# Supplementary material for: Nucleotide Analogues Bearing a C2′ or C3′-Stereogenic All-Carbon Quaternary Center as SARS-CoV-2 RdRp Inhibitors
Source: MDPI journal article supplement (doi:10.3390/molecules27020564), 2022-01-17

## Supporting Information

# Nucleotide Analogues bearing a C2' or C3'- Stereogenic All-Carbon Quaternary Center as SARS- CoV-2 RdRp Inhibitors

Amarender Manchoju<sup>1</sup>, Renaud Zelli<sup>1</sup>, Gang Wang<sup>1</sup>, Carla Eymard<sup>1</sup>, Adrian Oo<sup>2</sup>, Mona Nemer<sup>3\*</sup>, Michel Prévost<sup>1\*</sup>, Baek Kim<sup>2,4\*</sup>, and Yvan Guindon<sup>1,3,5\*</sup>

<sup>1</sup>Bio-Organic Chemistry Laboratory, Institut de Recherches Cliniques de Montréal, Montréal, Québec H2W 1R7, Canada.

<sup>2</sup>Department of Pediatrics, School of Medicine, Emory University, Atlanta, Georgia, USA.

<sup>3</sup>Department of Biochemistry, Microbiology and Immunology, University of Ottawa, Ottawa, ON, K1N 6N5, Canada.

<sup>4</sup>Children's Healthcare of Atlanta, Atlanta, Georgia, USA.

<sup>5</sup>Department of Chemistry, Université de Montréal, Montréal, QC H3C 3J7

\*Correspondence authors: mnemer@uottawa.ca (Mona Nemer), michel.prevast@ircm.qc.ca (Michel Prévost), baek.kim@emory.edu (Baek Kim), yvan.guindon@ircm.qc.ca (Yvan Guindon).

### Stereochemical Proofs:

The relative  $\beta$  configurations of protected and deprotected nucleoside analogues **26-28** and **29** were determined by relevant nuclear Overhauser effect (nOe) enhancements (2D NOESY).

In addition, NOESY experiments further confirmed the 1',2'-*trans* stereochemistry.

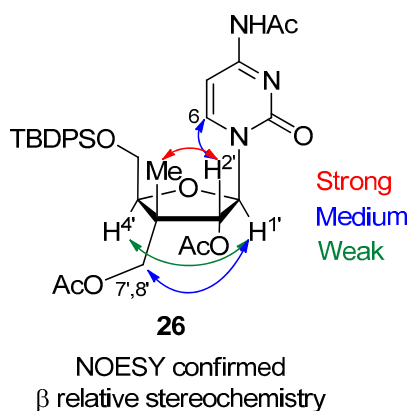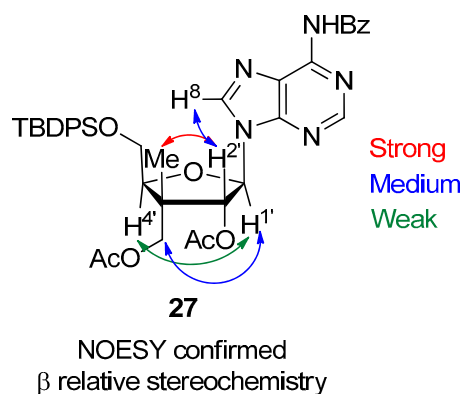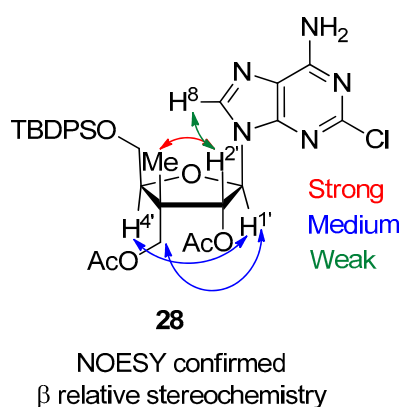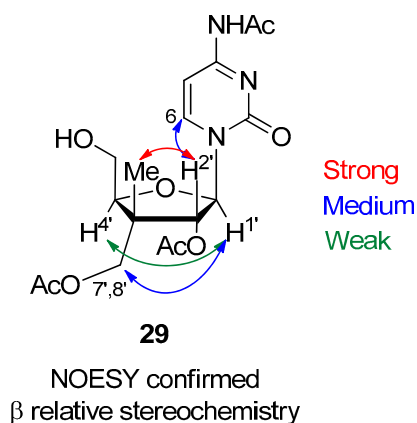

The N<sup>9</sup> regiochemistry of the purine ring of compounds **30-31** and **33-34** was determined from HSQC and HMBC experiments. In addition, NOESY experiments further confirmed the 1',2'-*trans* stereochemistry.

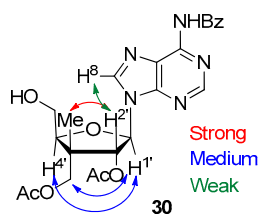

NOESY confirmed  
β relative stereochemistry

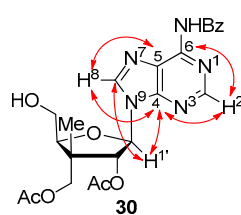

From HSQC

H<sup>8</sup> (8.82 ppm) ↔ C<sup>8</sup> (144.5 ppm)  
H<sup>2'</sup> (4.5 ppm) ↔ C<sup>2'</sup> (153.1 ppm)  
H<sup>1'</sup> (6.35 ppm) ↔ C<sup>1'</sup> (88.4 ppm)

From HMBC

H<sup>8</sup> (8.82 ppm) ↔ C<sup>5</sup> (125.2 ppm)  
H<sup>8</sup> (8.82 ppm) ↔ C<sup>4</sup> (153.4 ppm)  
H<sup>2'</sup> (4.5 ppm) ↔ C<sup>6</sup> (151.2 ppm)  
H<sup>2'</sup> (4.5 ppm) ↔ C<sup>4</sup> (153.4 ppm)  
**H<sup>1'</sup> (6.35 ppm) ↔ C<sup>4</sup> (153.4 ppm)**  
H<sup>1'</sup> (6.35 ppm) ↔ C<sup>8</sup> (144.5 ppm)

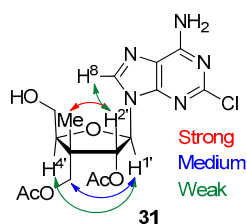

NOESY confirmed  
β relative stereochemistry

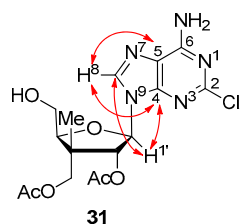

From HSQC

H<sup>8</sup> (8.41 ppm) ↔ C<sup>8</sup> (141.6 ppm)  
H<sup>1'</sup> (6.12 ppm) ↔ C<sup>1'</sup> (151.7 ppm)

From HMBC

H<sup>8</sup> (8.41 ppm) ↔ C<sup>5</sup> (119.4 ppm)  
H<sup>8</sup> (8.41 ppm) ↔ C<sup>4</sup> (151.7 ppm)  
H<sup>1'</sup> (6.12 ppm) ↔ C<sup>8</sup> (141.6 ppm)  
**H<sup>1'</sup> (6.12 ppm) ↔ C<sup>4</sup> (151.7 ppm)**

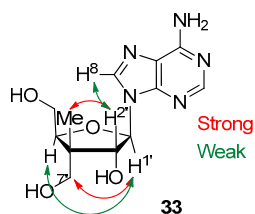

NOESY confirmed  
β relative stereochemistry

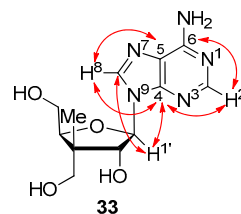

From HSQC

H<sup>8</sup> (8.30 ppm) ↔ C<sup>8</sup> (142.4 ppm)  
H<sup>2'</sup> (4.5 ppm) ↔ C<sup>2'</sup> (153.3 ppm)  
H<sup>1'</sup> (6.03 ppm) ↔ C<sup>1'</sup> (91.4 ppm)

From HMBC

H<sup>8</sup> (8.30 ppm) ↔ C<sup>5</sup> (121.1 ppm)  
H<sup>8</sup> (8.30 ppm) ↔ C<sup>4</sup> (149.9 ppm)  
H<sup>2'</sup> (4.5 ppm) ↔ C<sup>6</sup> (157.6 ppm)  
H<sup>2'</sup> (4.5 ppm) ↔ C<sup>4</sup> (149.9 ppm)  
**H<sup>1'</sup> (6.03 ppm) ↔ C<sup>4</sup> (149.9 ppm)**  
H<sup>1'</sup> (6.03 ppm) ↔ C<sup>8</sup> (142.4 ppm)

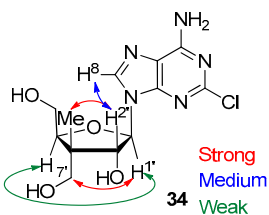

NOESY confirmed  
β relative stereochemistry

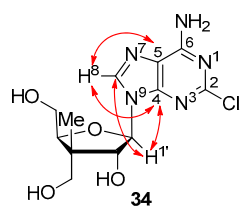

From HSQC

H<sup>8</sup> (8.30 ppm) ↔ C<sup>8</sup> (142.4 ppm)  
H<sup>1'</sup> (5.98 ppm) ↔ C<sup>1'</sup> (91.1 ppm)

From HMBC

H<sup>8</sup> (8.30 ppm) ↔ C<sup>5</sup> (119.9 ppm)  
H<sup>8</sup> (8.30 ppm) ↔ C<sup>4</sup> (151.4 ppm)  
H<sup>1'</sup> (5.98 ppm) ↔ C<sup>8</sup> (142.4 ppm)  
**H<sup>1'</sup> (5.98 ppm) ↔ C<sup>4</sup> (151.4 ppm)**

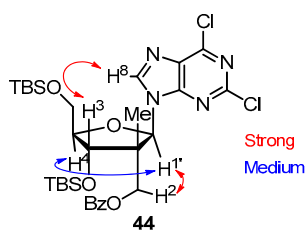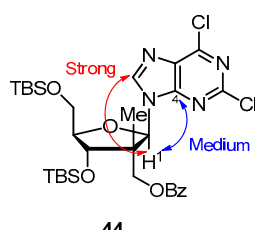

From HSQC

H<sup>1</sup> (6.61 ppm) ↔ C<sup>1</sup> (88.16 ppm)  
H<sup>8</sup> (6.90 ppm) ↔ C<sup>8</sup> (145.00 ppm)

From HMBC

**H<sup>1</sup> (6.60 ppm) ↔ C<sup>4</sup> (152.83 ppm)**  
H<sup>1</sup> (6.60 ppm) ↔ C<sup>8</sup> (145.00 ppm)

<sup>1</sup>H-NMR (500 MHz, CDCl<sub>3</sub>)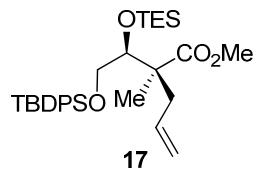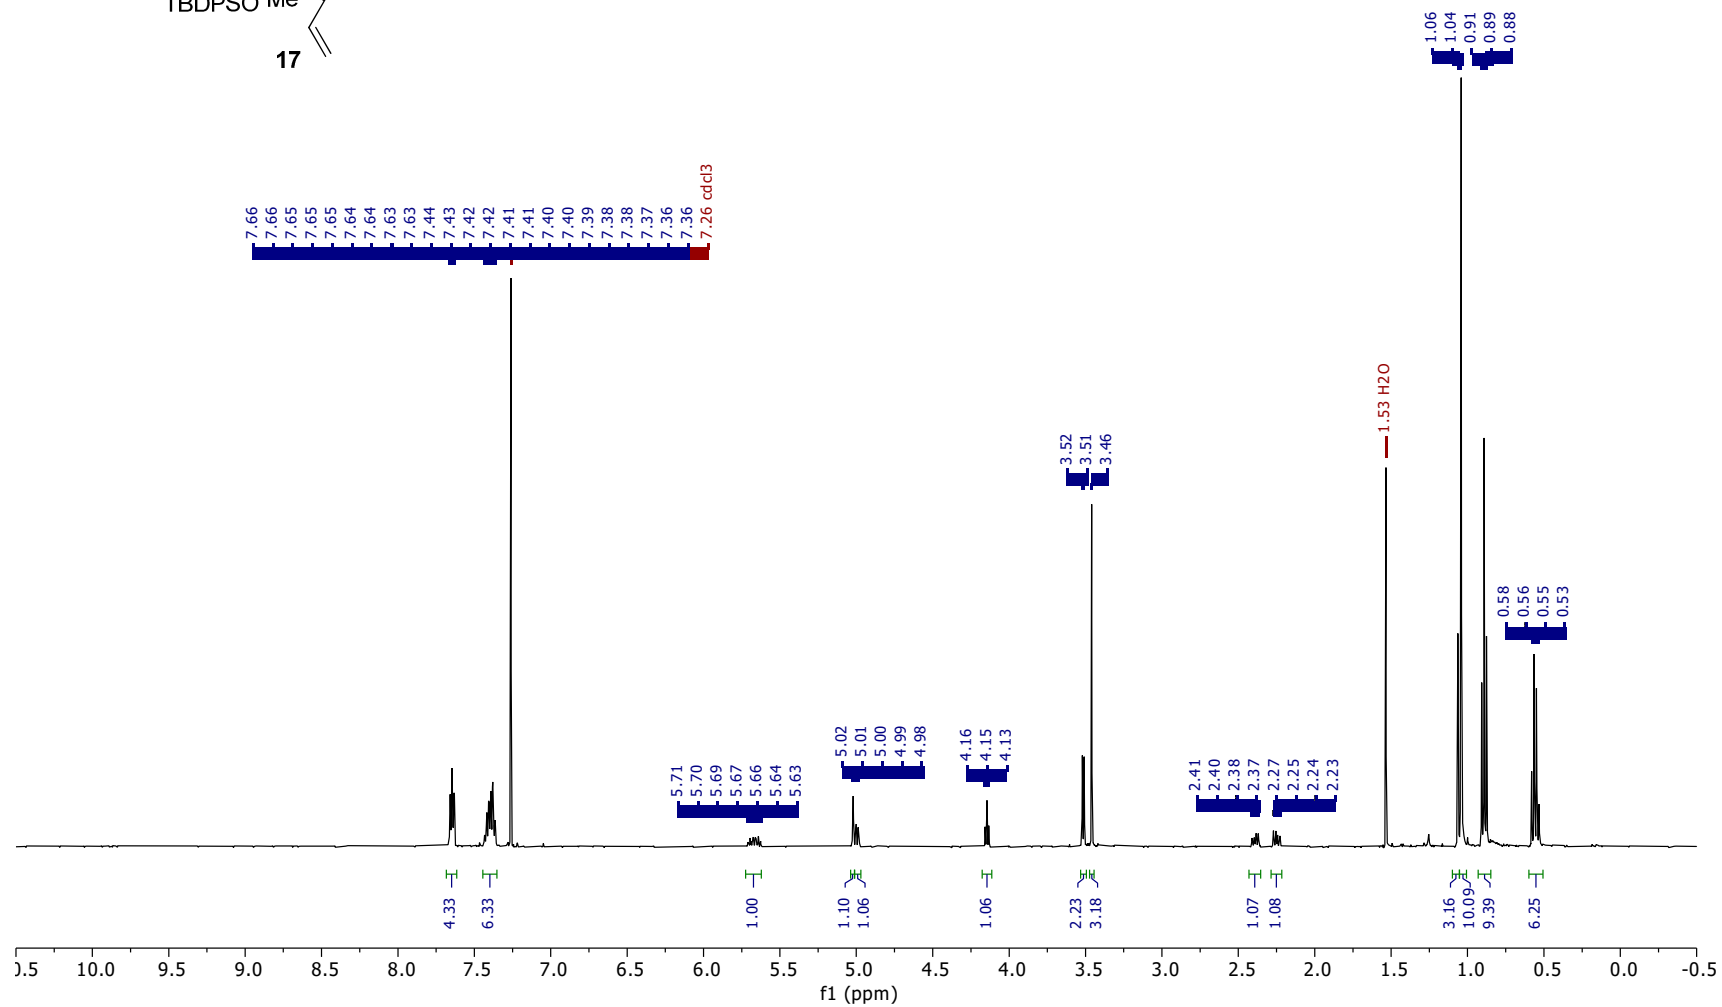

$^{13}\text{C}\{^1\text{H}\}$ -NMR (126 MHz,  $\text{CDCl}_3$ )

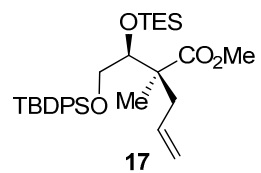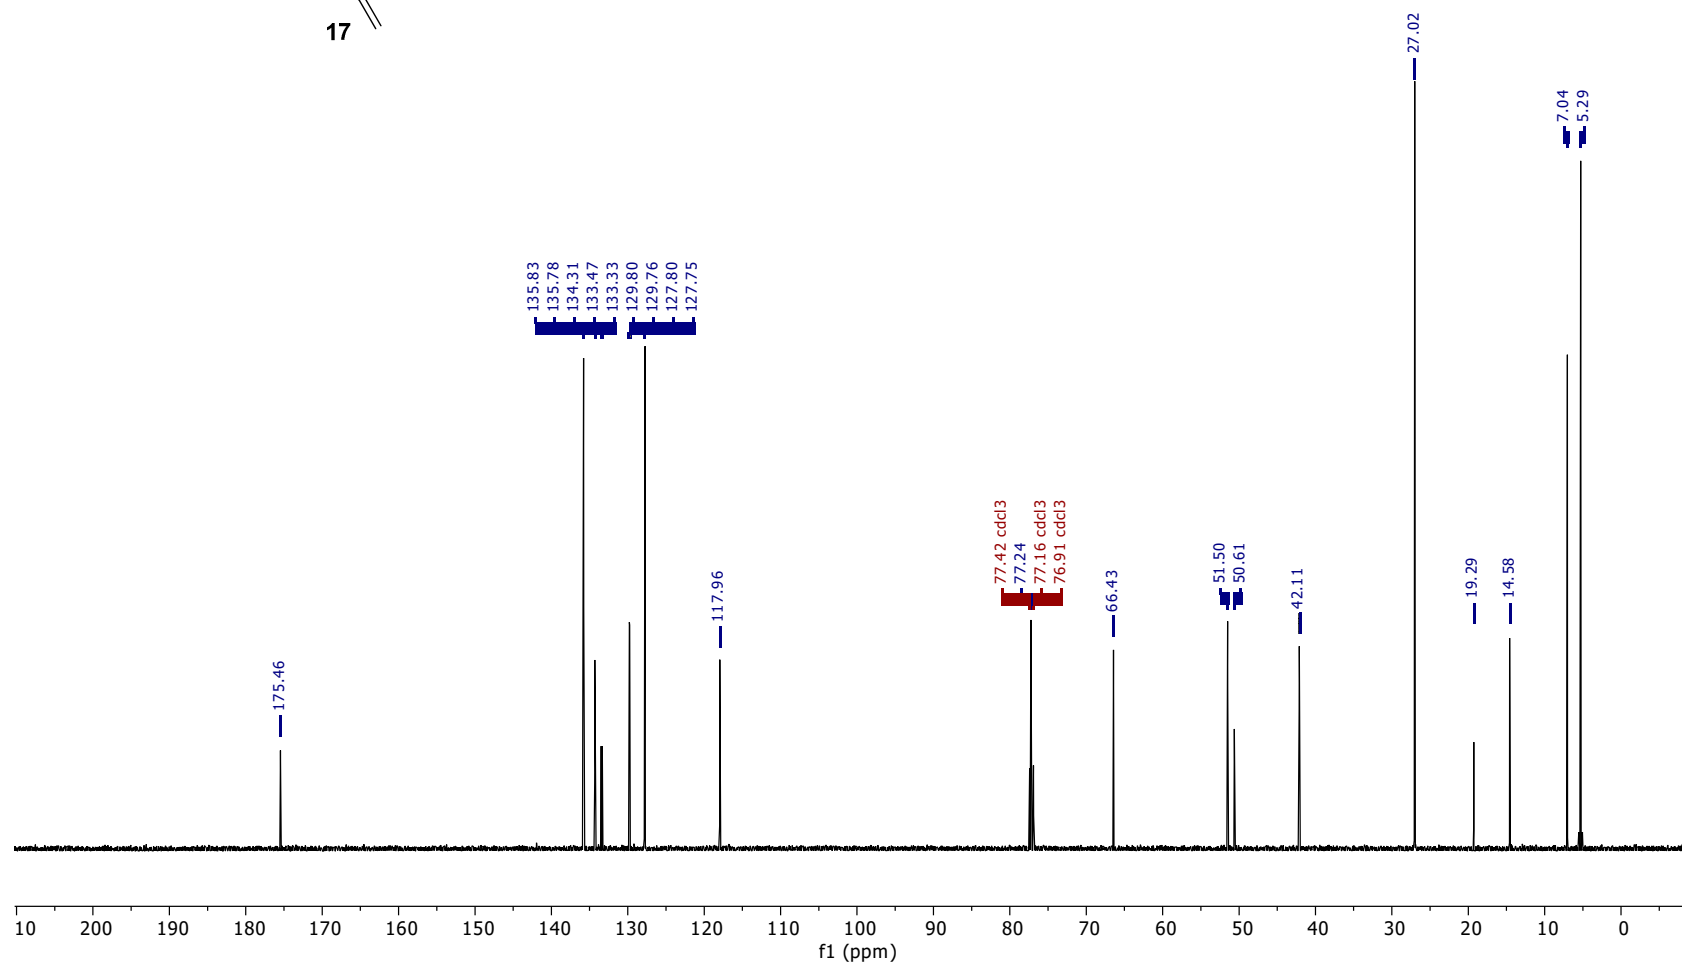

<sup>1</sup>H-NMR (500 MHz, CDCl<sub>3</sub>)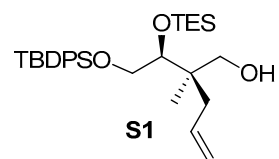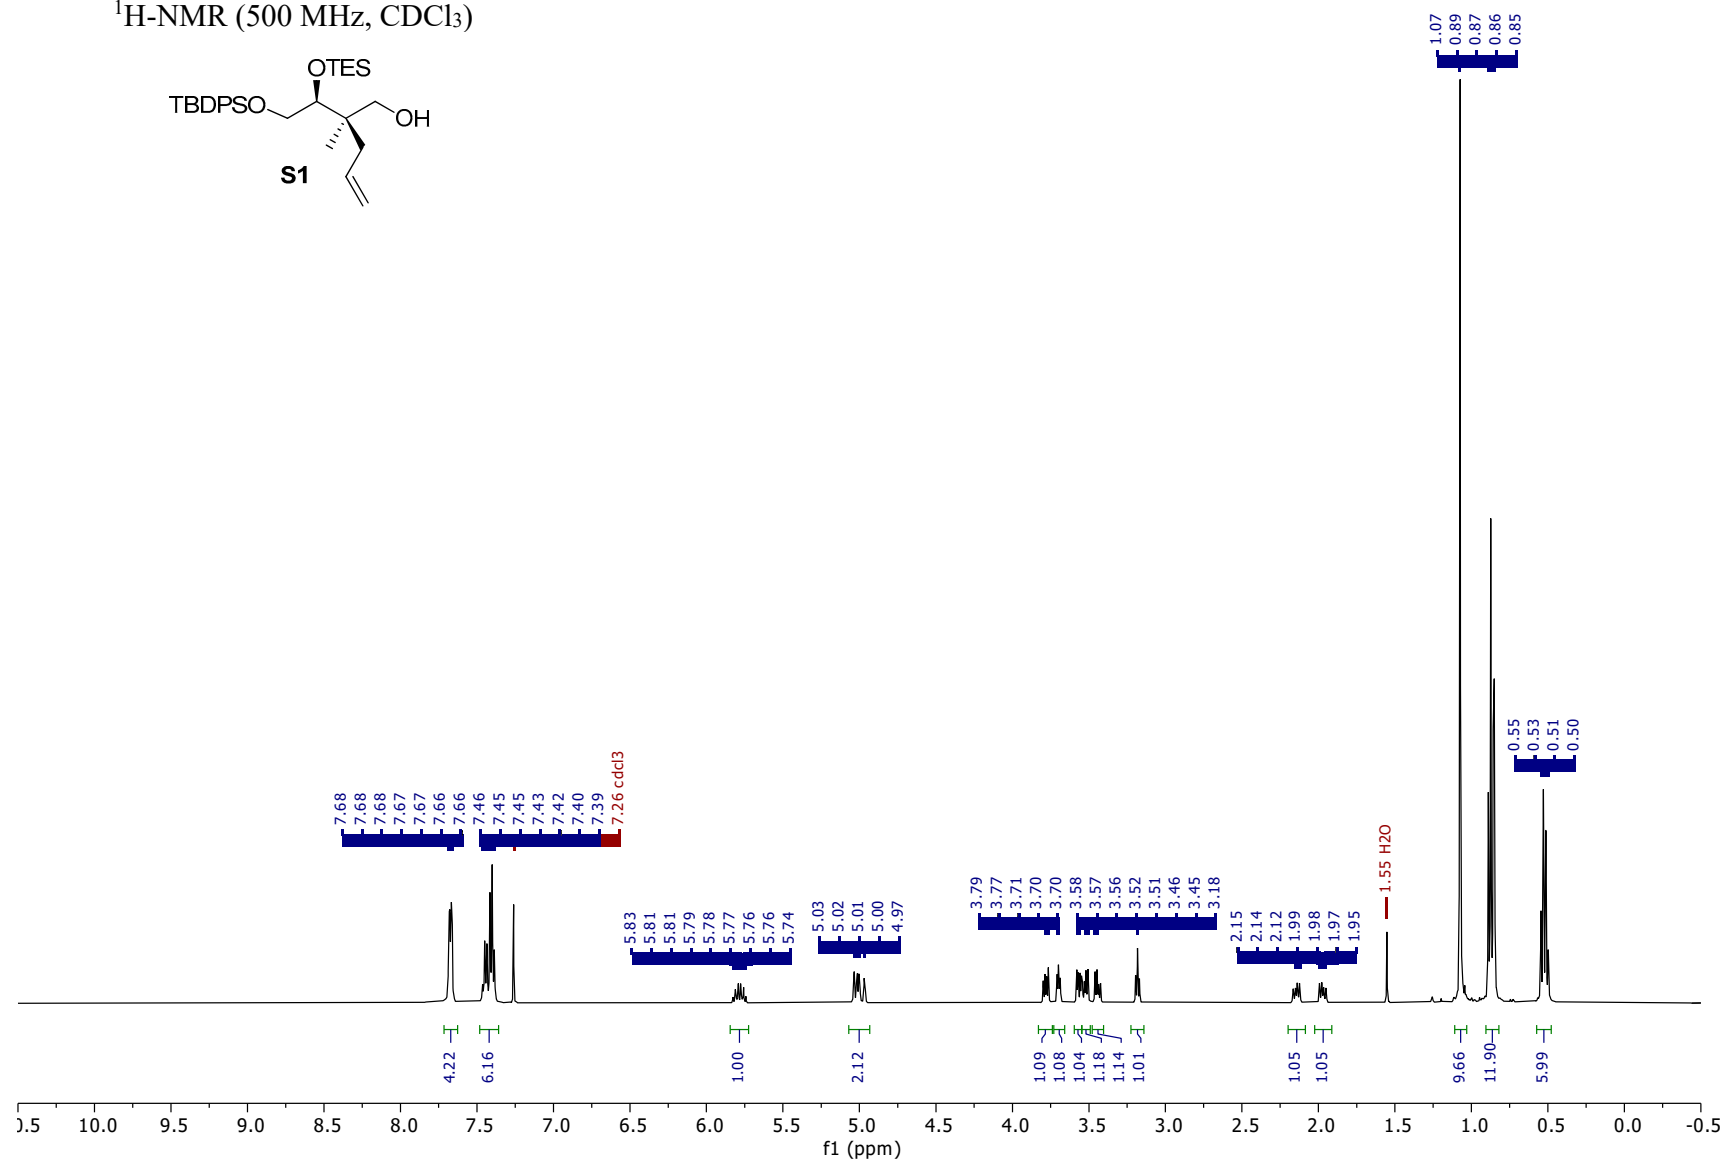

$^{13}\text{C}\{^1\text{H}\}$ -NMR (126 MHz,  $\text{CDCl}_3$ )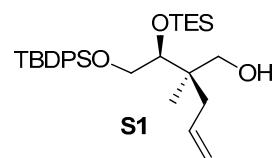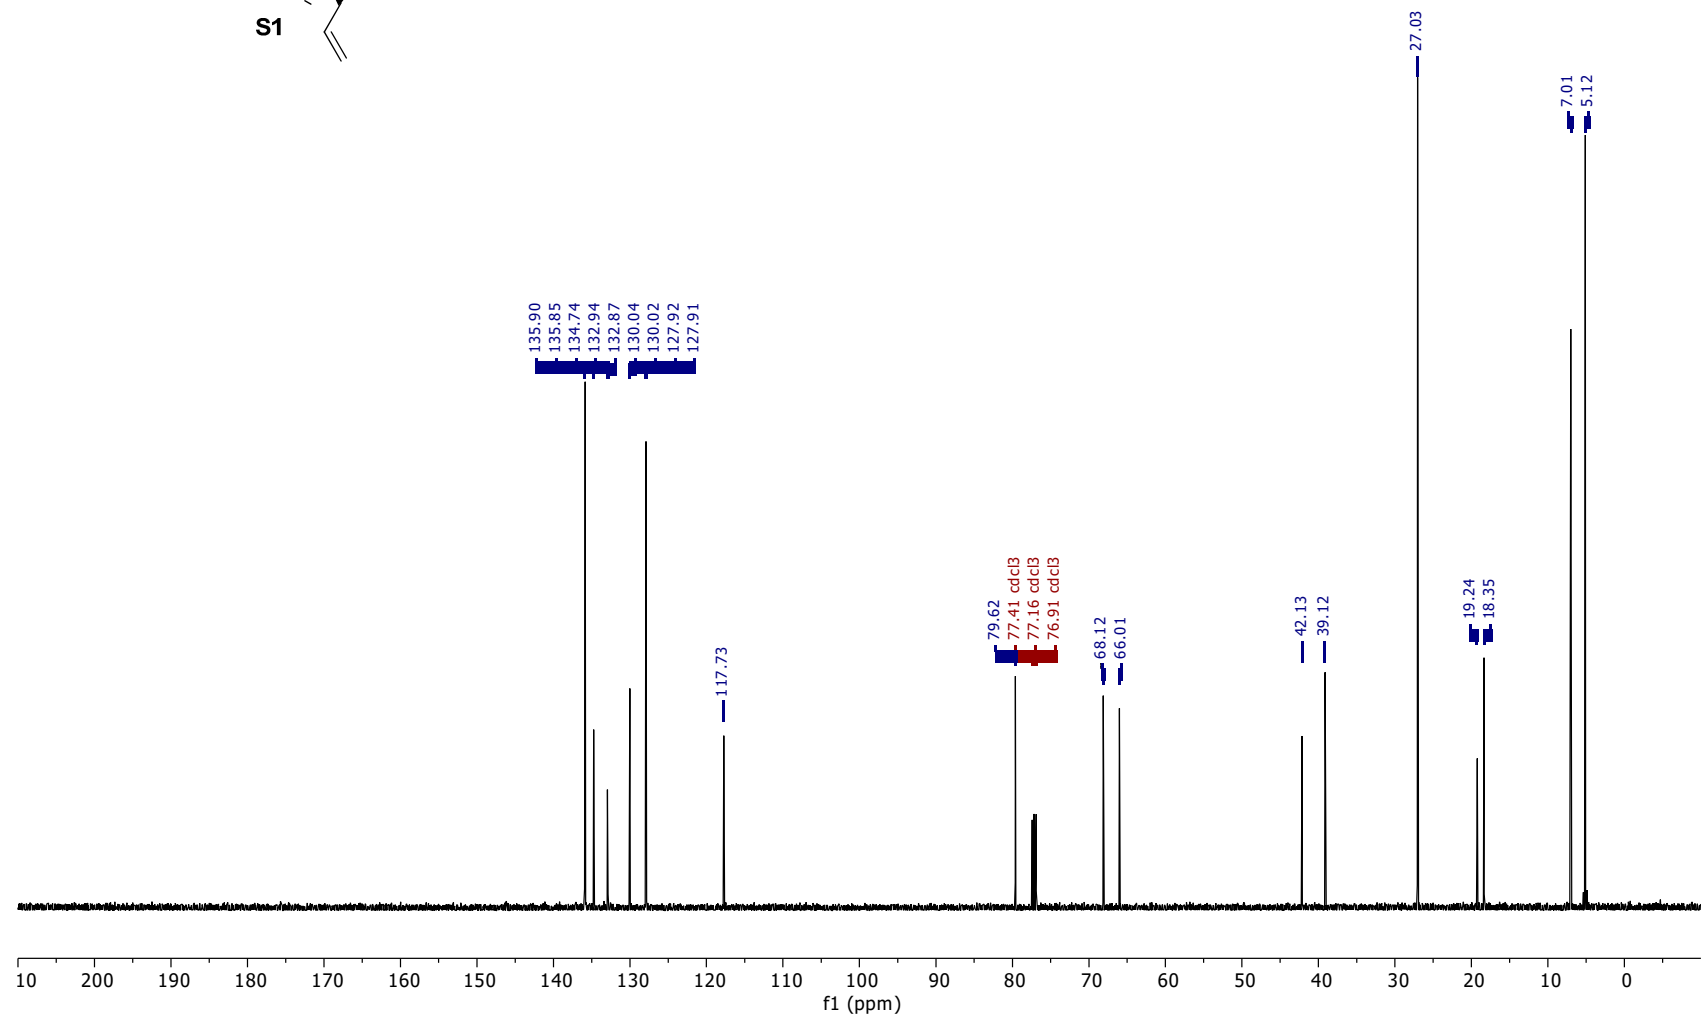

$^1\text{H}$ -NMR (500 MHz,  $\text{CDCl}_3$ )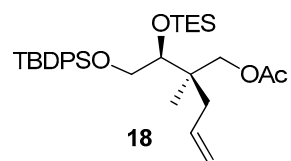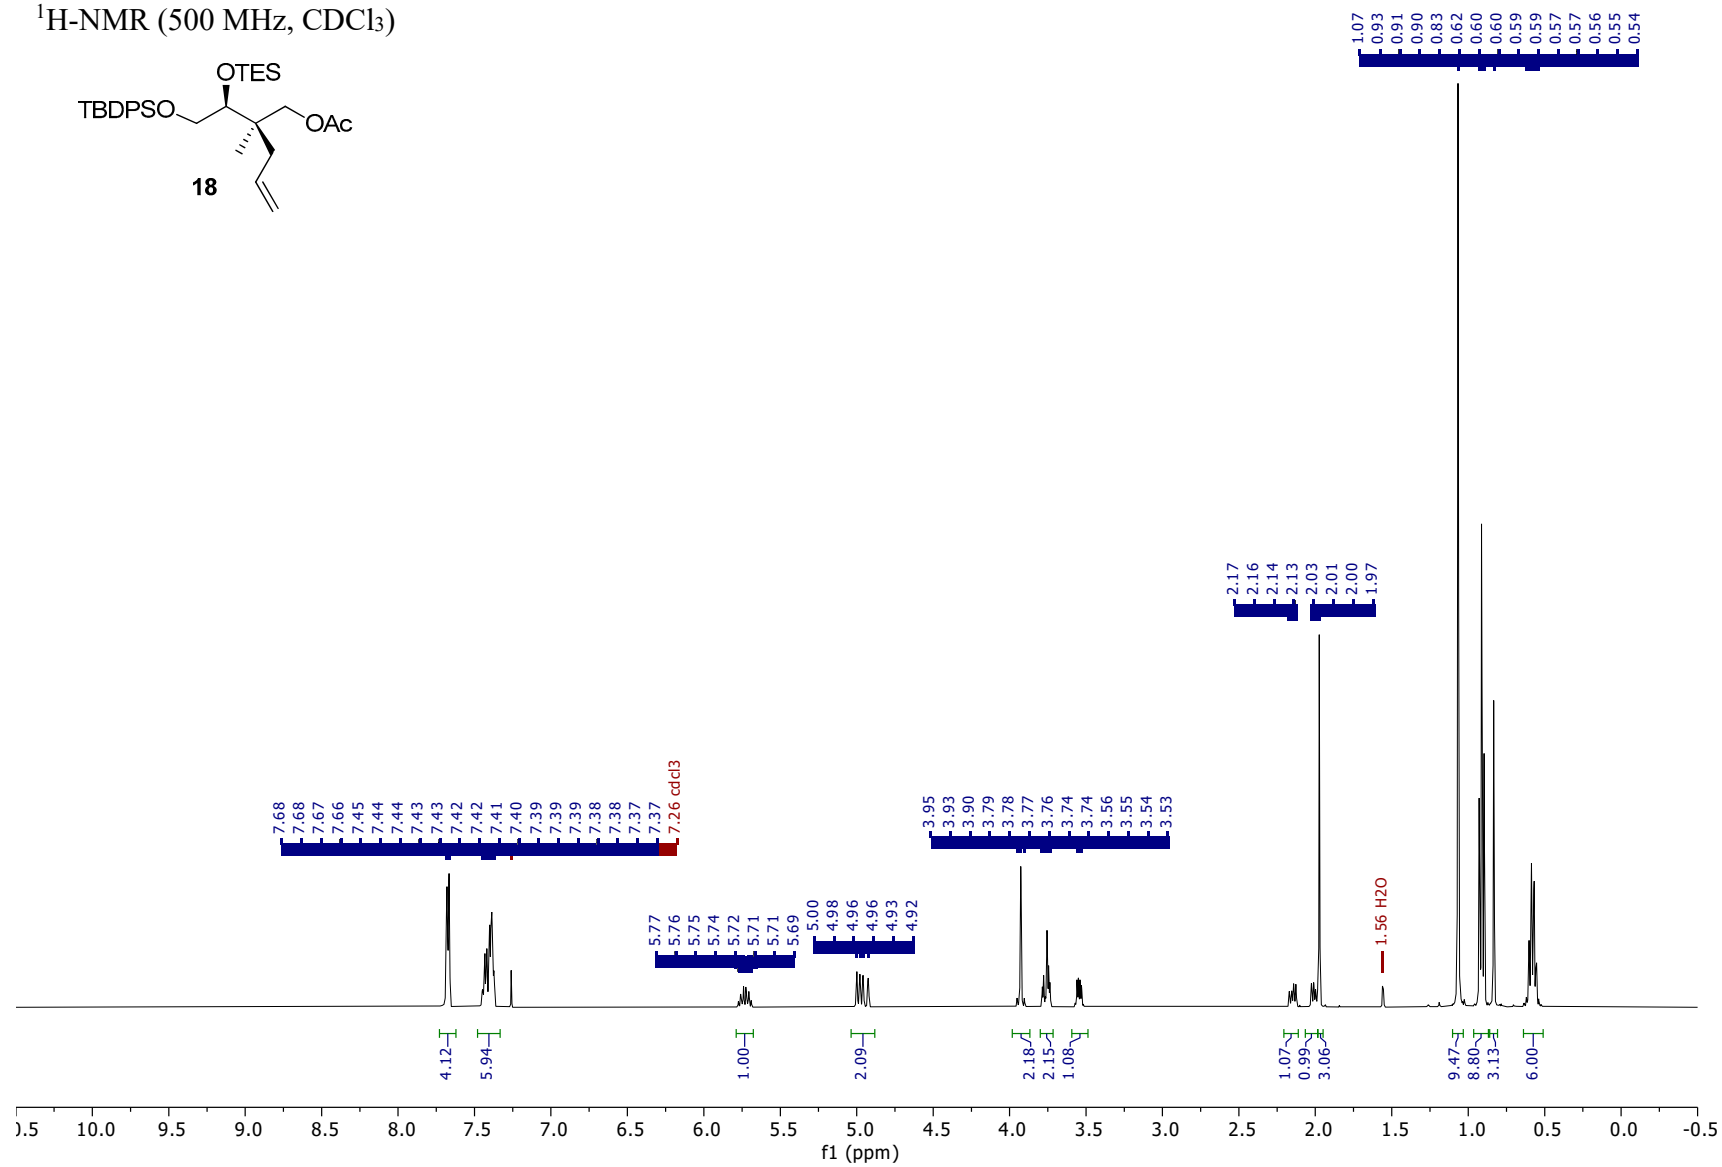



$^{13}\text{C}\{^1\text{H}\}$ -NMR (126 MHz,  $\text{CDCl}_3$ )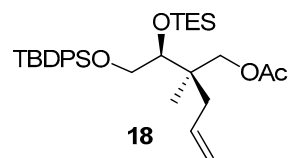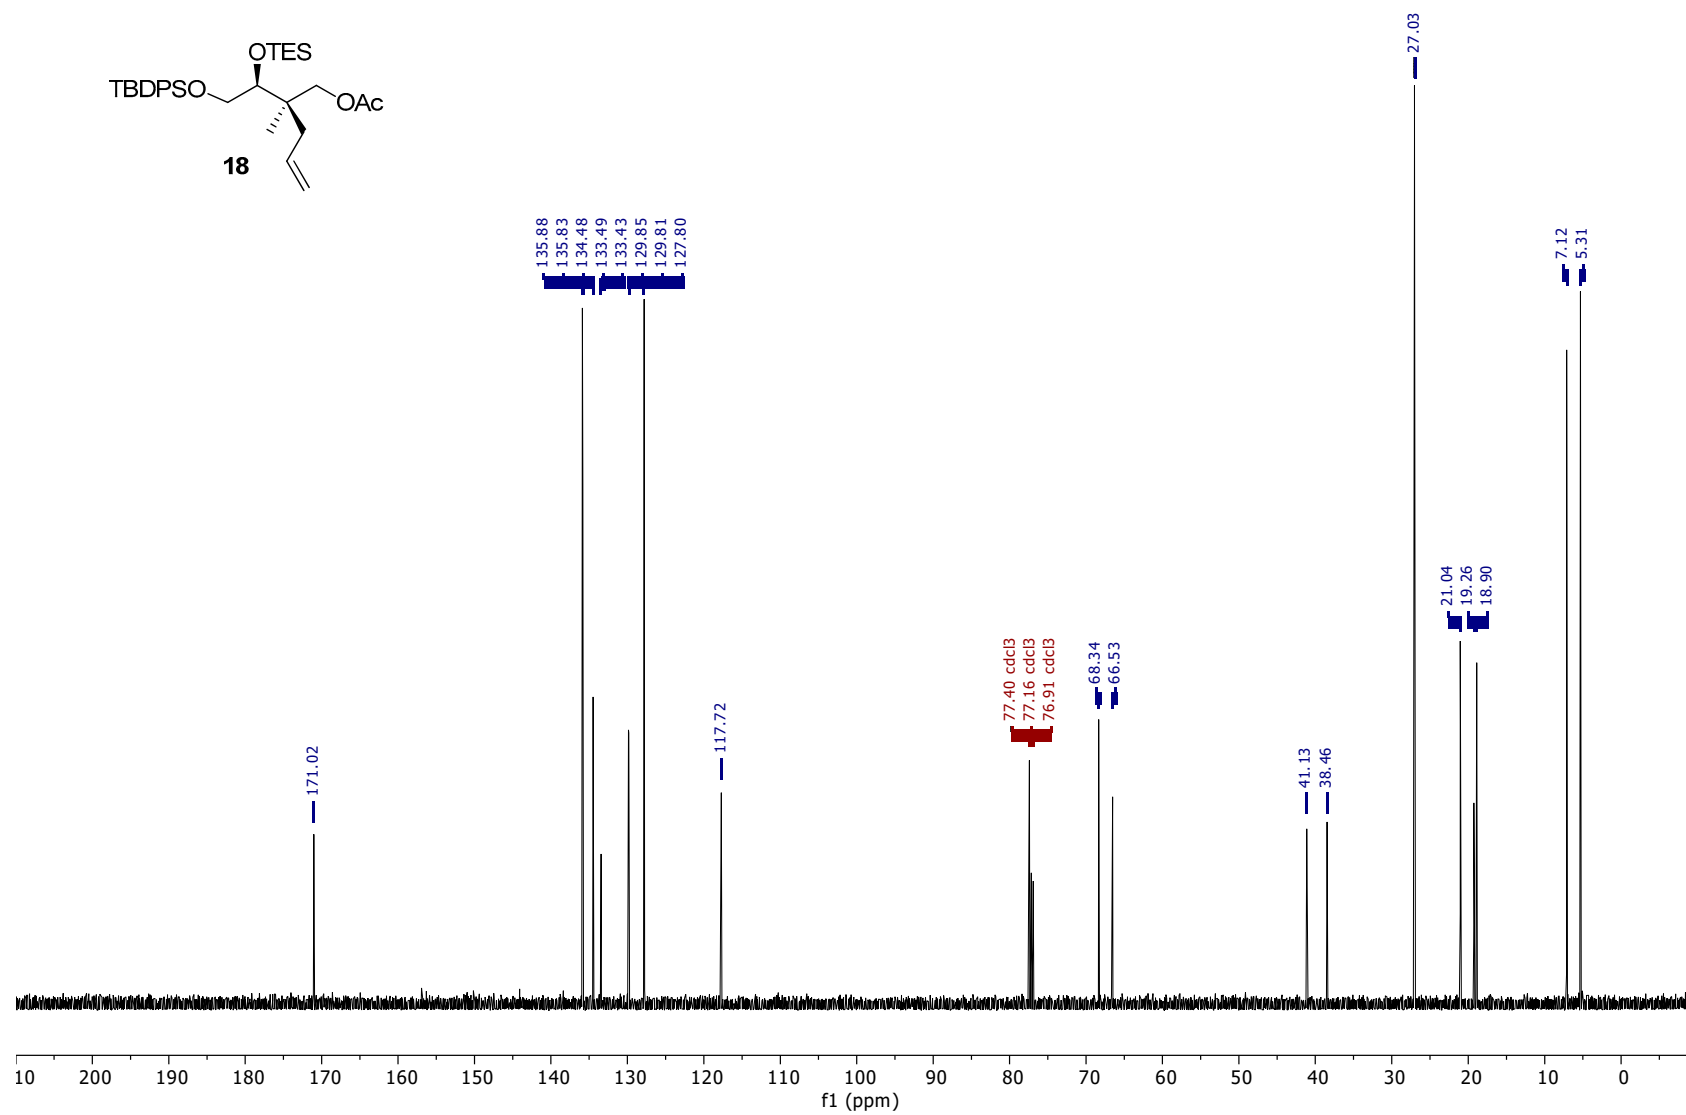

$^1\text{H}$ -NMR (500 MHz,  $\text{CDCl}_3$ )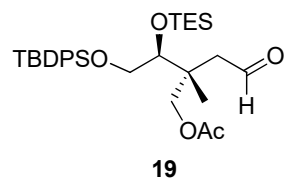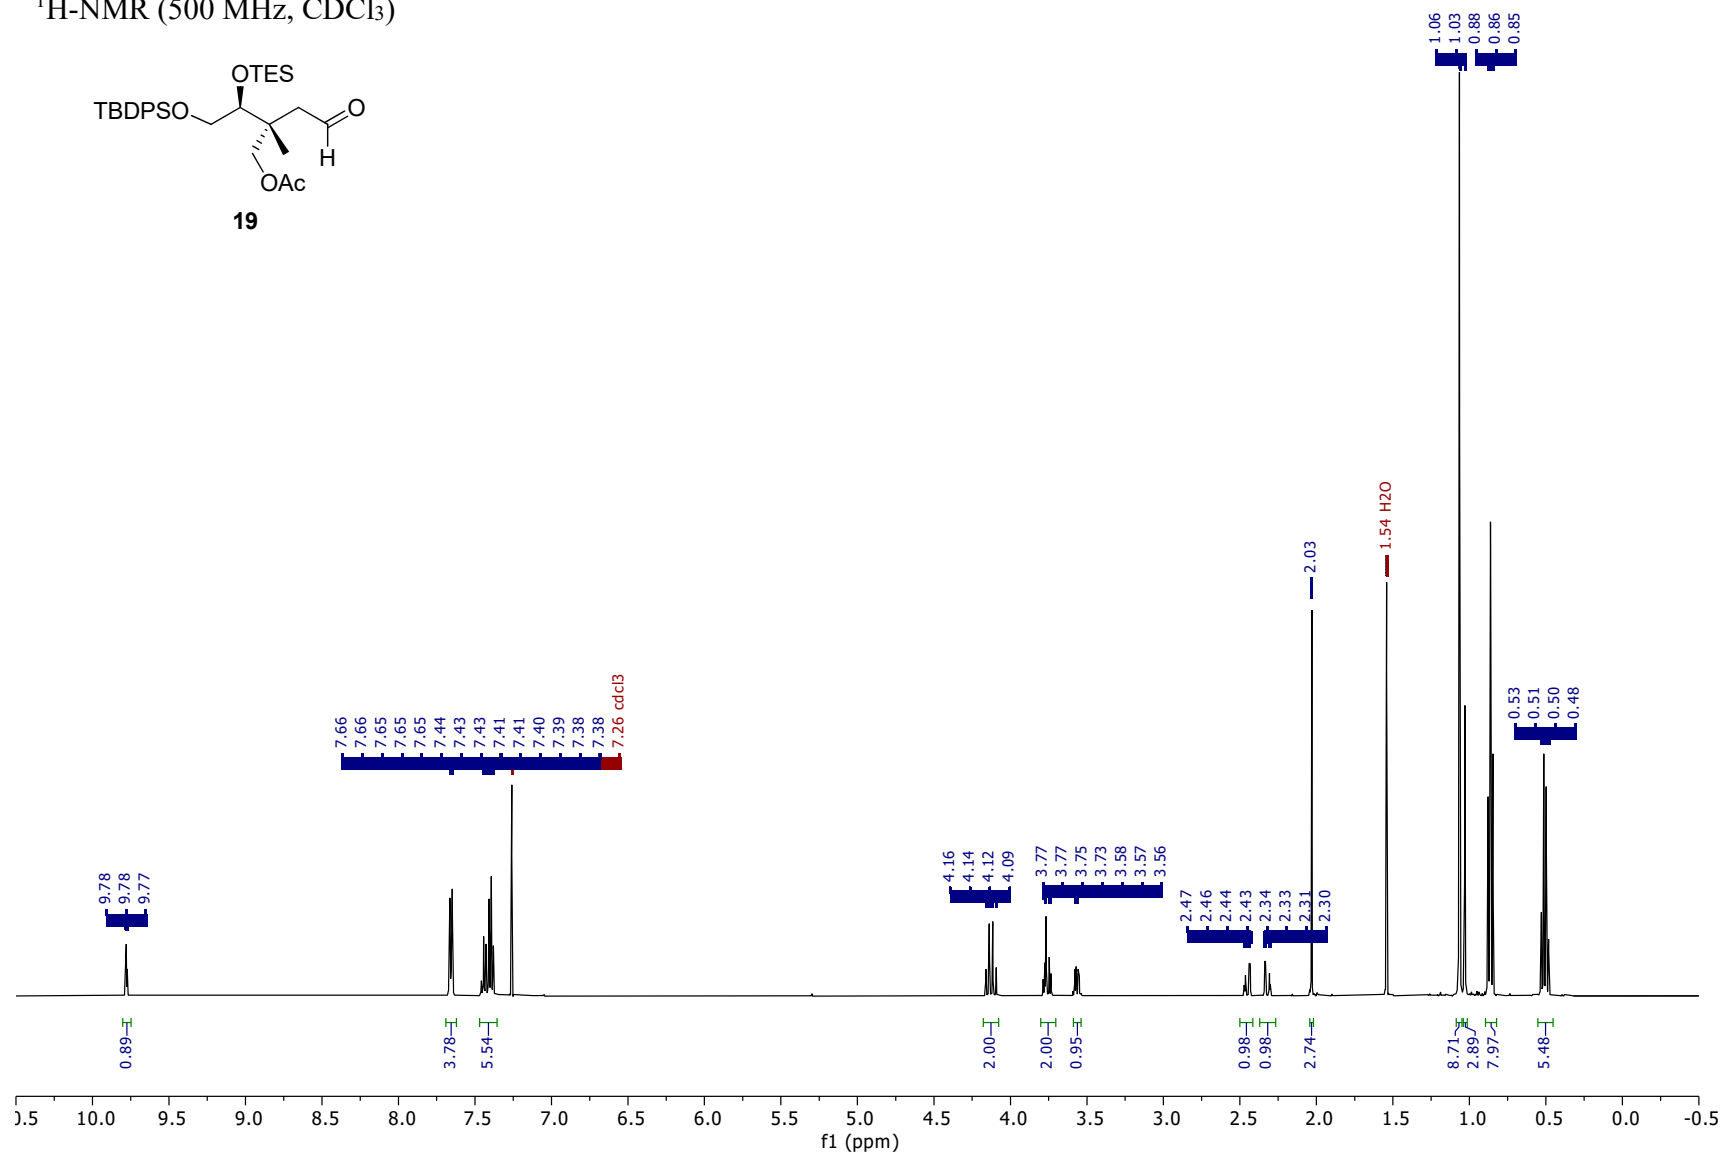

$^{13}\text{C}\{^1\text{H}\}$ -NMR (126 MHz,  $\text{CDCl}_3$ )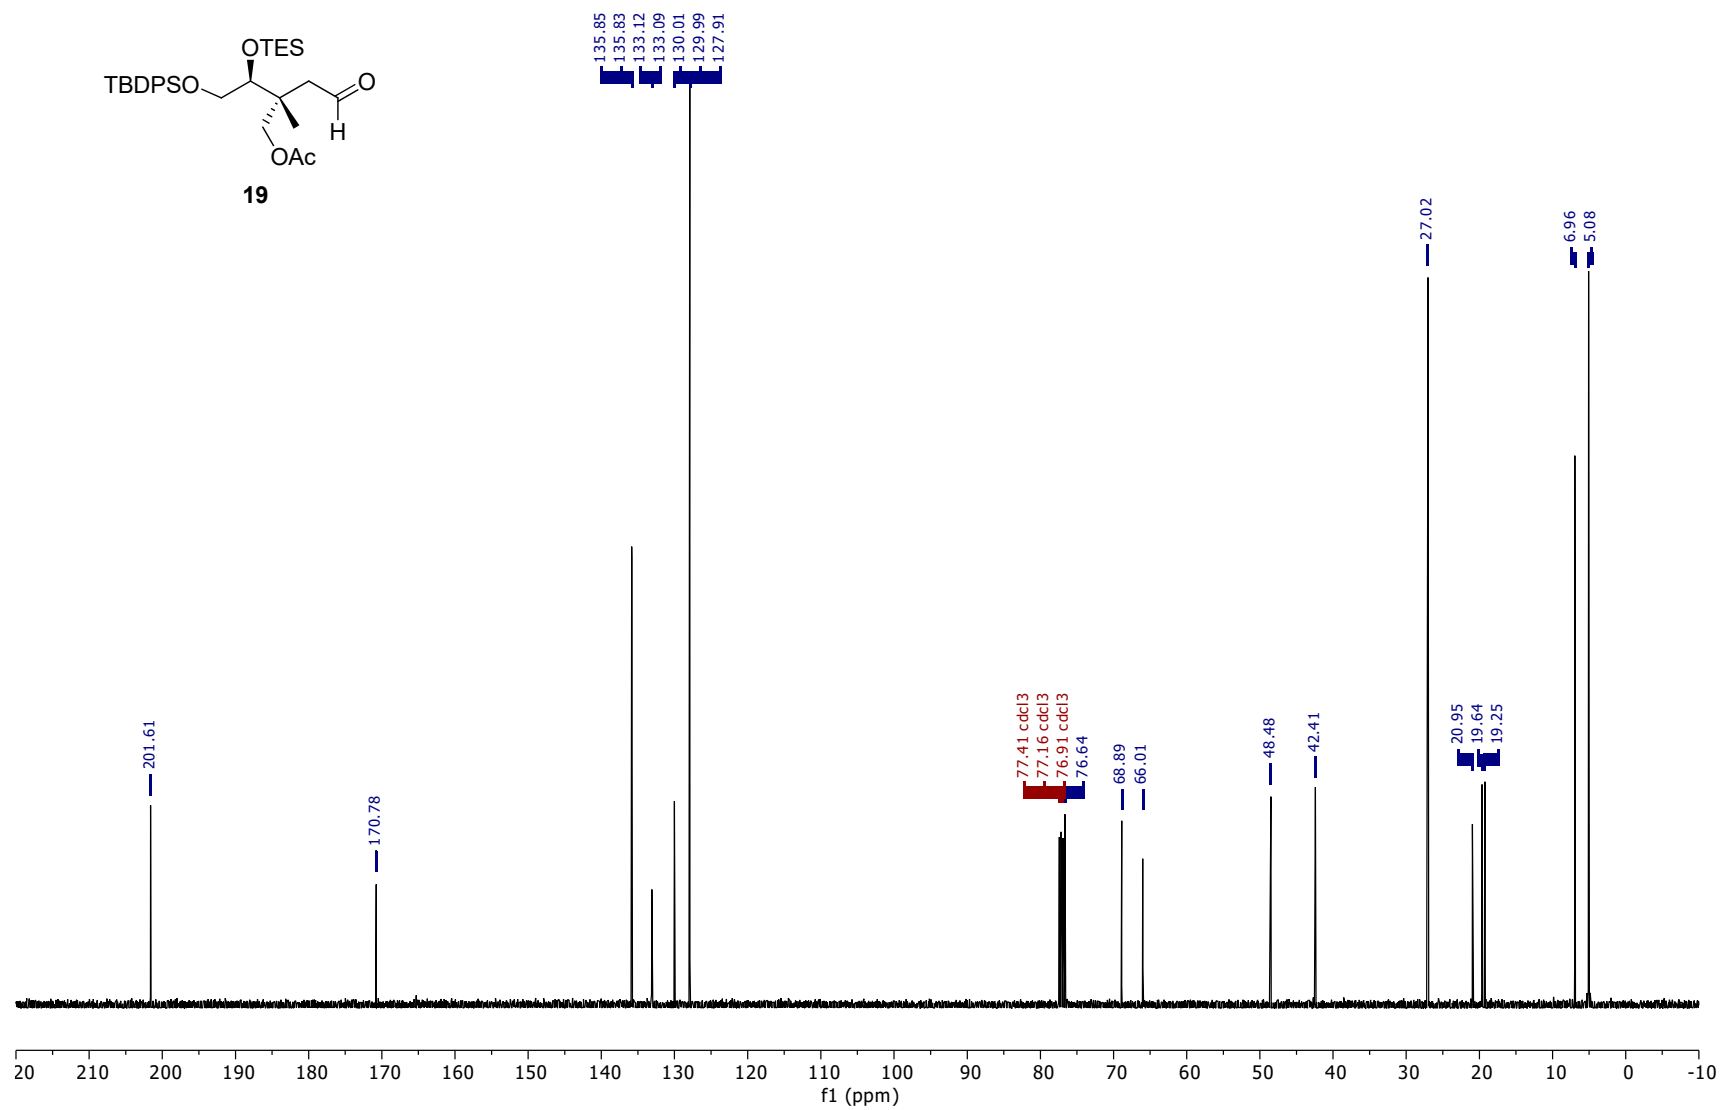

<sup>1</sup>H-NMR (500 MHz, CDCl<sub>3</sub>)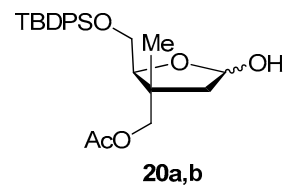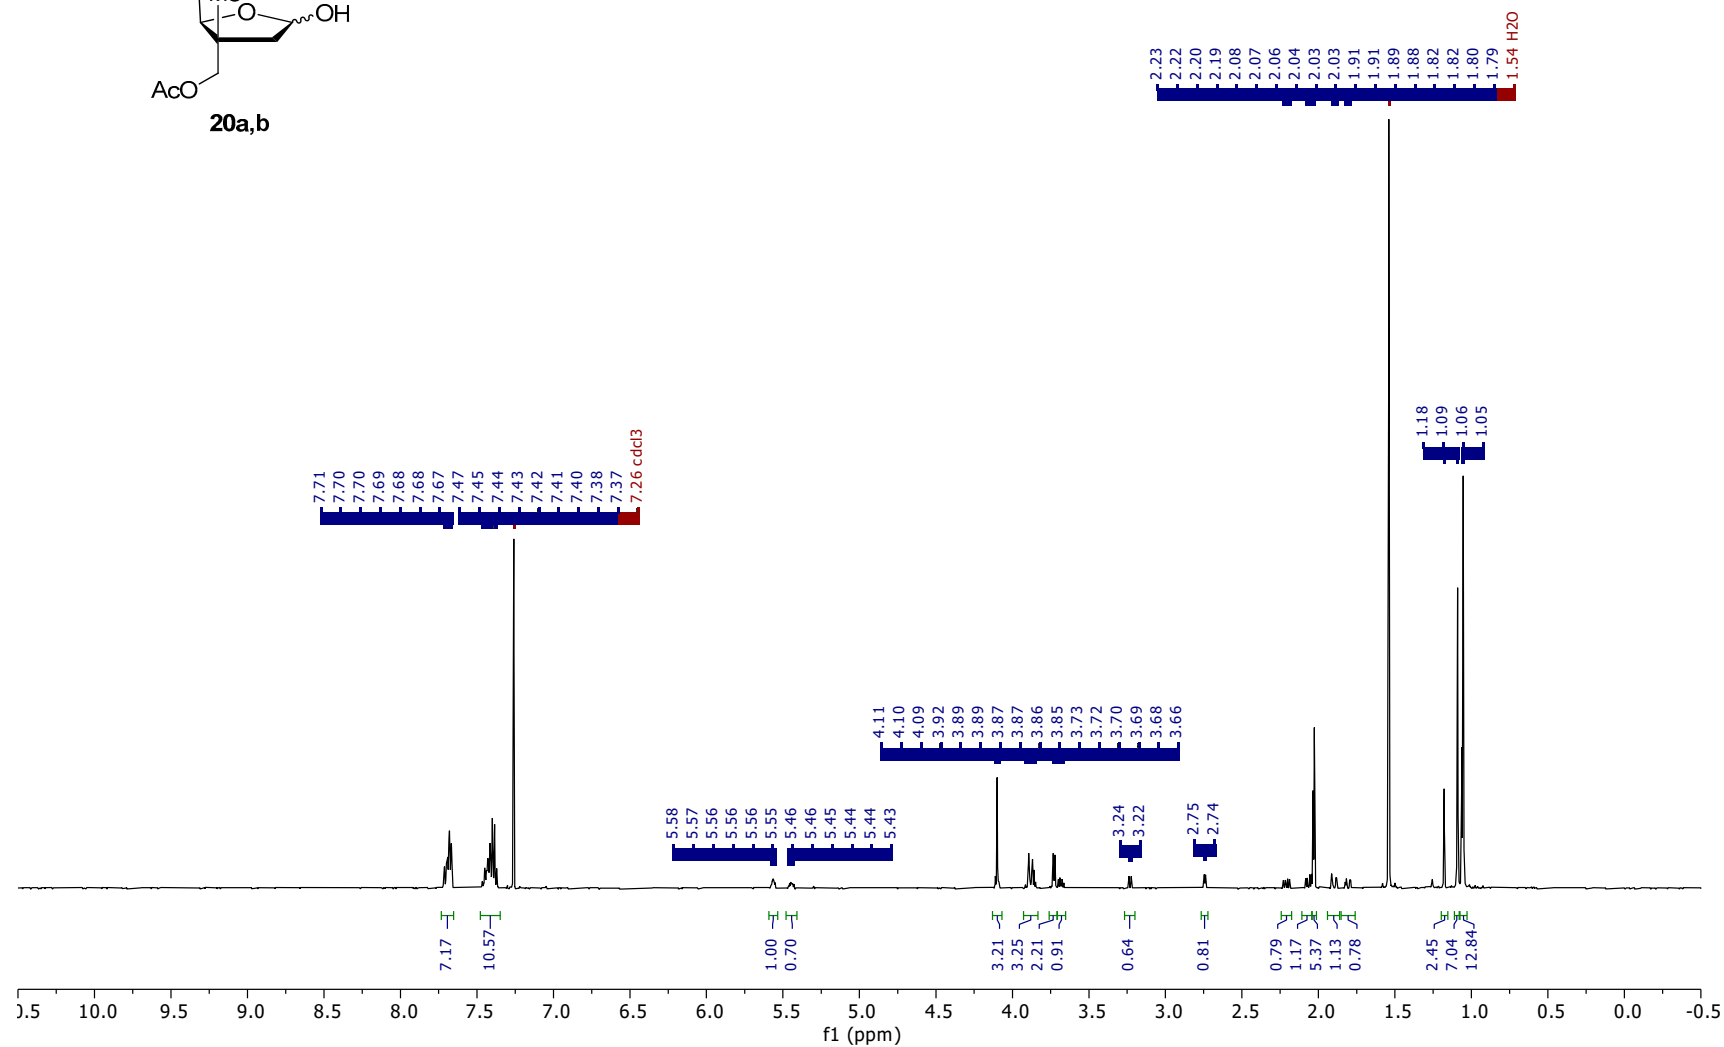

$^{13}\text{C}\{^1\text{H}\}$ -NMR (126 MHz,  $\text{CDCl}_3$ )

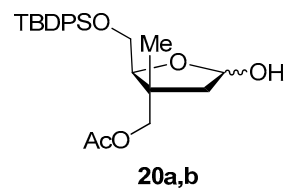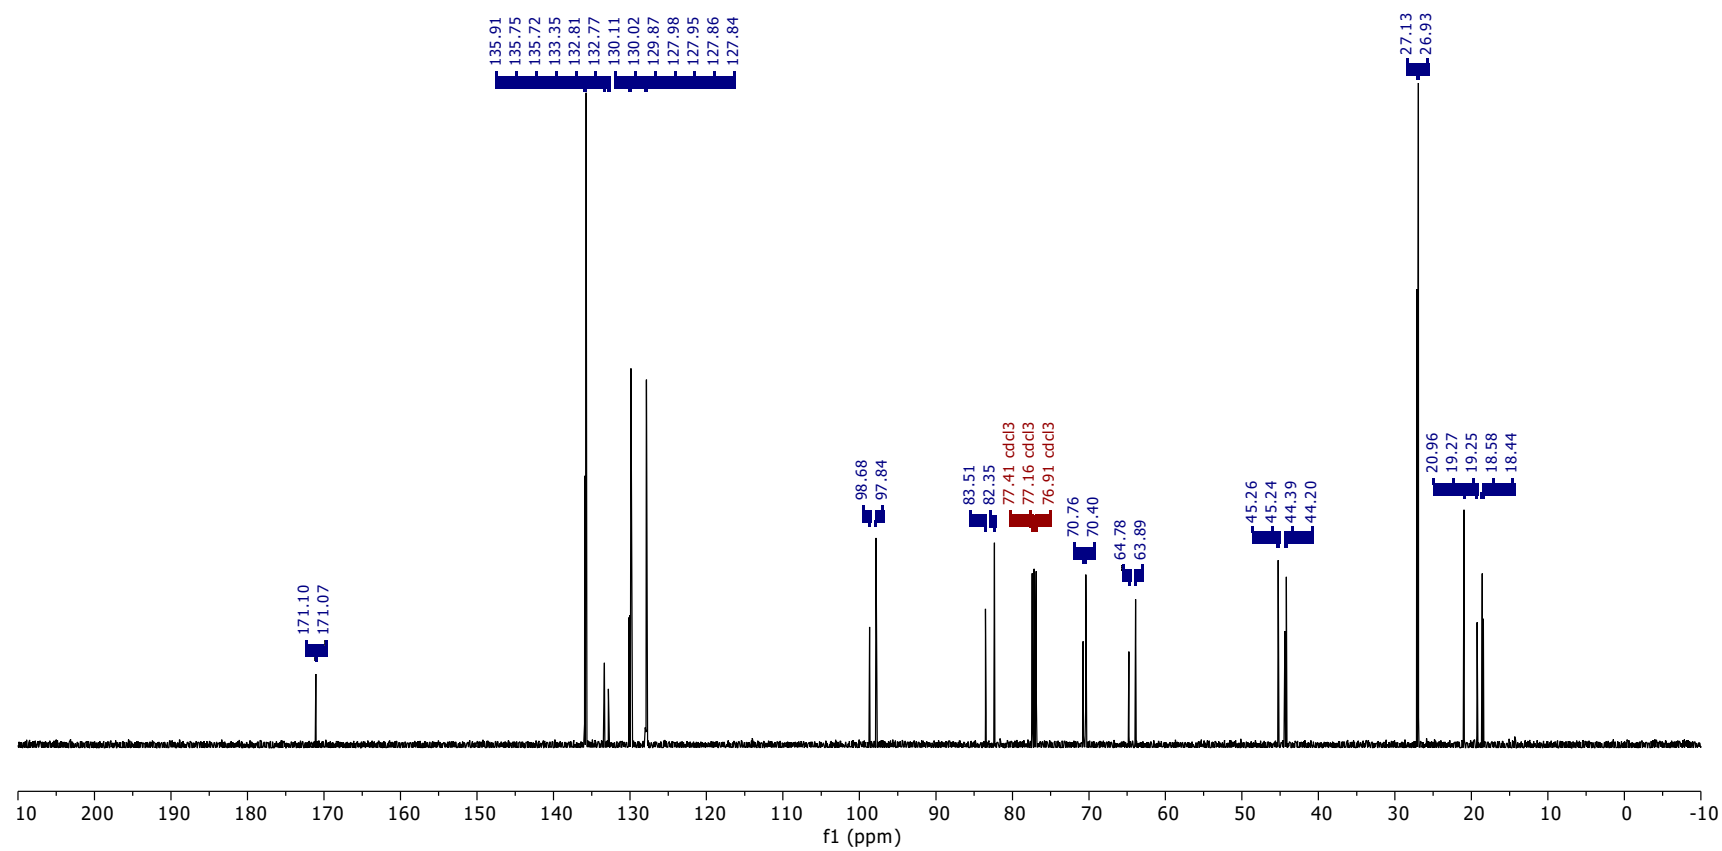

$^1\text{H}$ -NMR (500 MHz,  $\text{CDCl}_3$ )

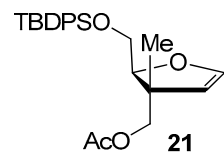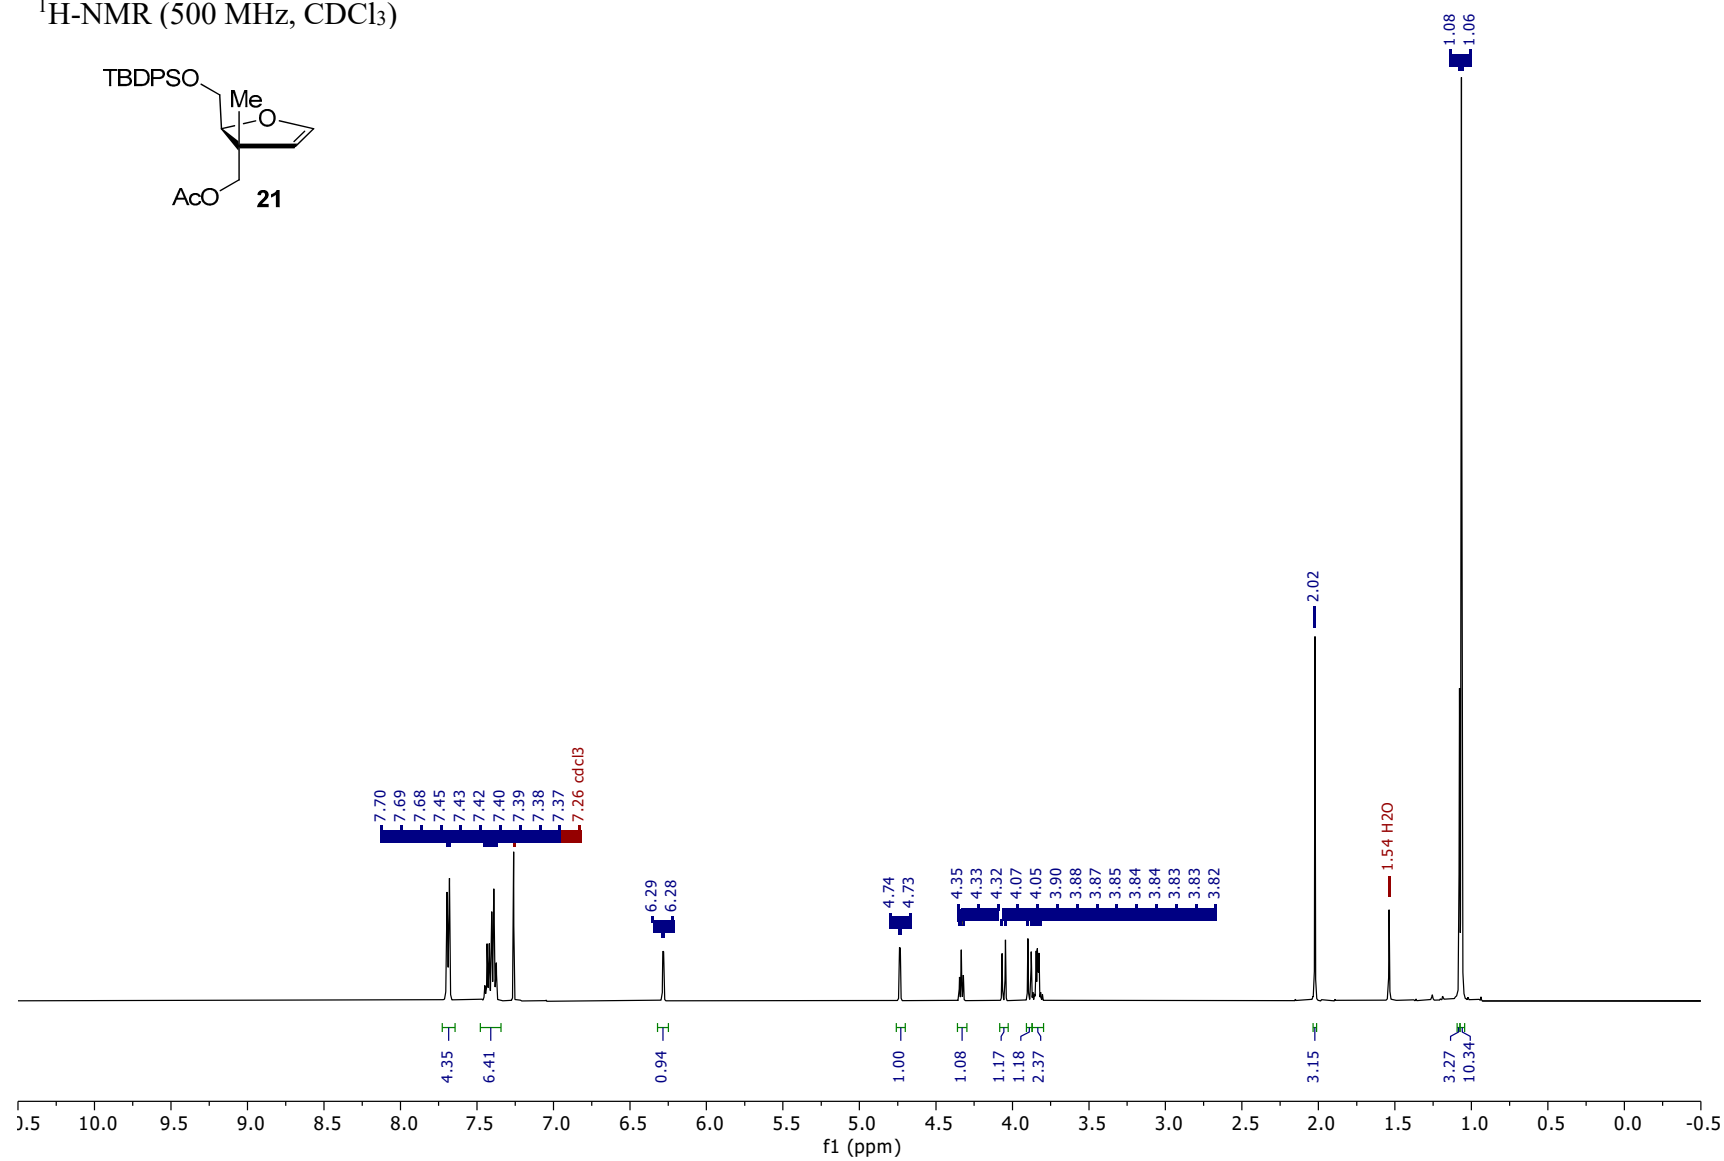

$^{13}\text{C}\{^1\text{H}\}$ -NMR (126 MHz,  $\text{CDCl}_3$ )

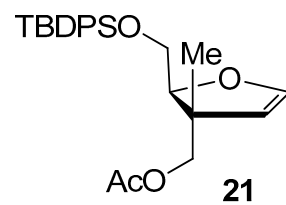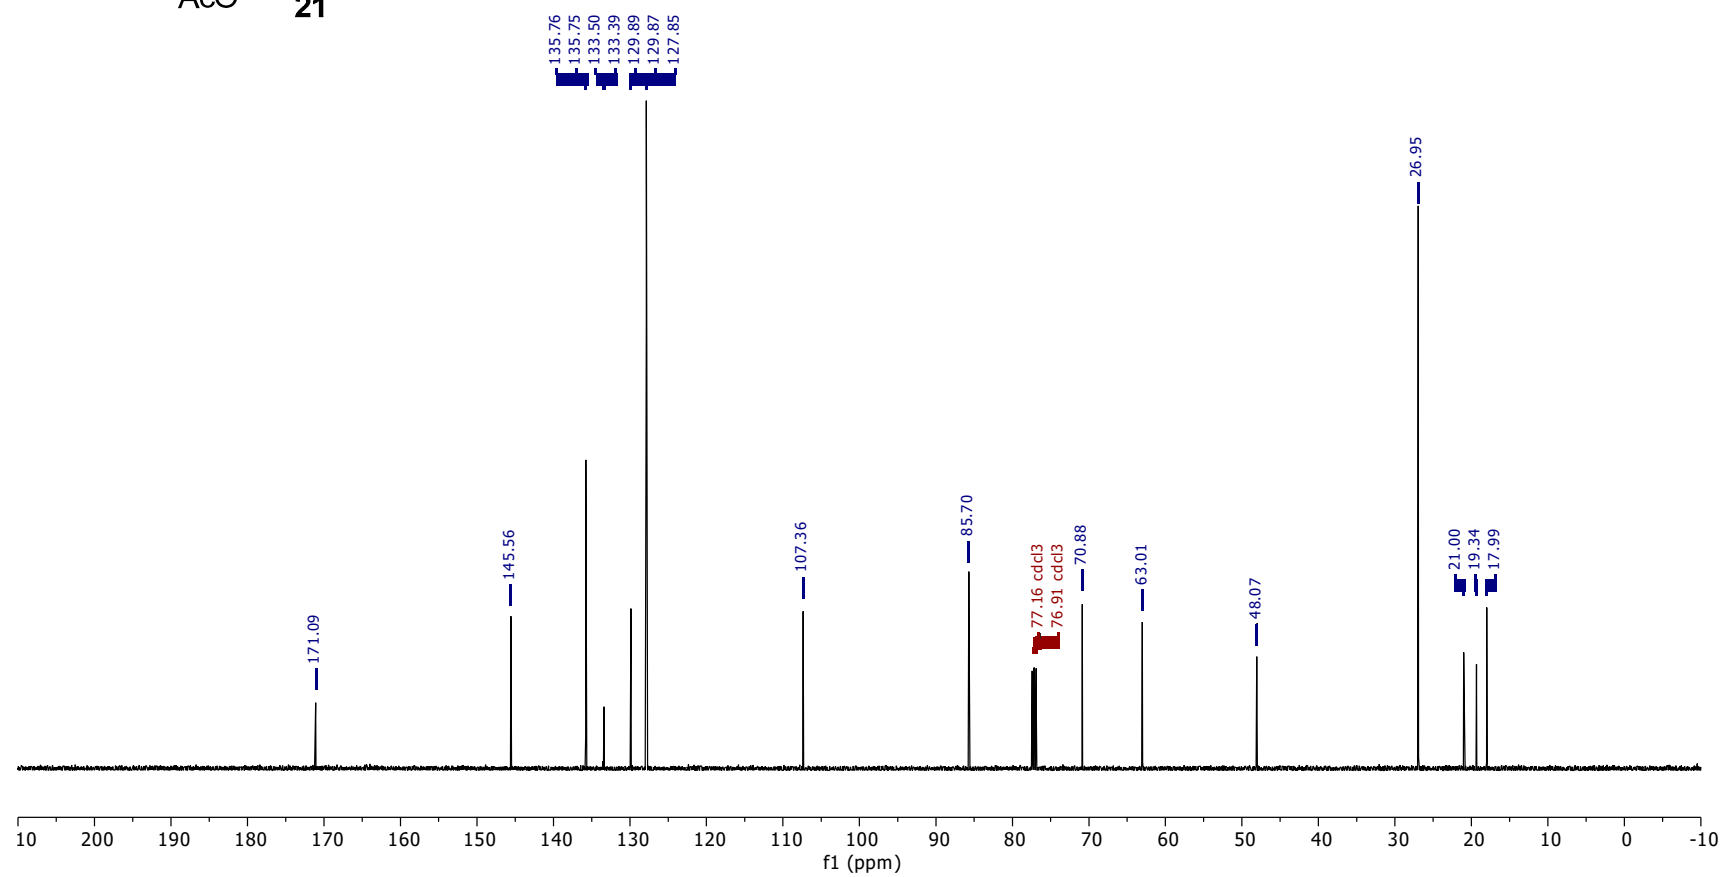





$^{13}\text{C}\{^1\text{H}\}$ -NMR (126 MHz,  $\text{CDCl}_3$ )

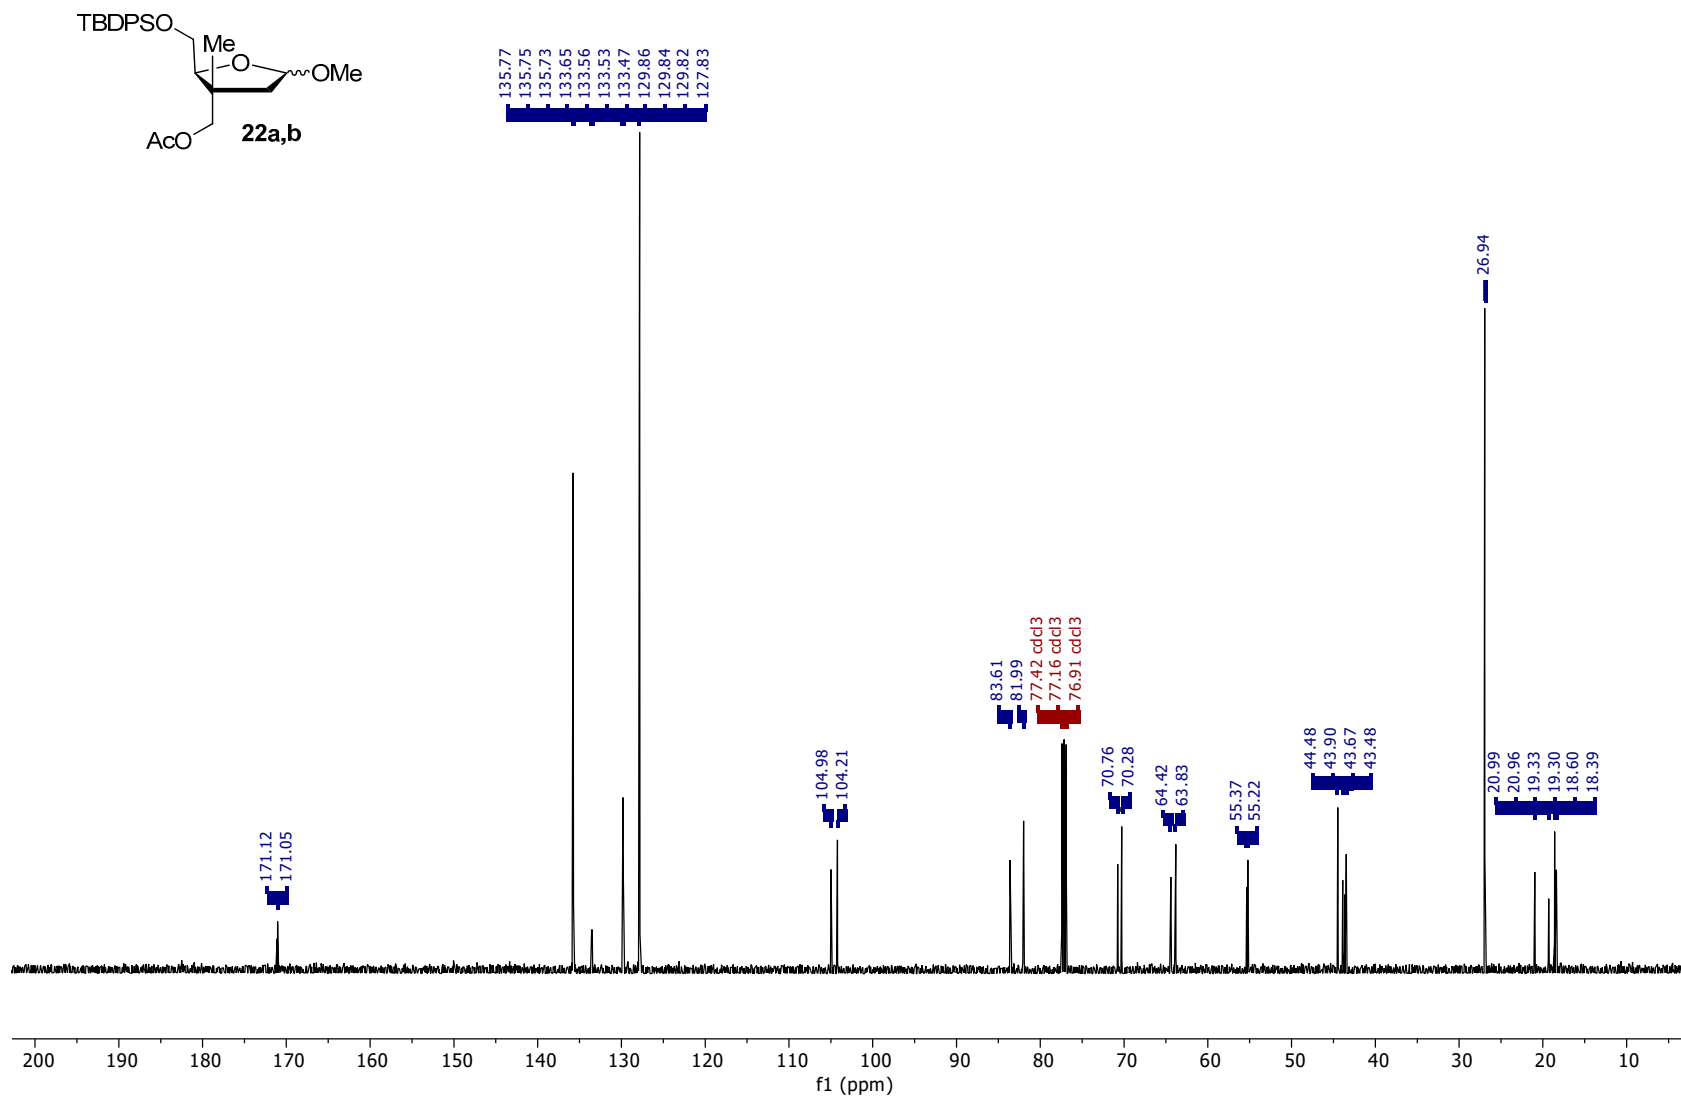

$^1\text{H}$ -NMR (500 MHz,  $\text{CDCl}_3$ )

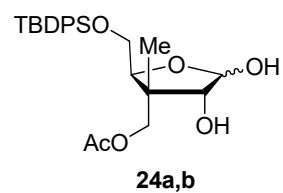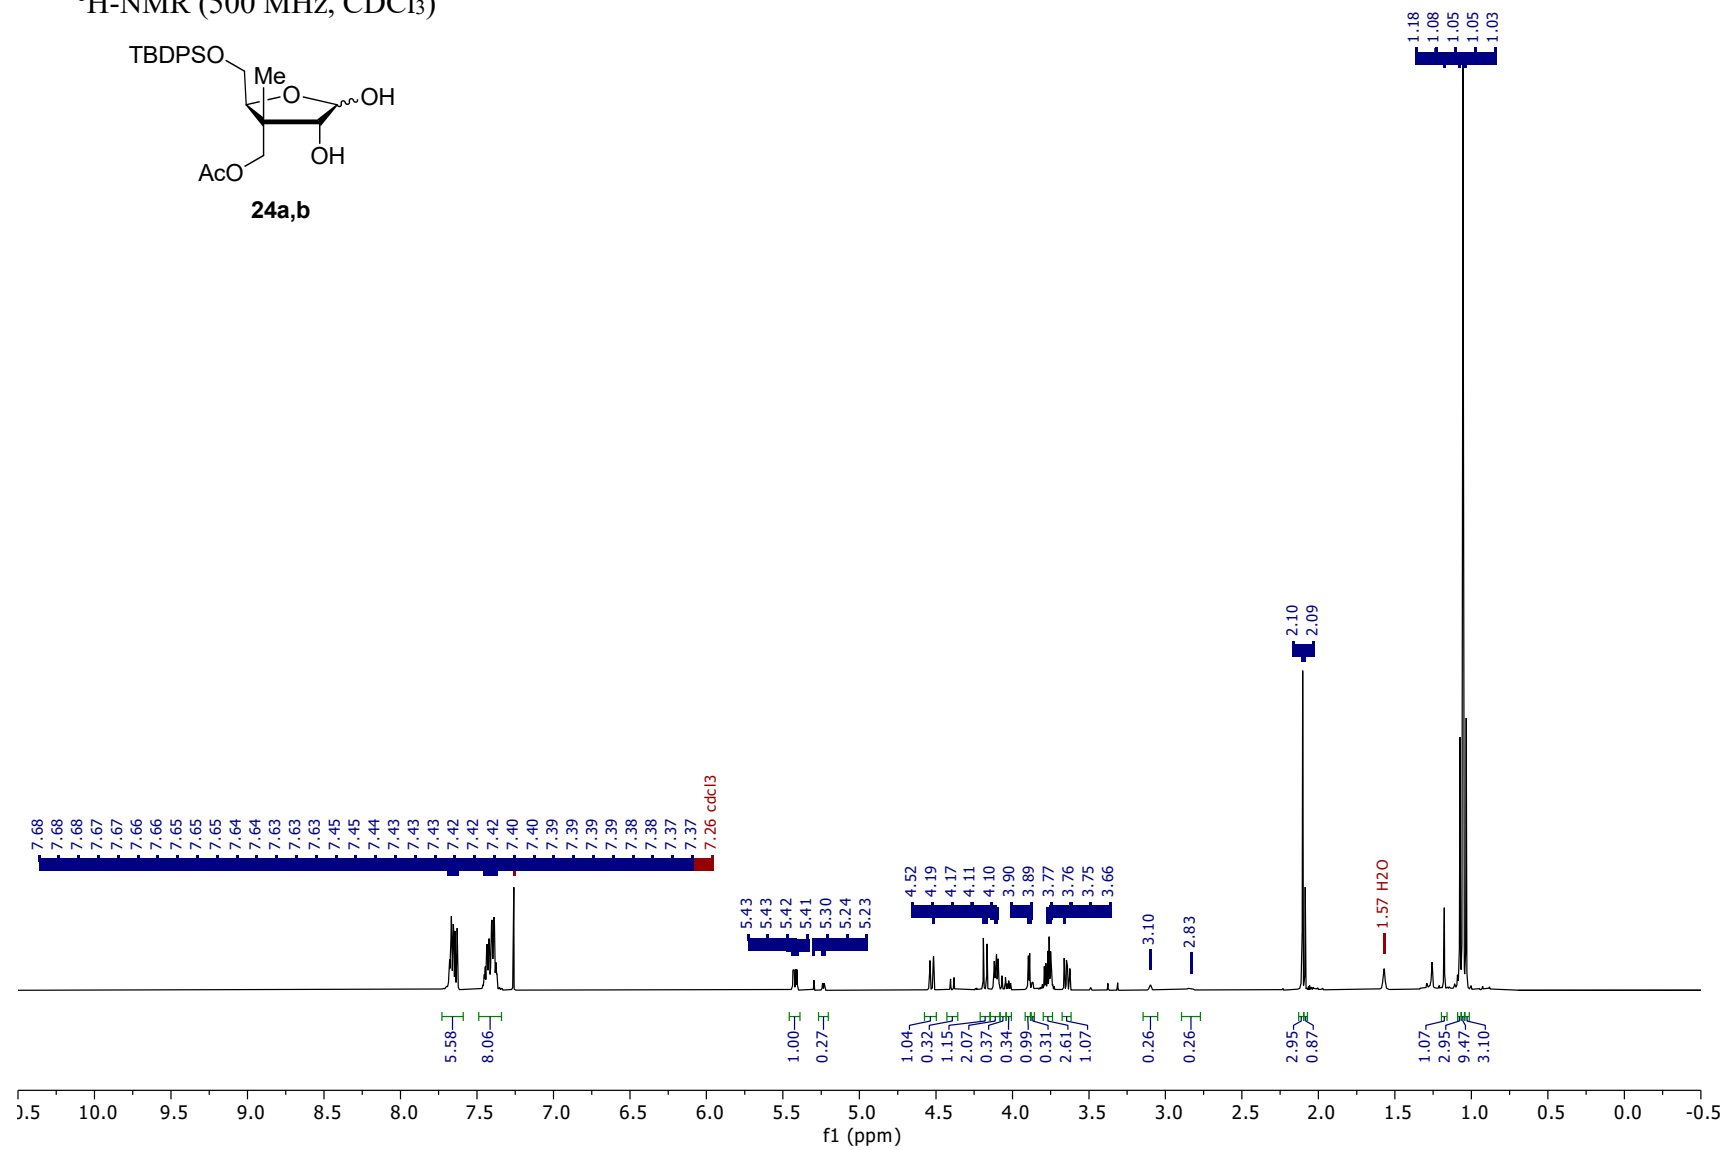

$^{13}\text{C}\{^1\text{H}\}$ -NMR (126 MHz,  $\text{CDCl}_3$ )

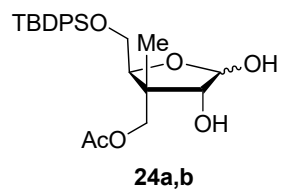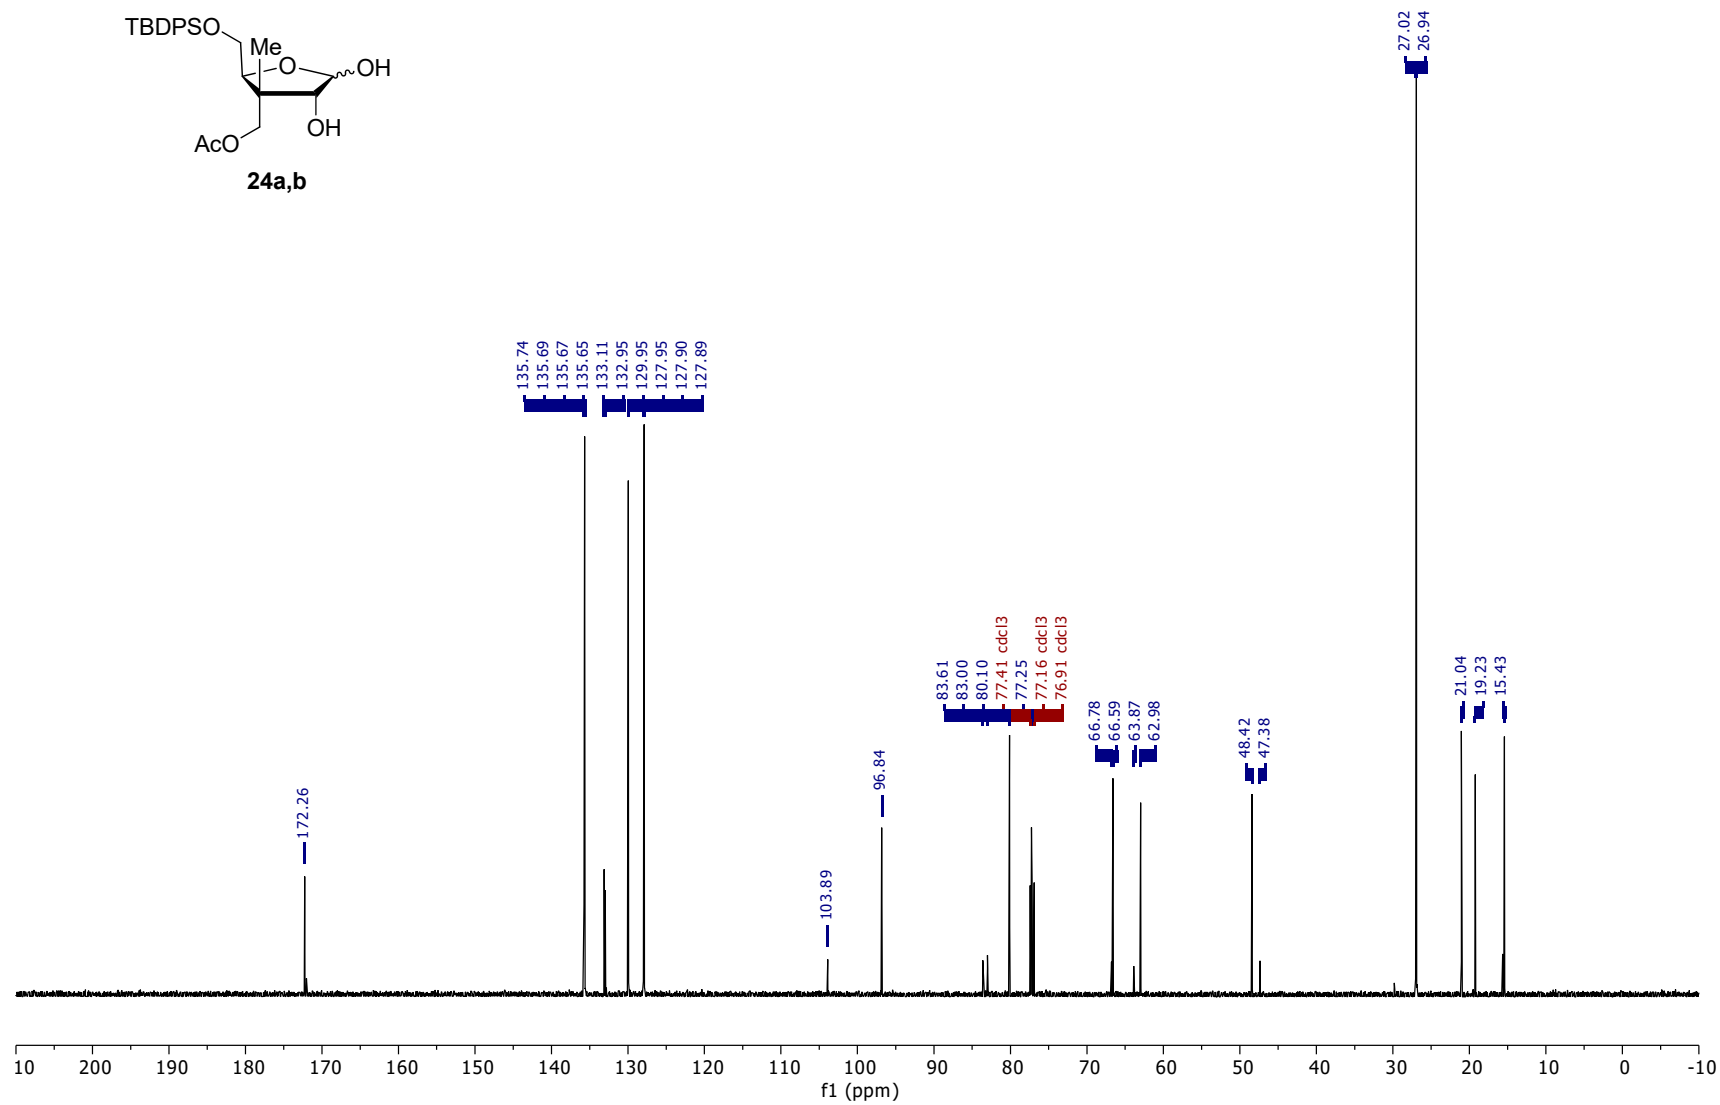

$^1\text{H}$ -NMR (500 MHz,  $\text{CDCl}_3$ )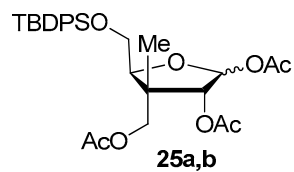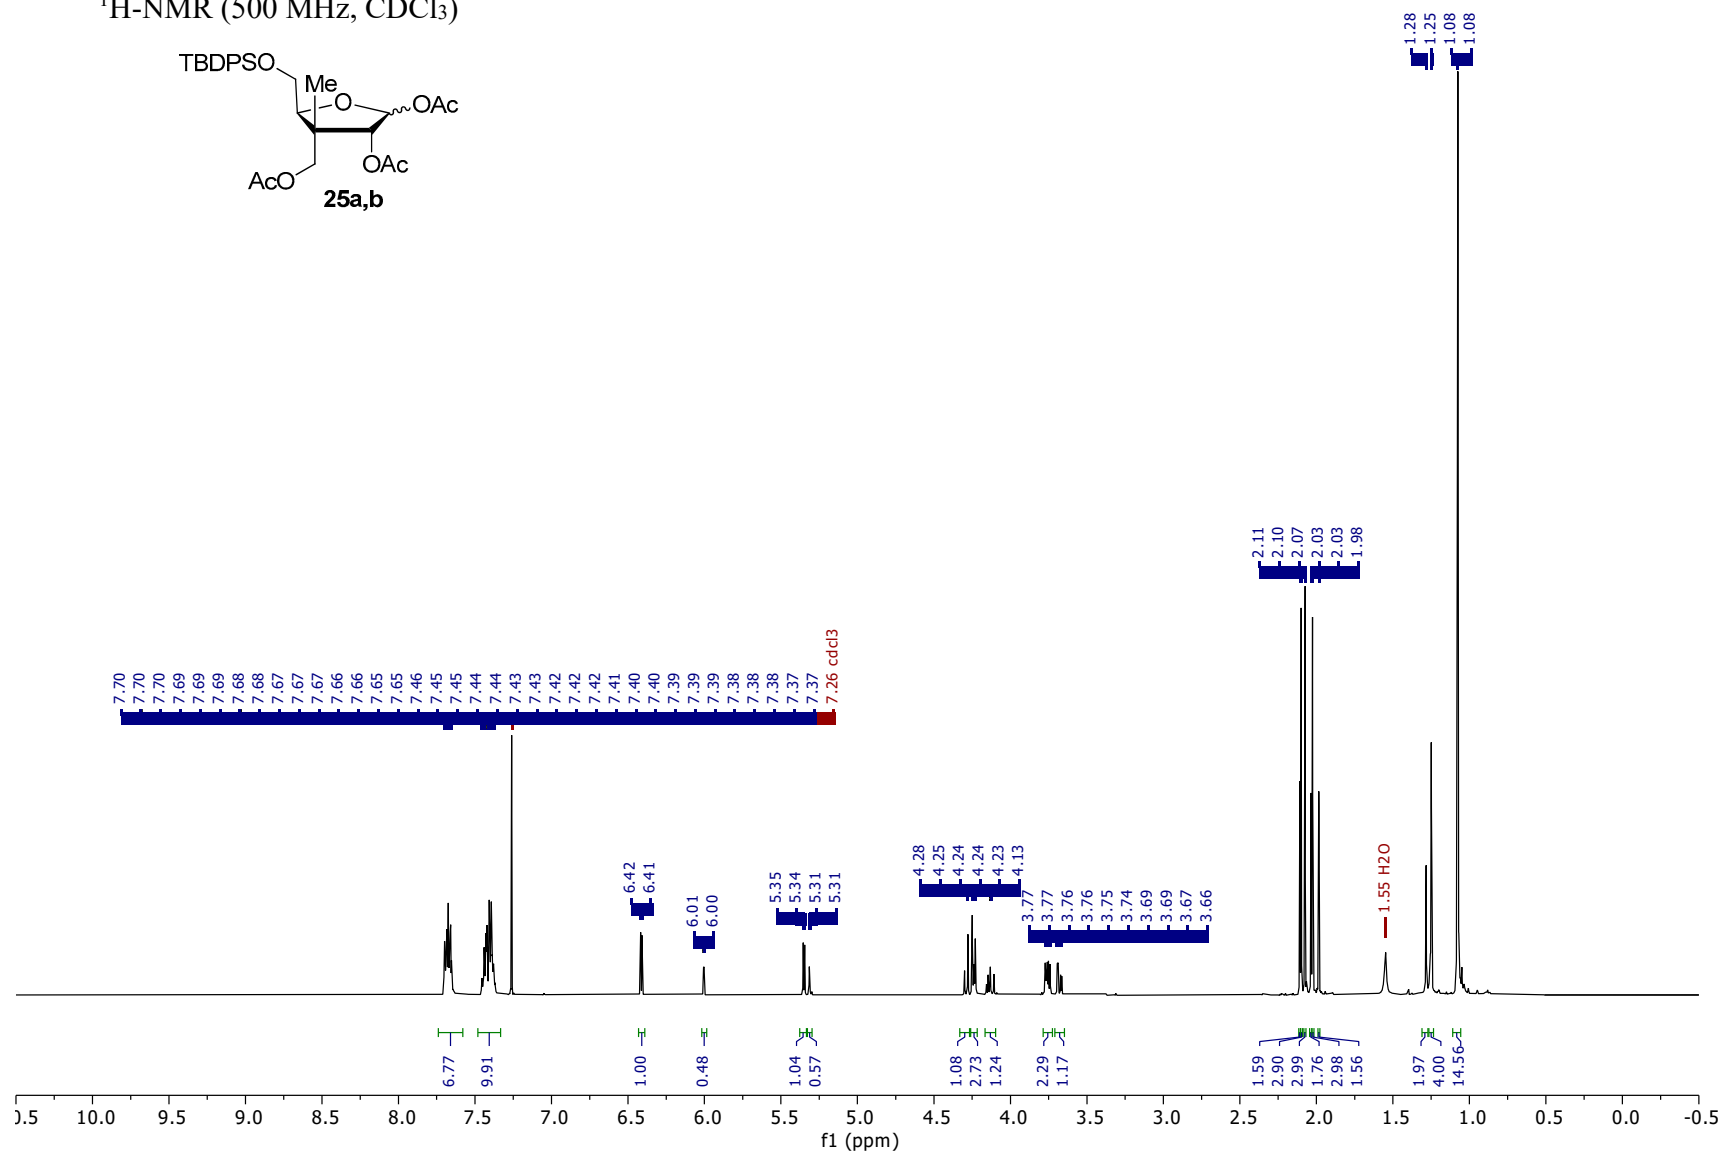

$^{13}\text{C}\{^1\text{H}\}$ -NMR (126 MHz,  $\text{CDCl}_3$ )

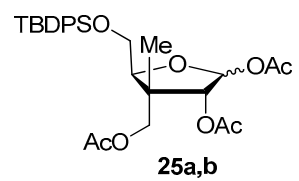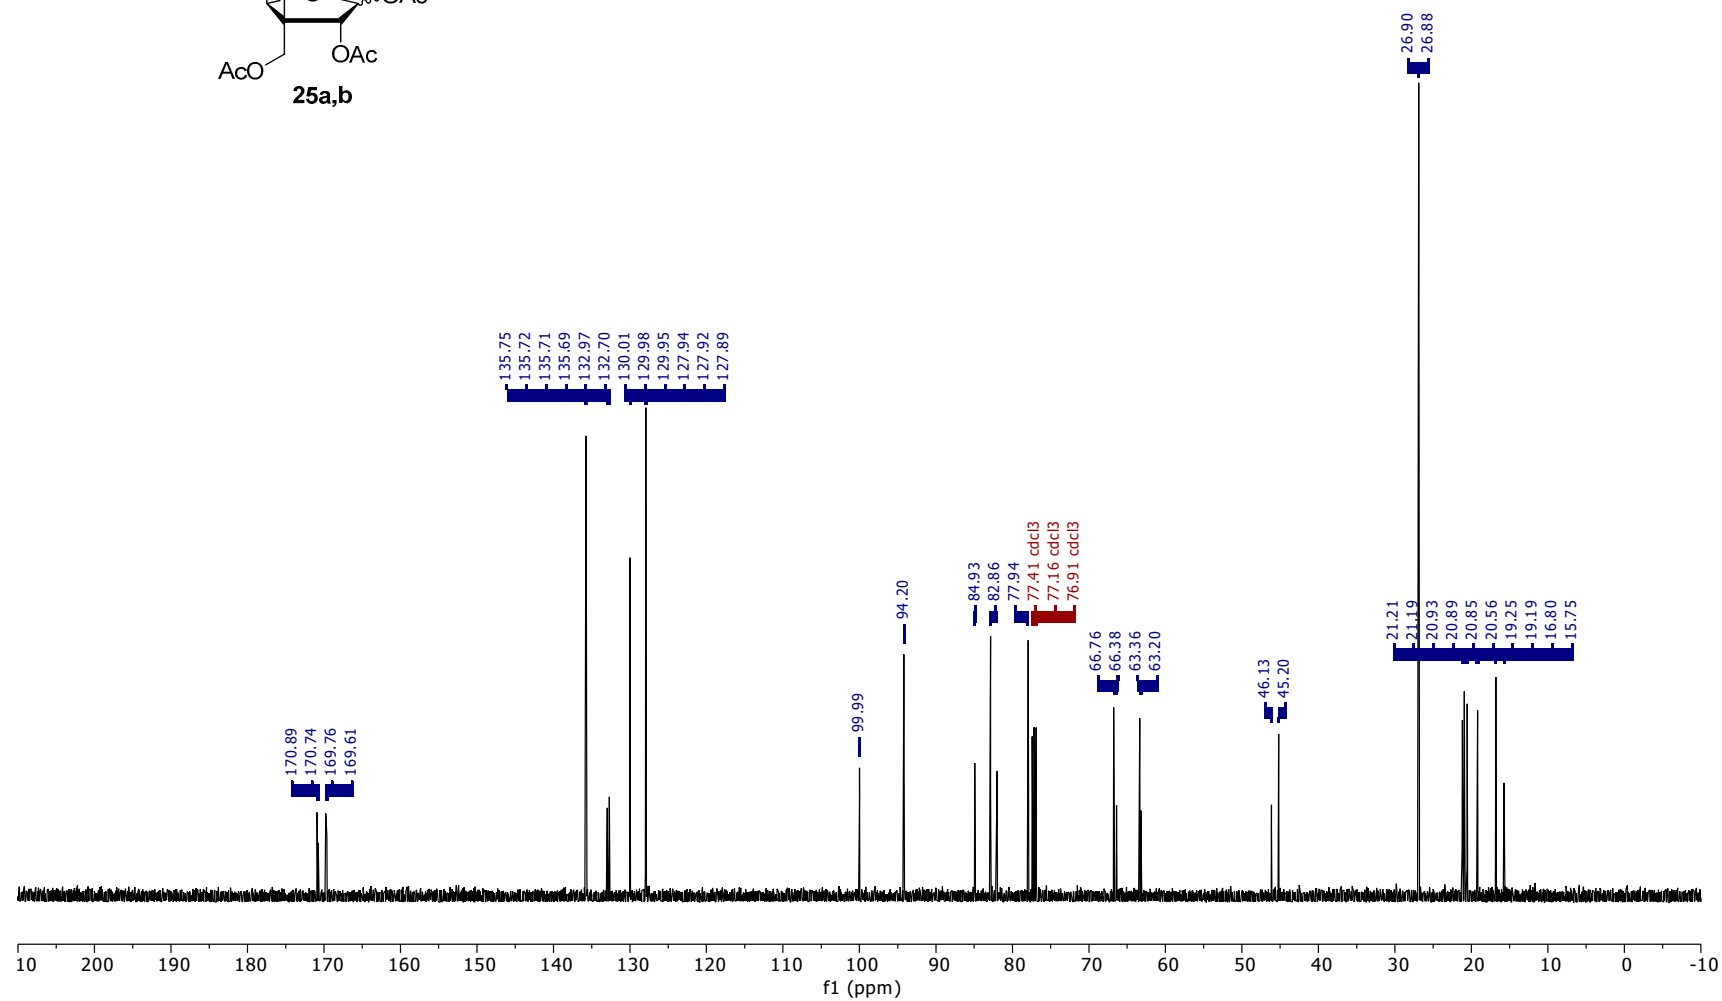

<sup>1</sup>H-NMR (500 MHz, CD<sub>3</sub>OD)

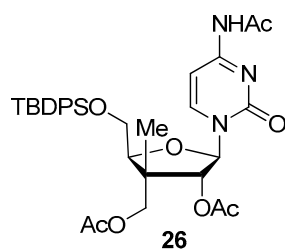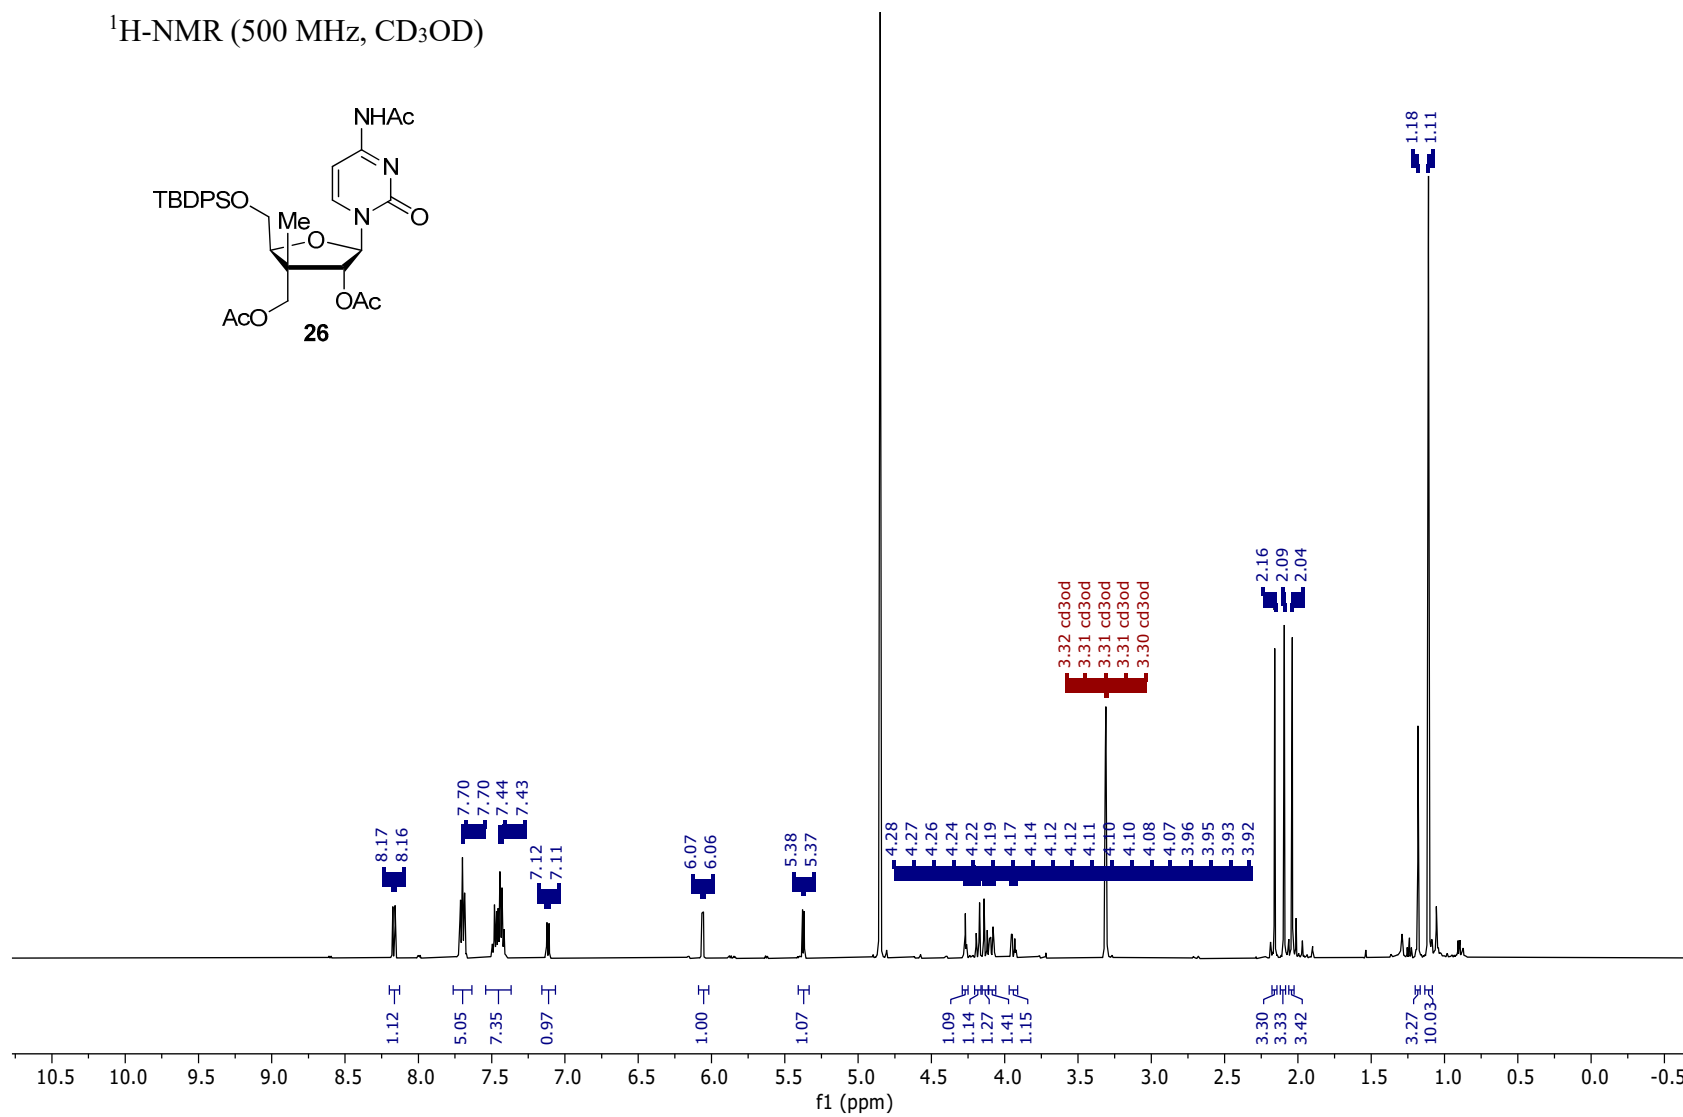

$^{13}\text{C}\{^1\text{H}\}$ -NMR (126 MHz,  $\text{CD}_3\text{OD}$ )

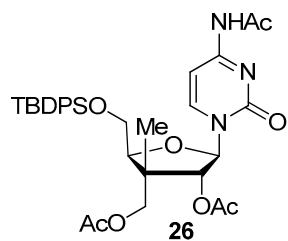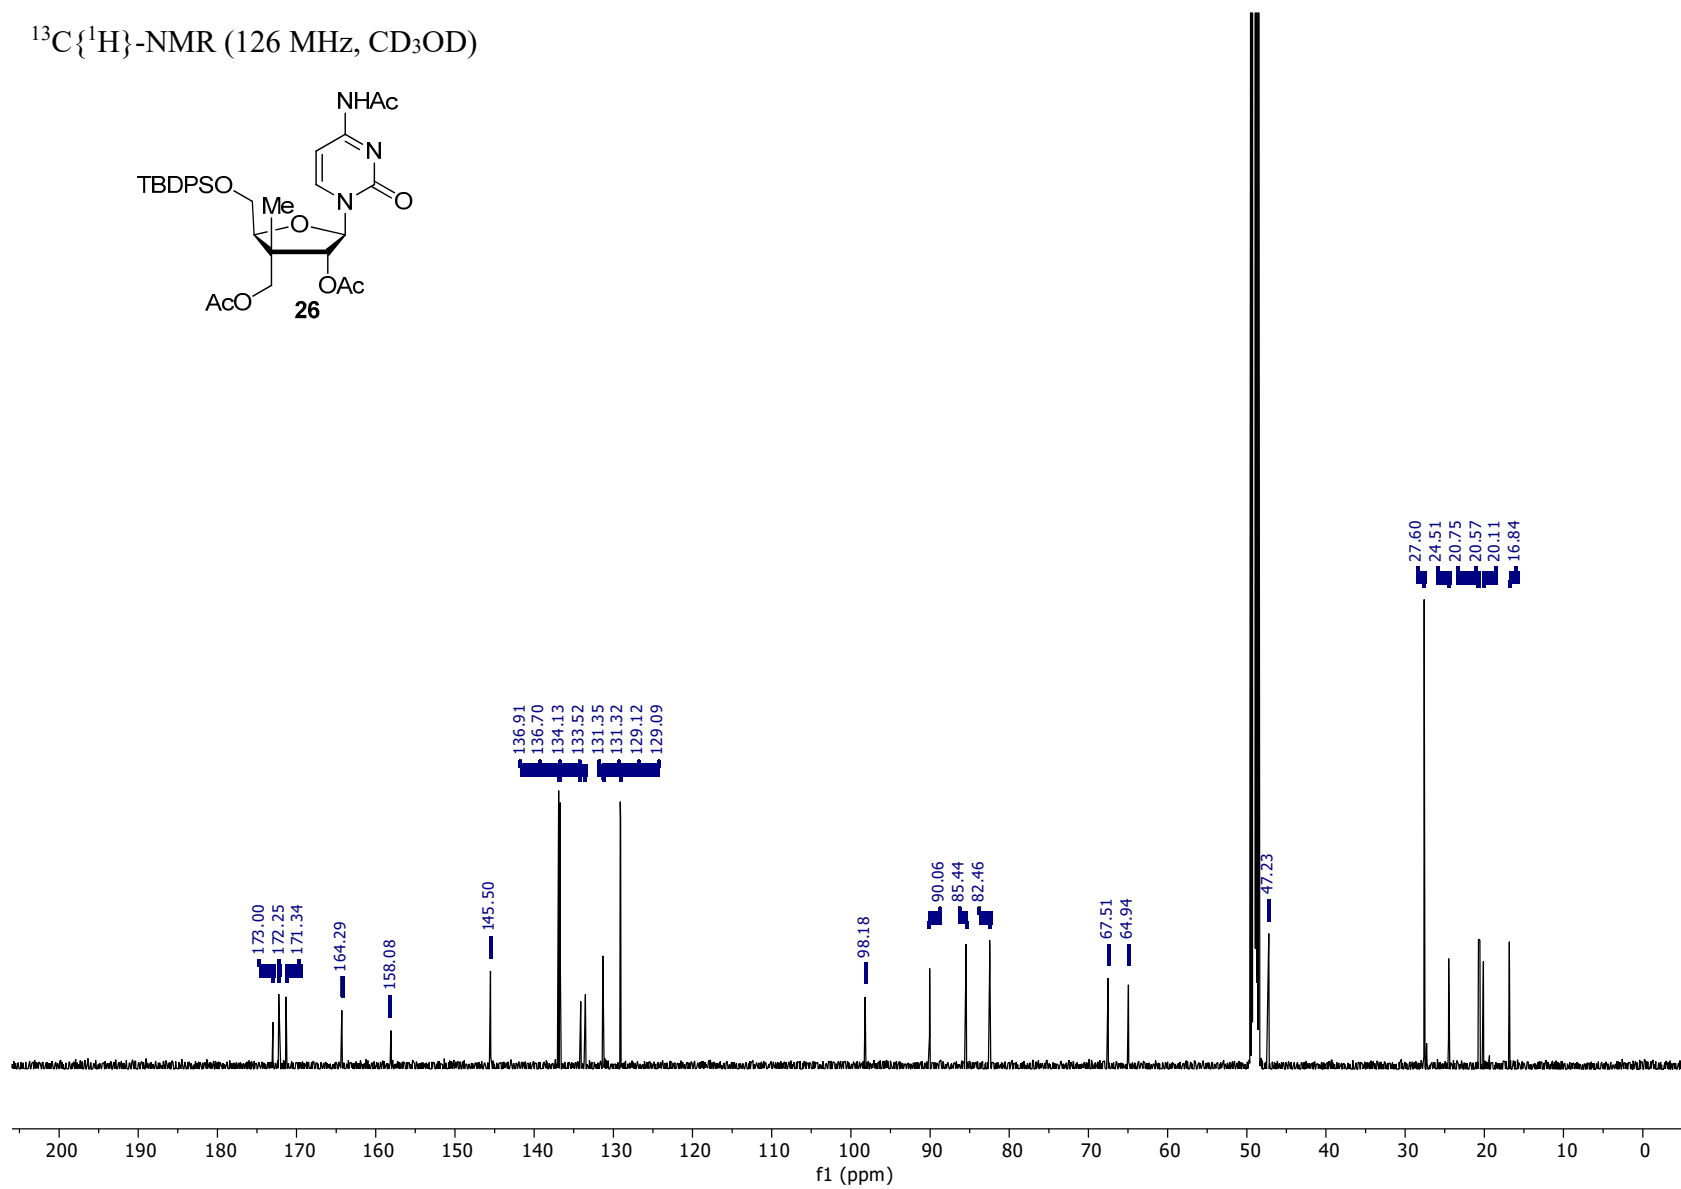

NOESY (500 MHz, CD<sub>3</sub>OD)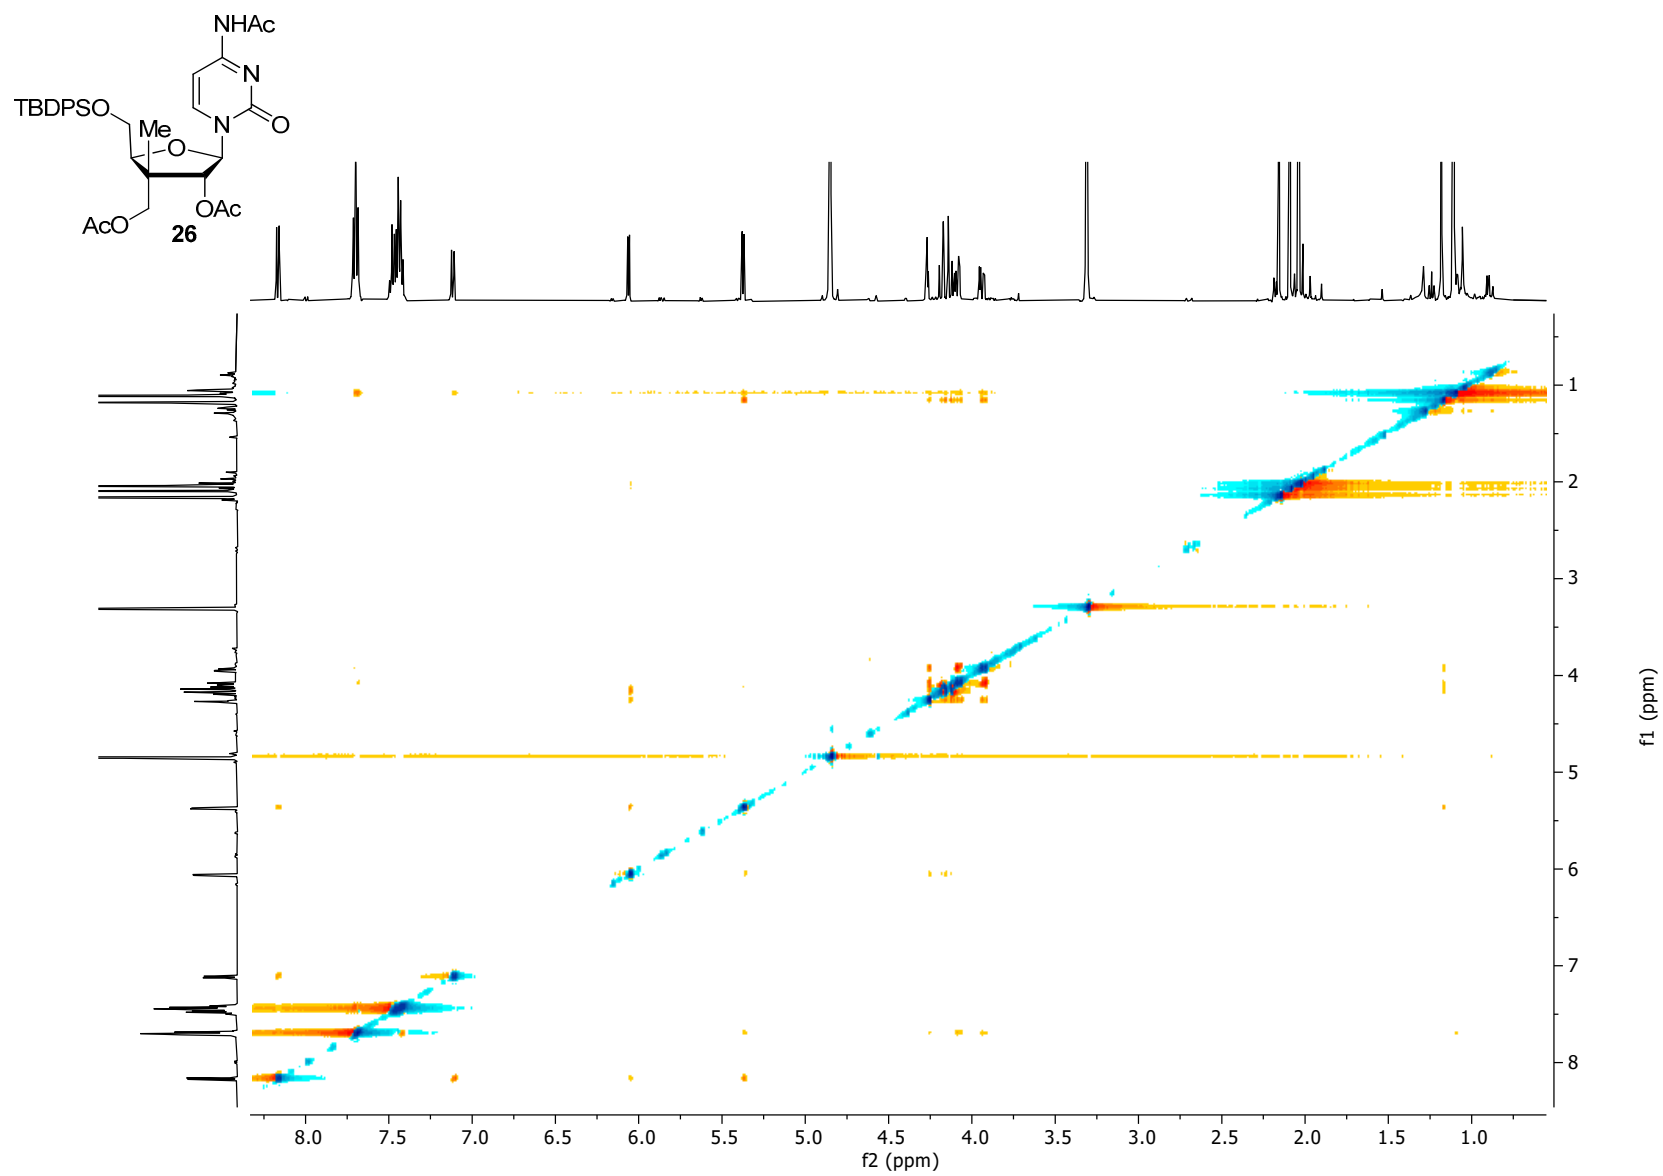



$^1\text{H}$ -NMR (500 MHz,  $\text{CD}_3\text{OD}$ )

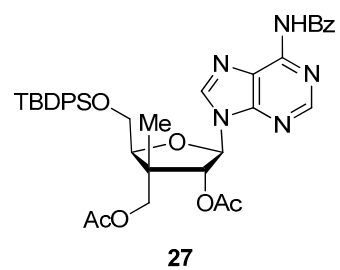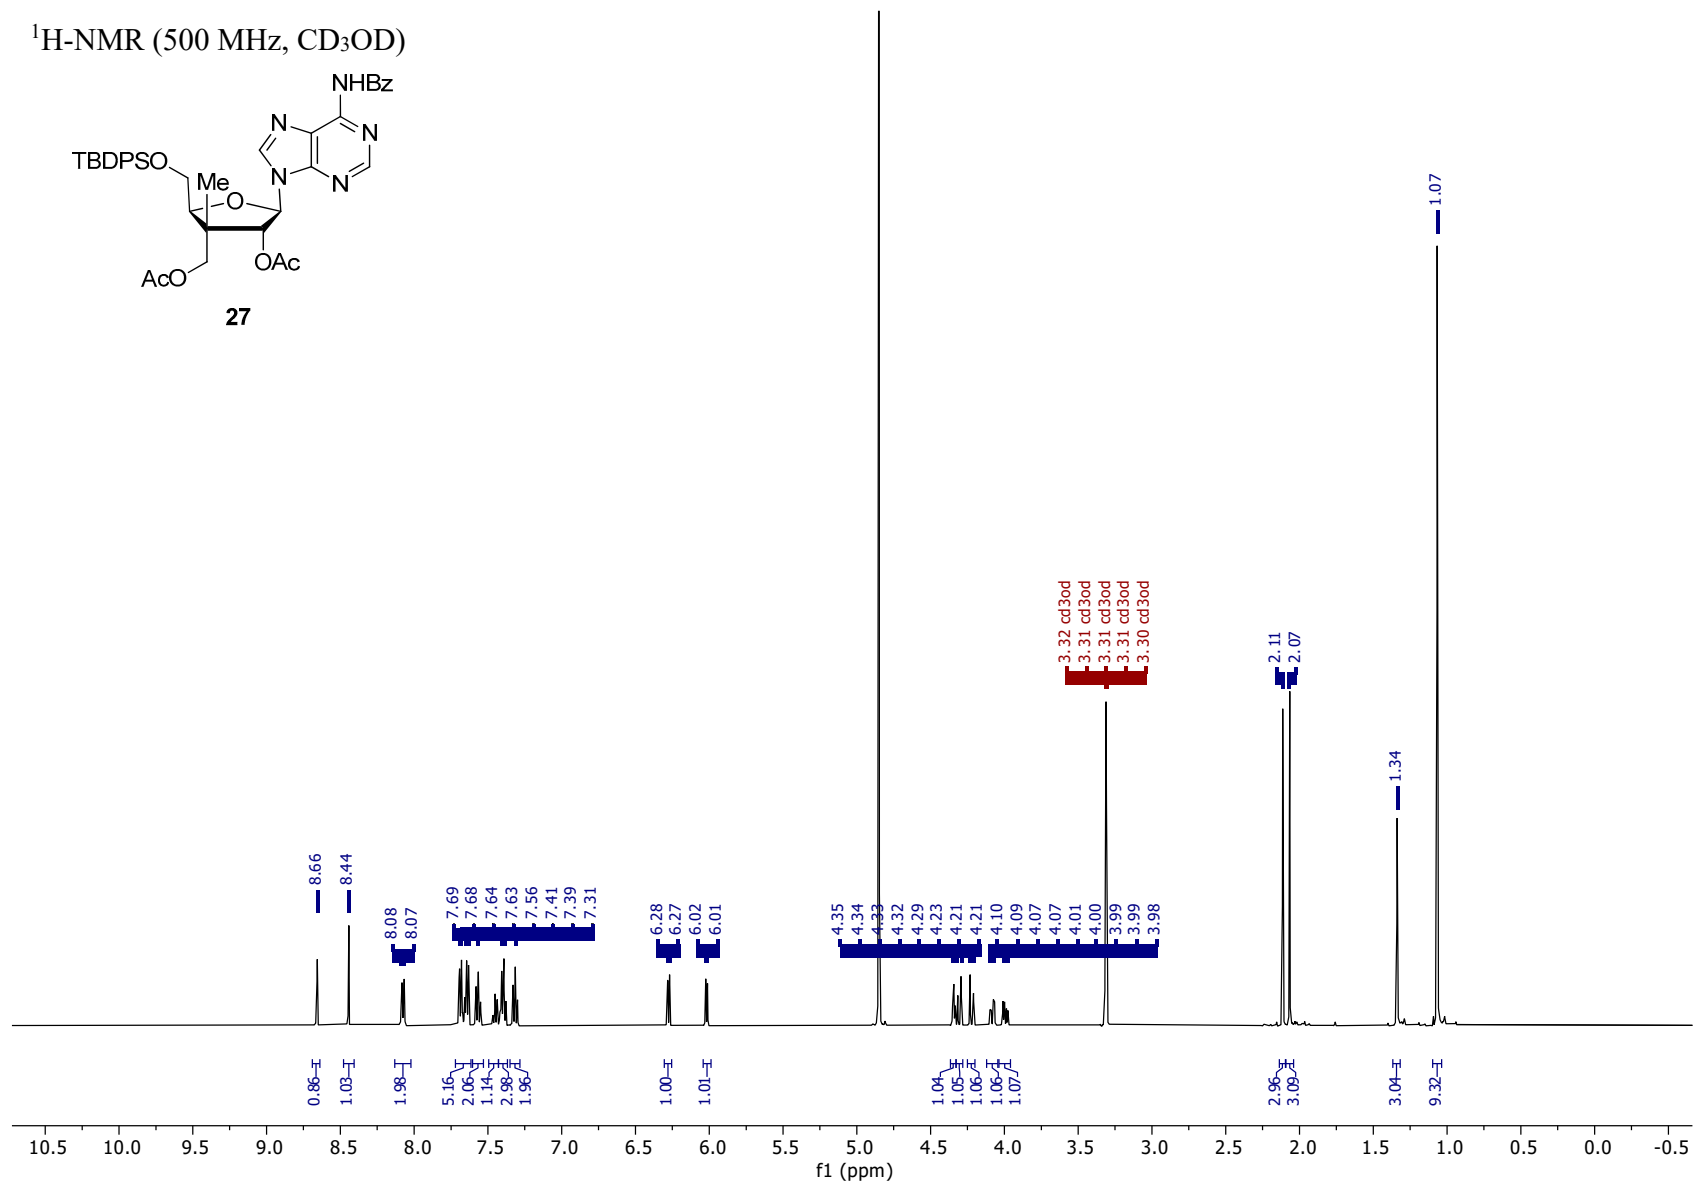

$^{13}\text{C}\{^1\text{H}\}$ -NMR (126 MHz,  $\text{CD}_3\text{OD}$ )

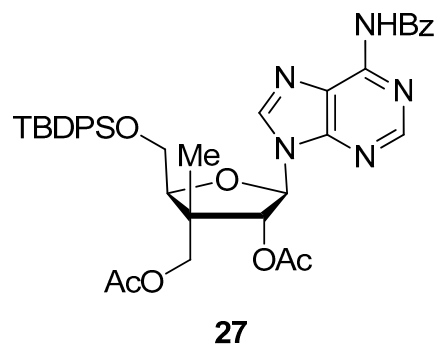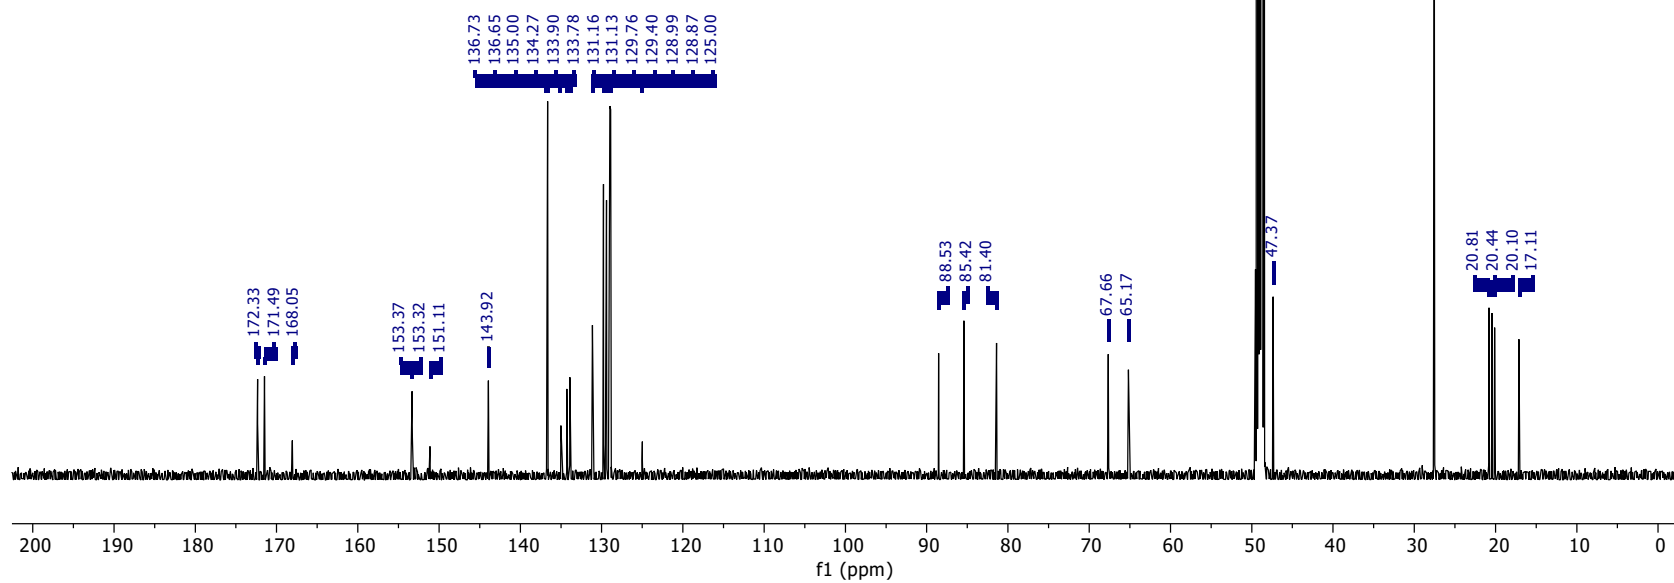

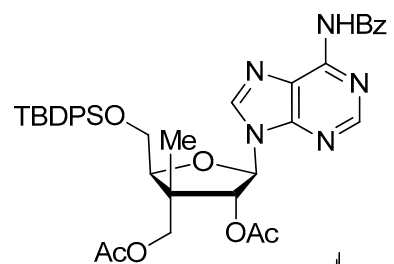

27

NOESY (500 MHz, CD<sub>3</sub>OD)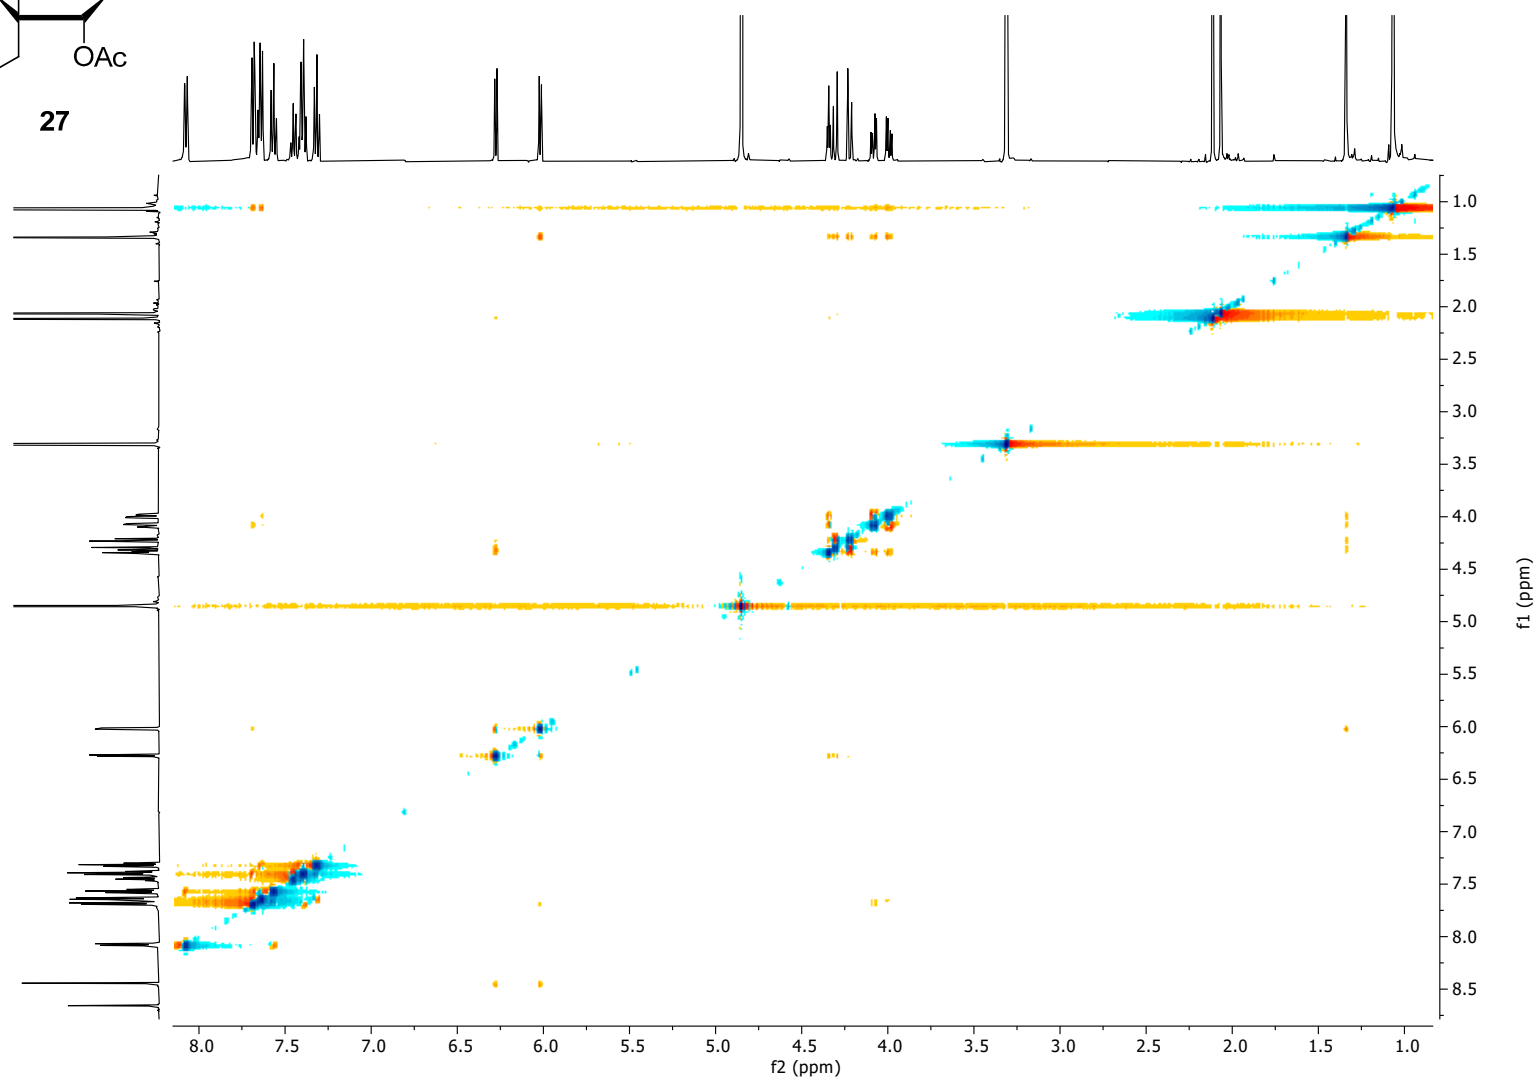

$^1\text{H}$ -NMR (500 MHz,  $\text{CD}_3\text{OD}$ )

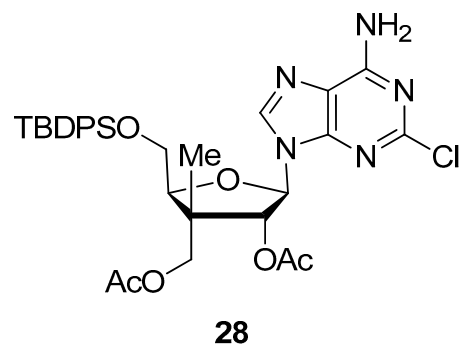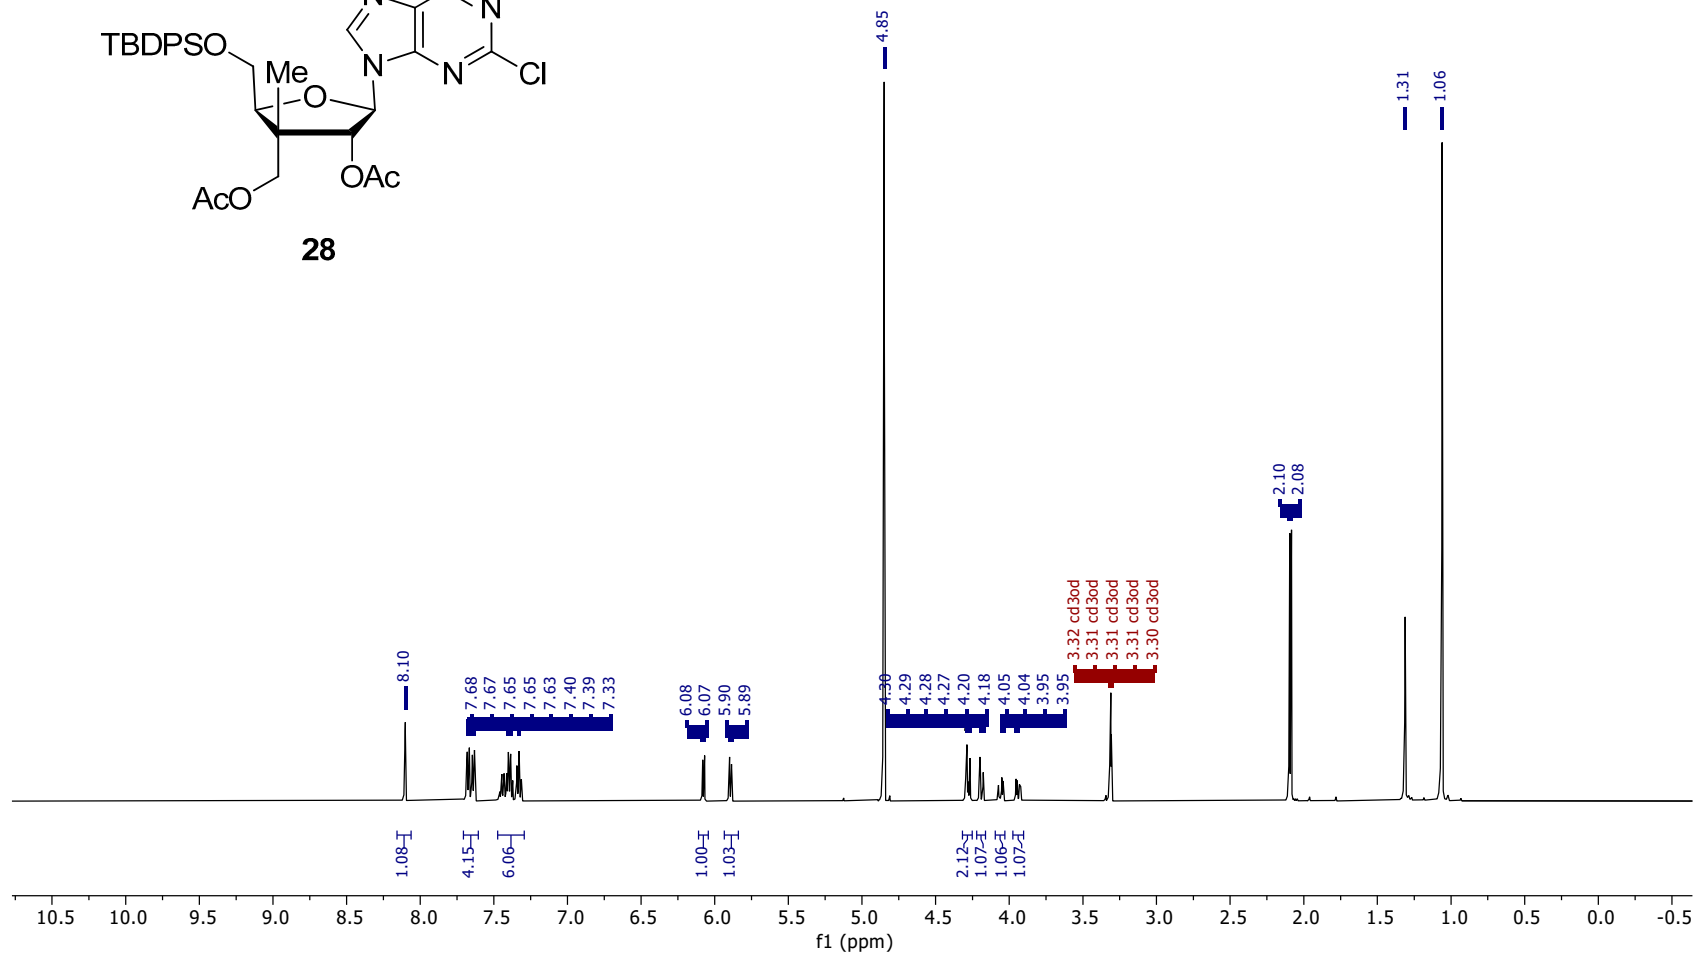

$^{13}\text{C}\{^1\text{H}\}$ -NMR (126 MHz,  $\text{CD}_3\text{OD}$ )

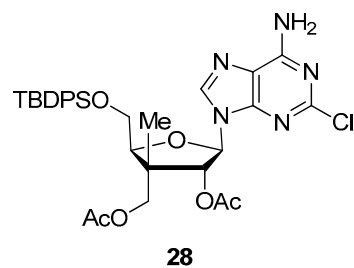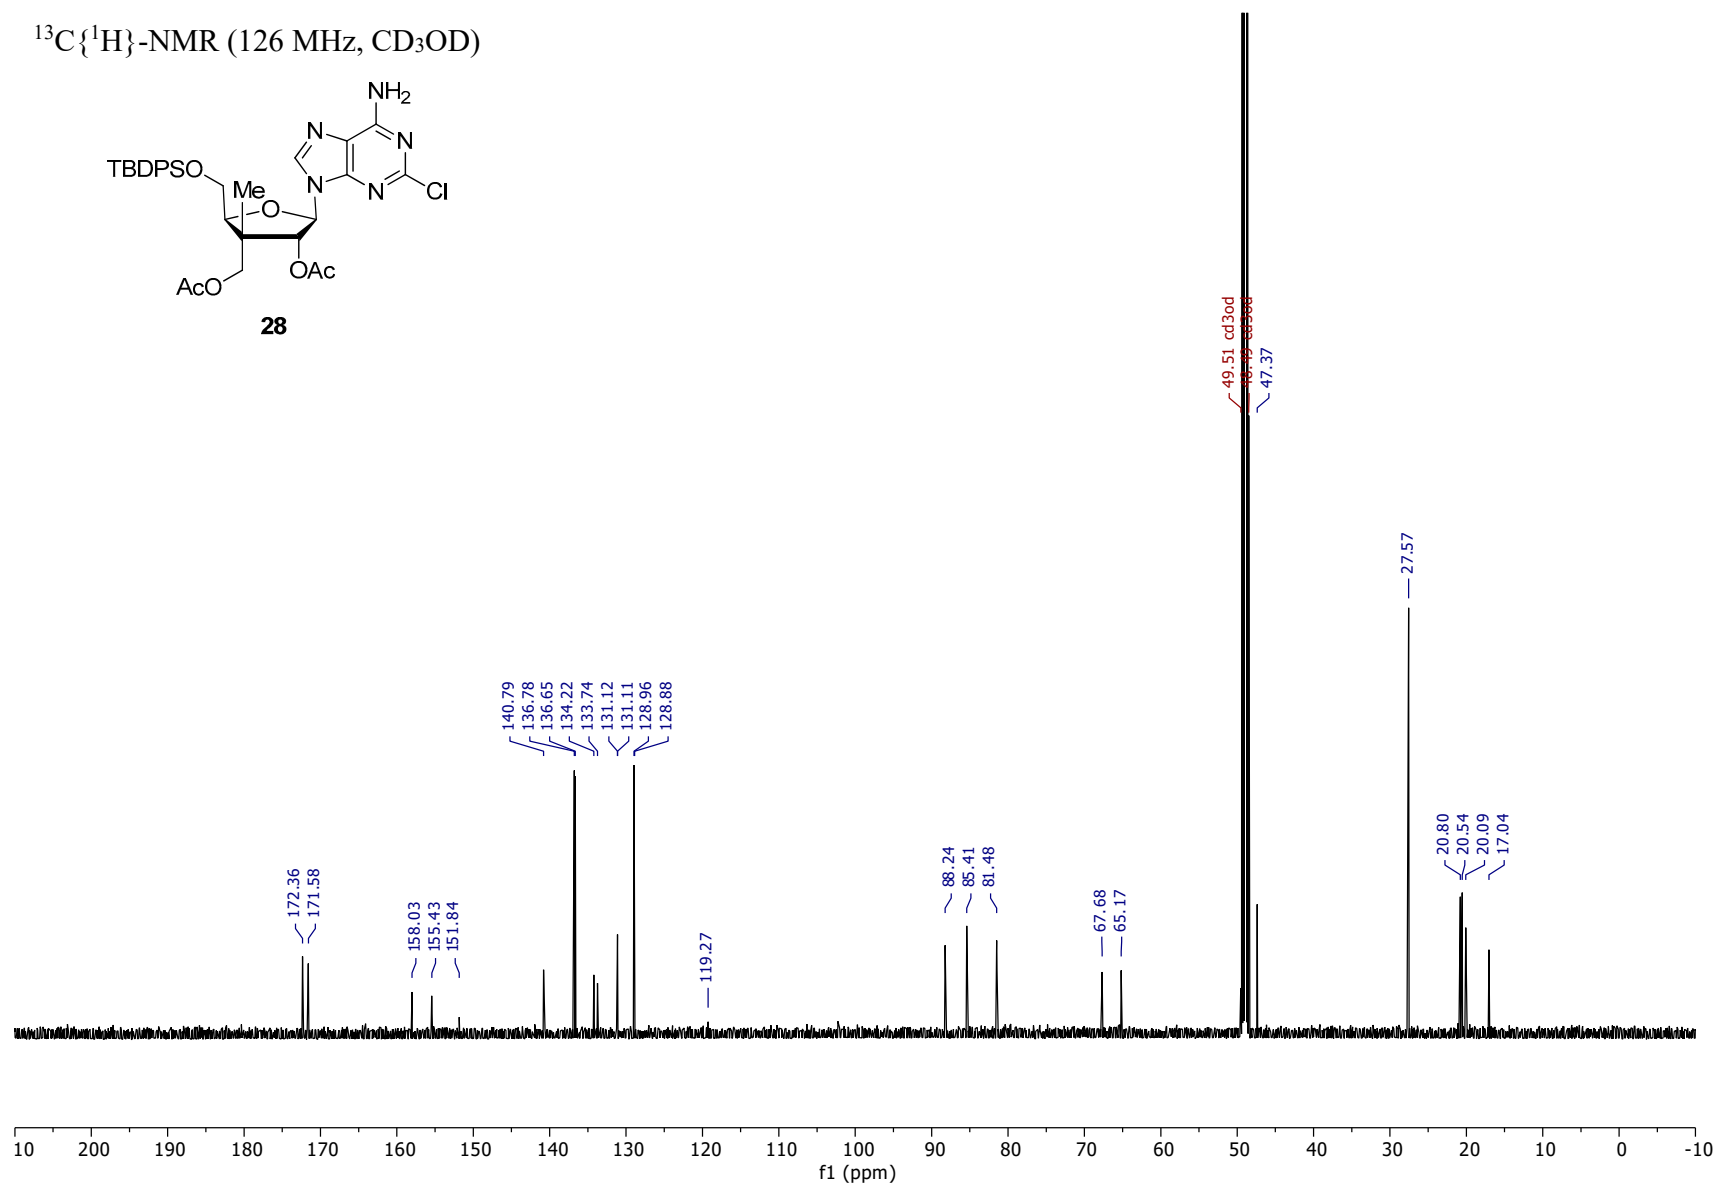

NOESY (500 MHz, CD<sub>3</sub>OD)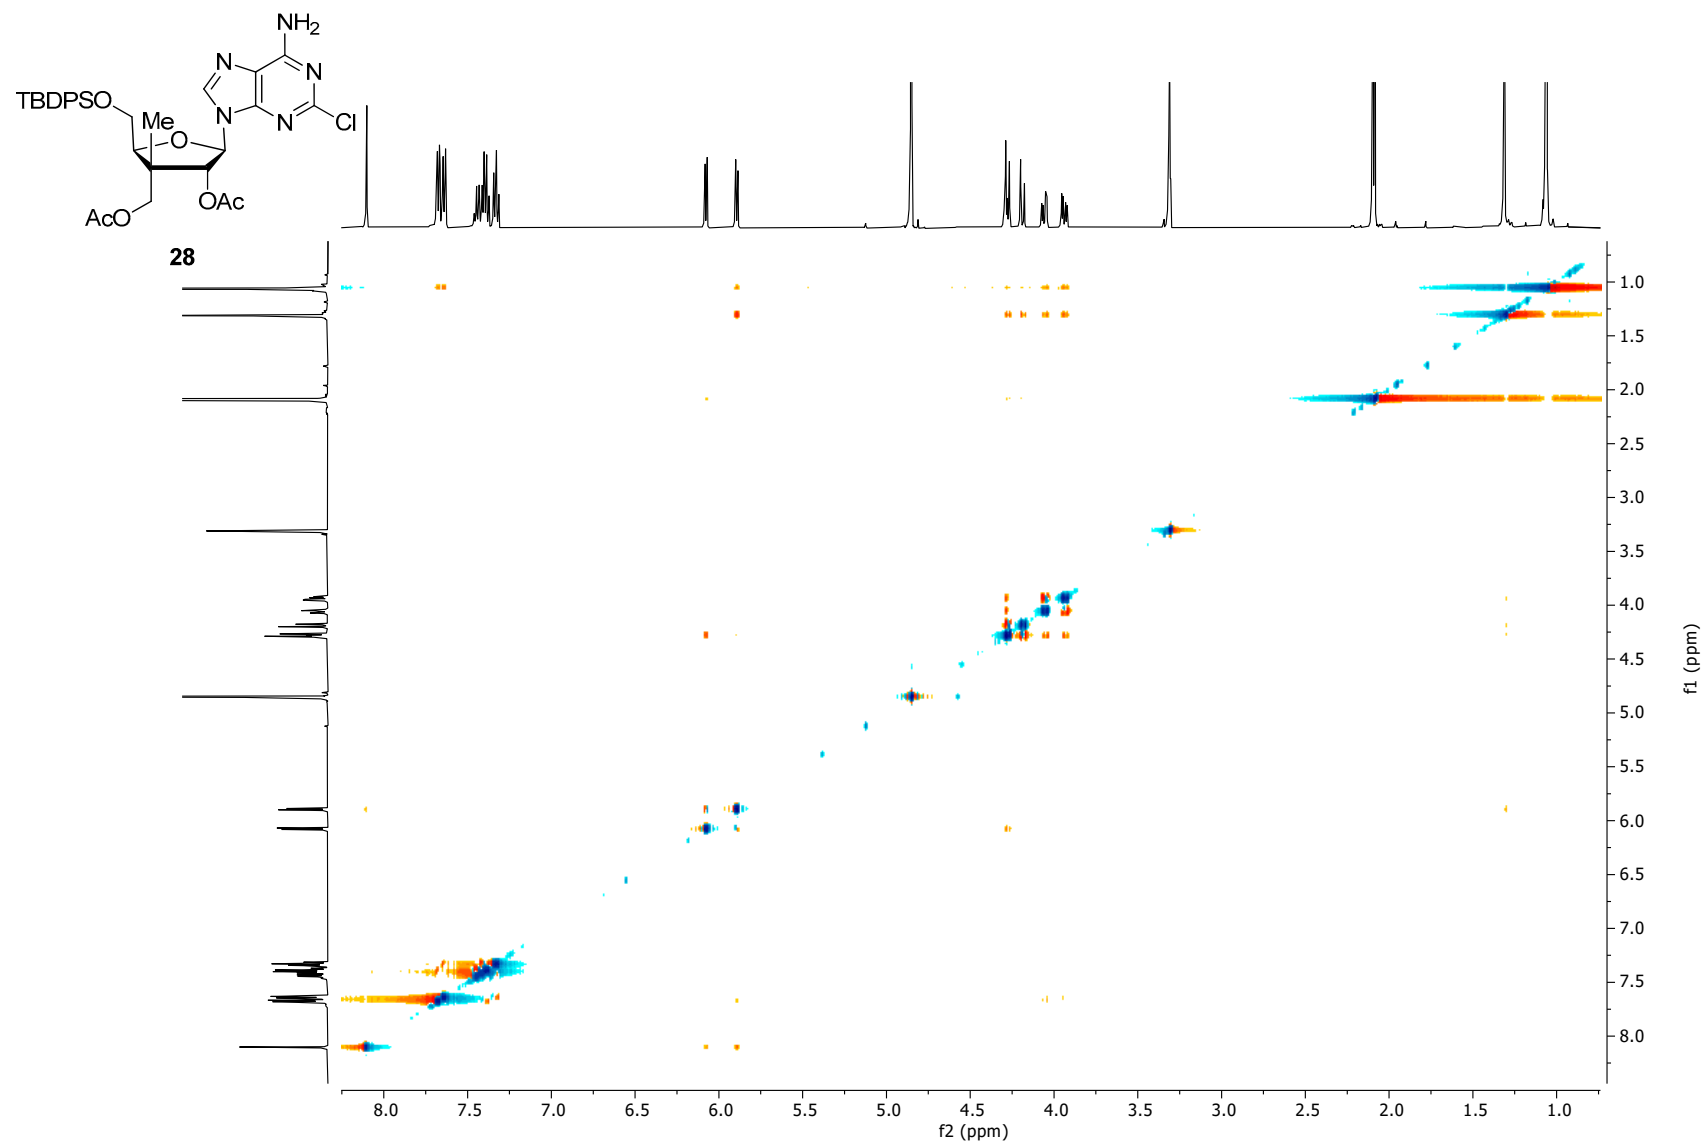

<sup>1</sup>H-NMR (500 MHz, CD<sub>3</sub>OD)

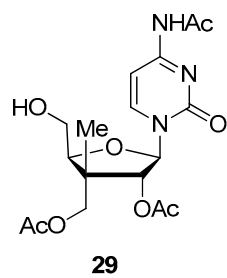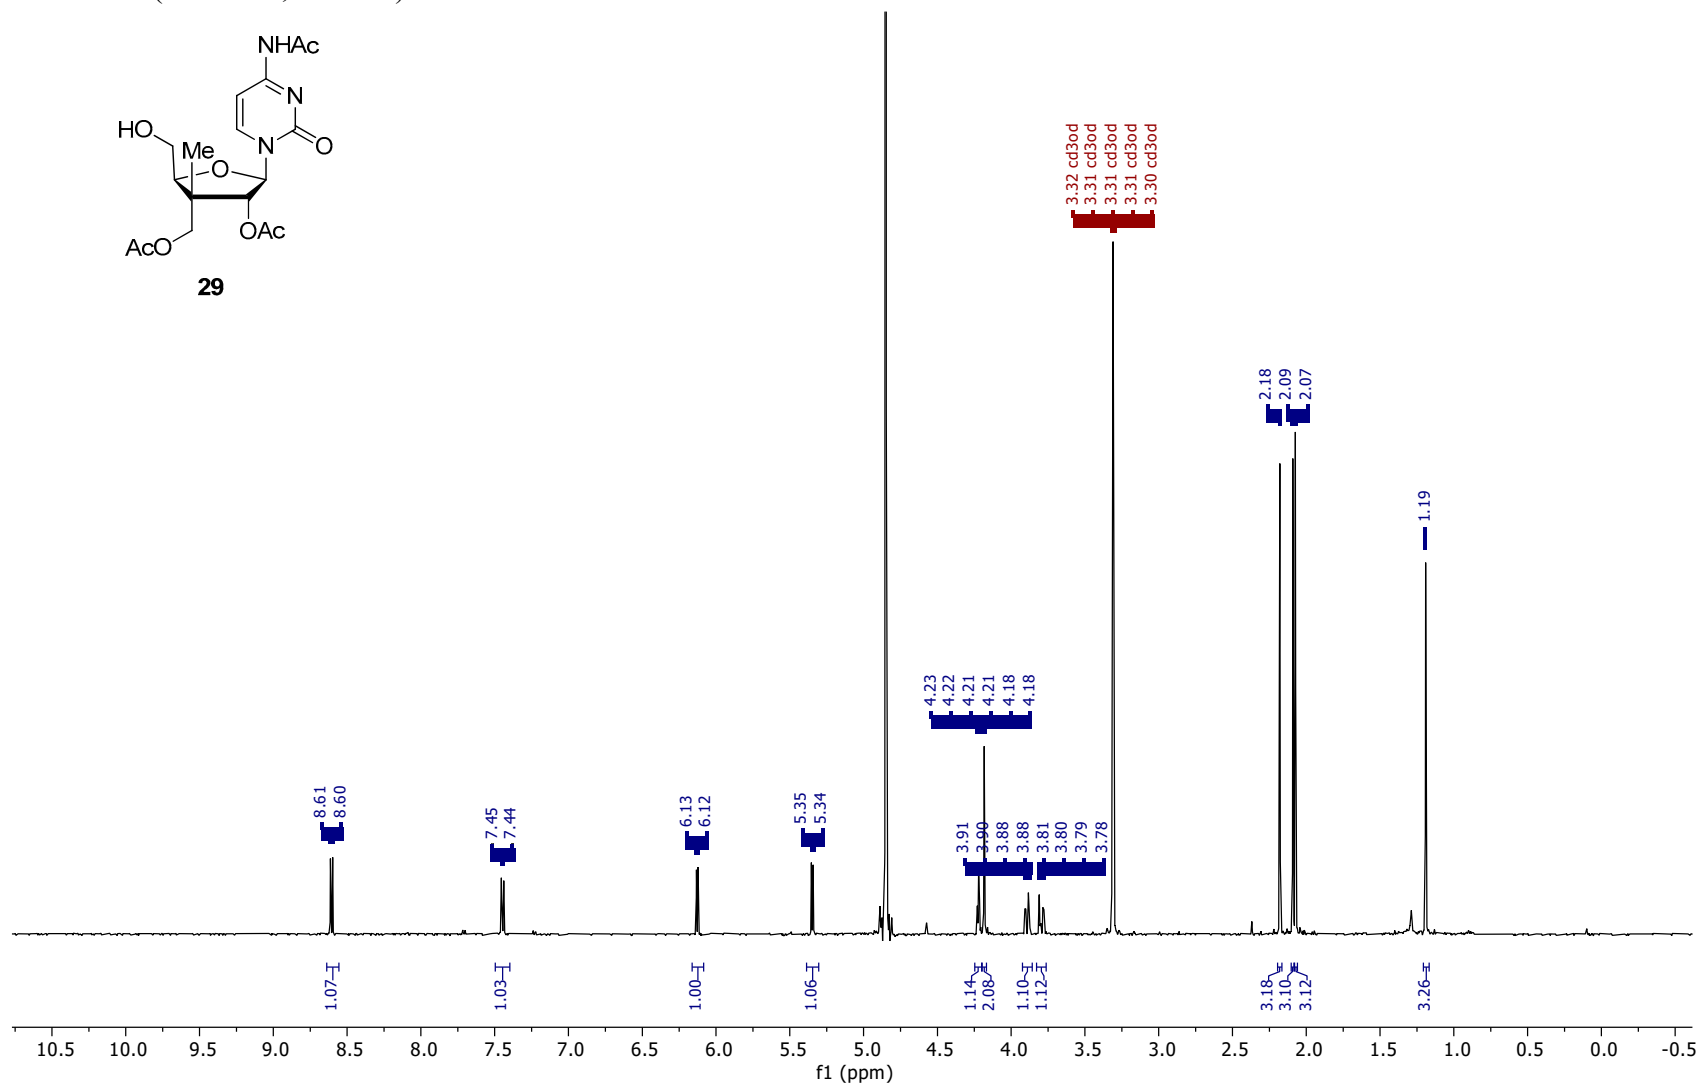

$^{13}\text{C}\{^1\text{H}\}$ -NMR (126 MHz,  $\text{CD}_3\text{OD}$ )

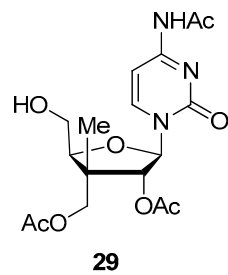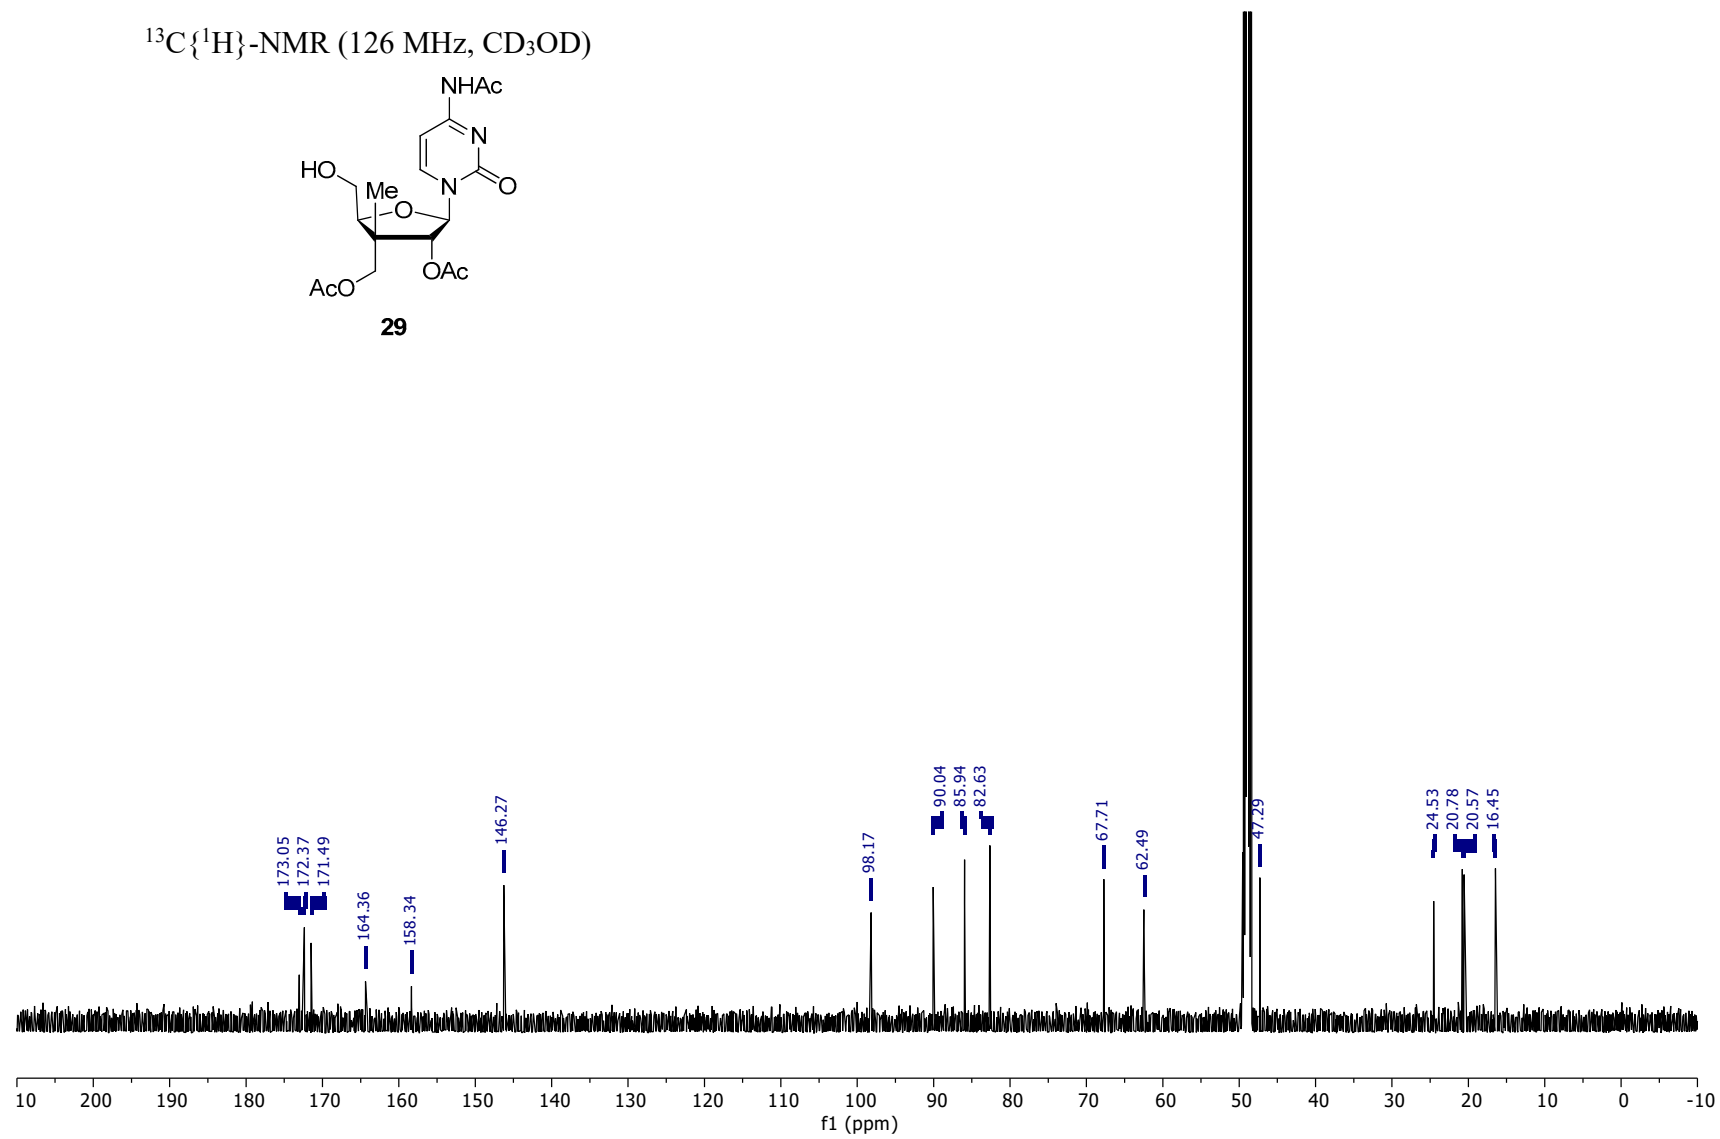



NOESY (500 MHz, CD<sub>3</sub>OD)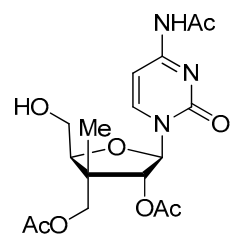

29

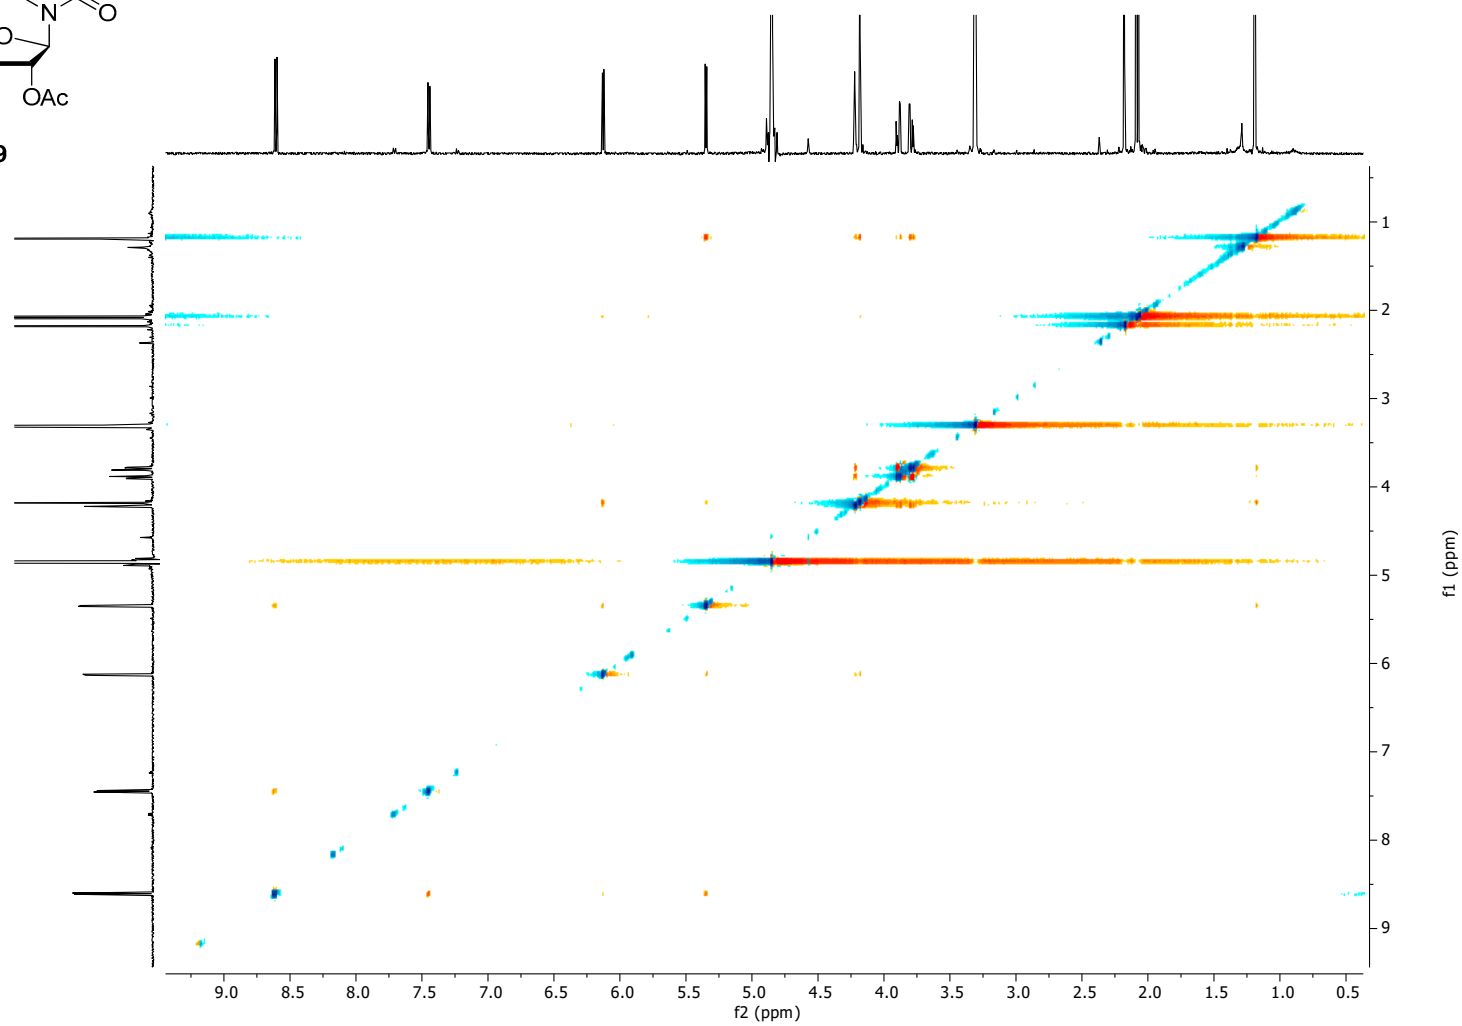

$^1\text{H}$ -NMR (500 MHz,  $\text{CD}_3\text{OD}$ )

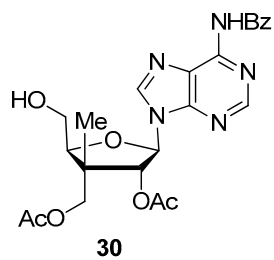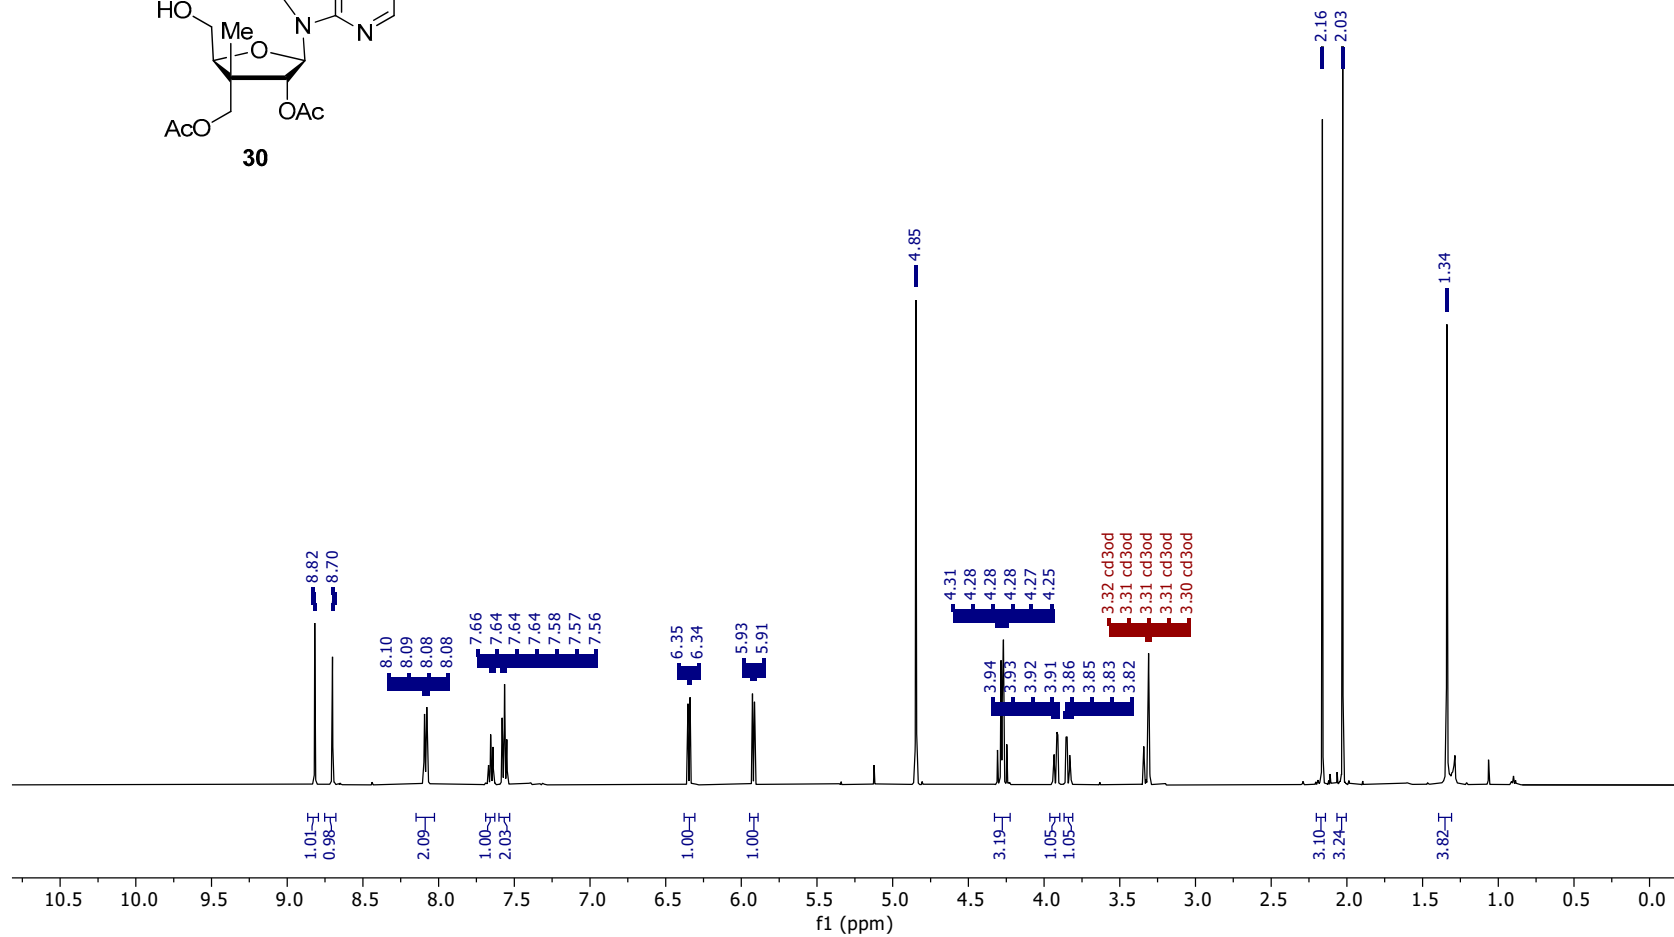

$^{13}\text{C}\{^1\text{H}\}$ -NMR (126 MHz,  $\text{CD}_3\text{OD}$ )

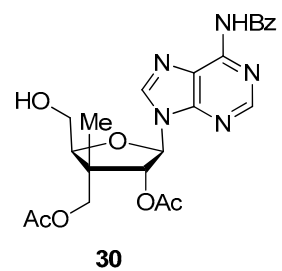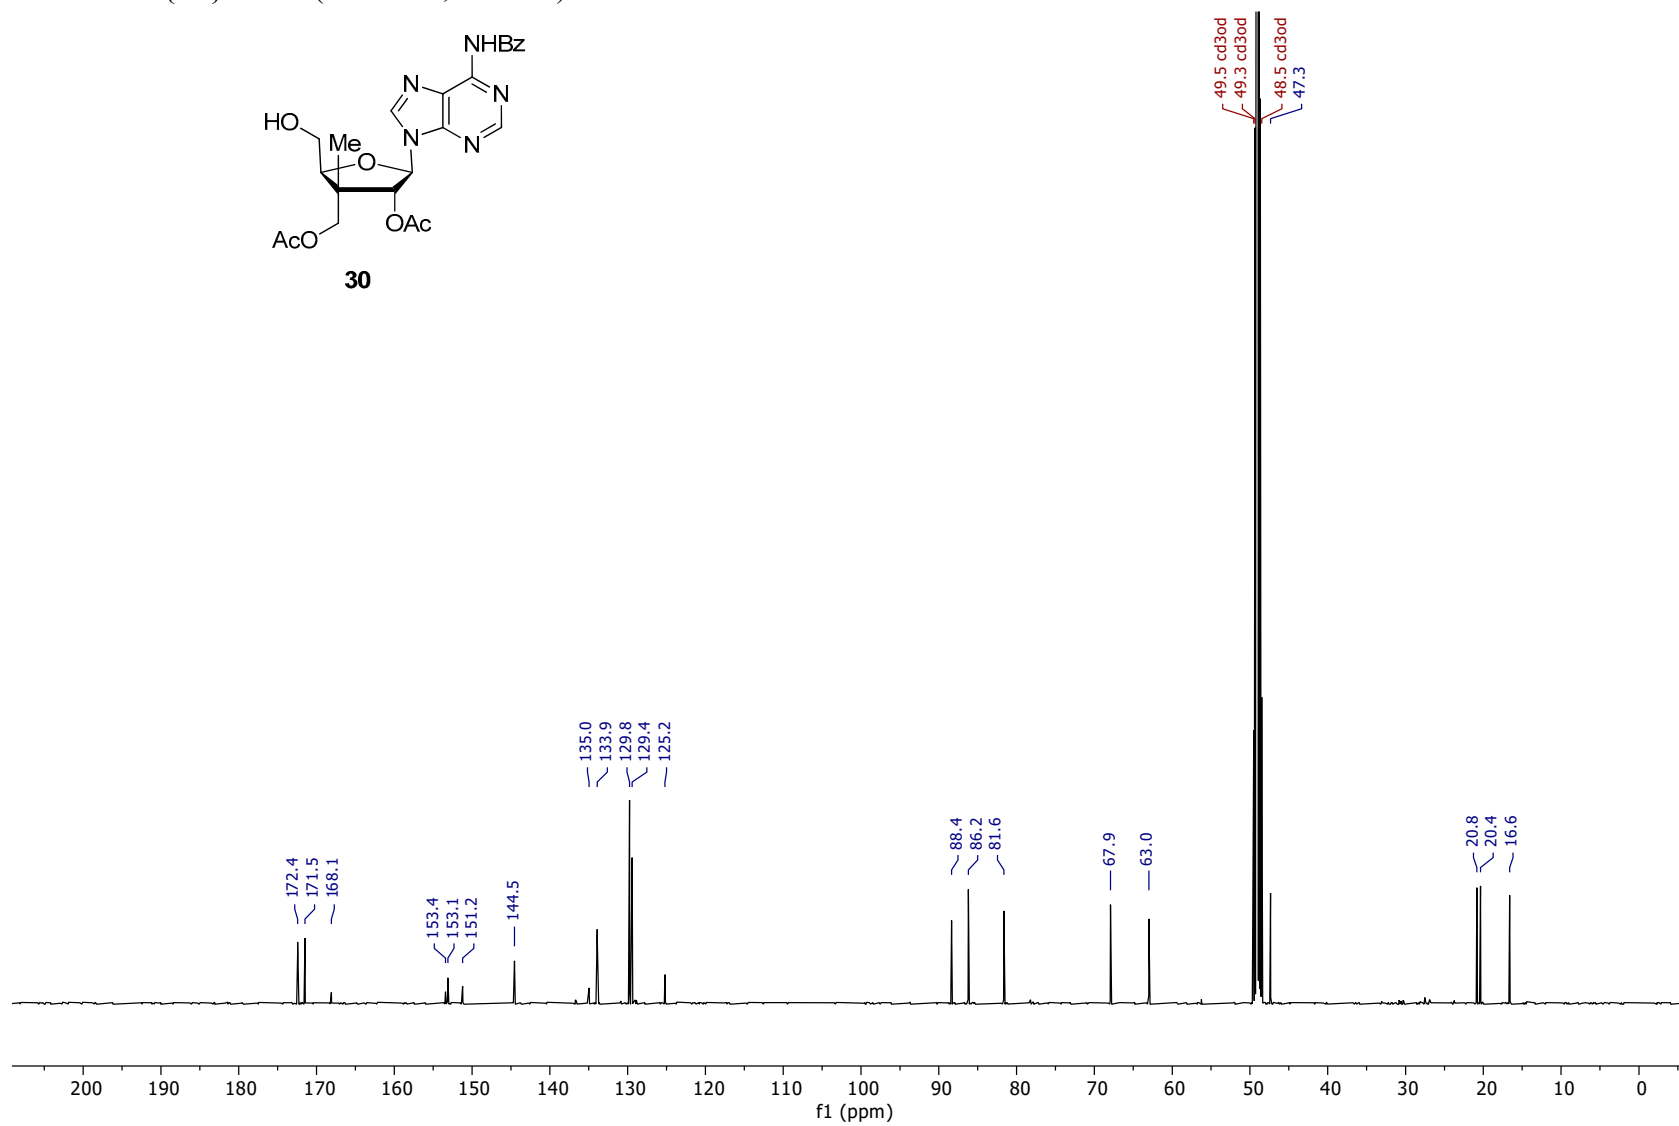

NOESY (500 MHz, CD<sub>3</sub>OD)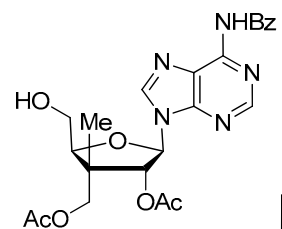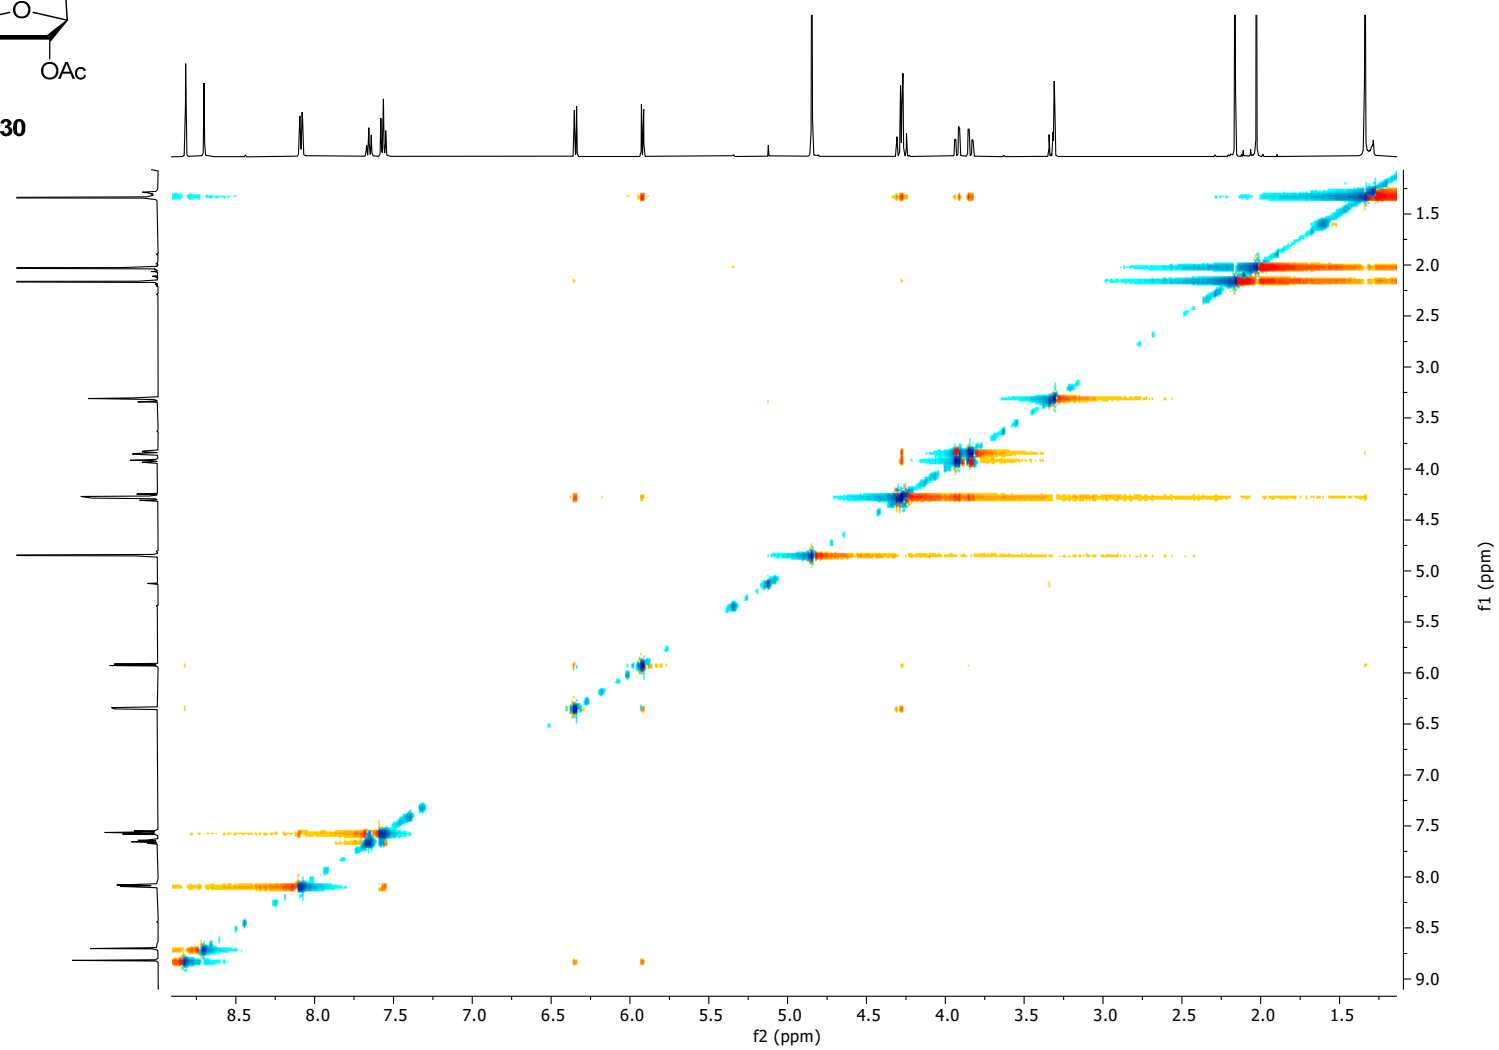

HMBC (500 MHz, CD<sub>3</sub>OD)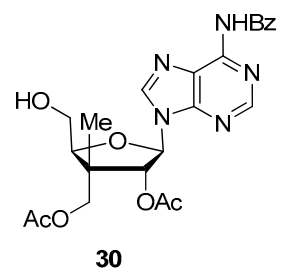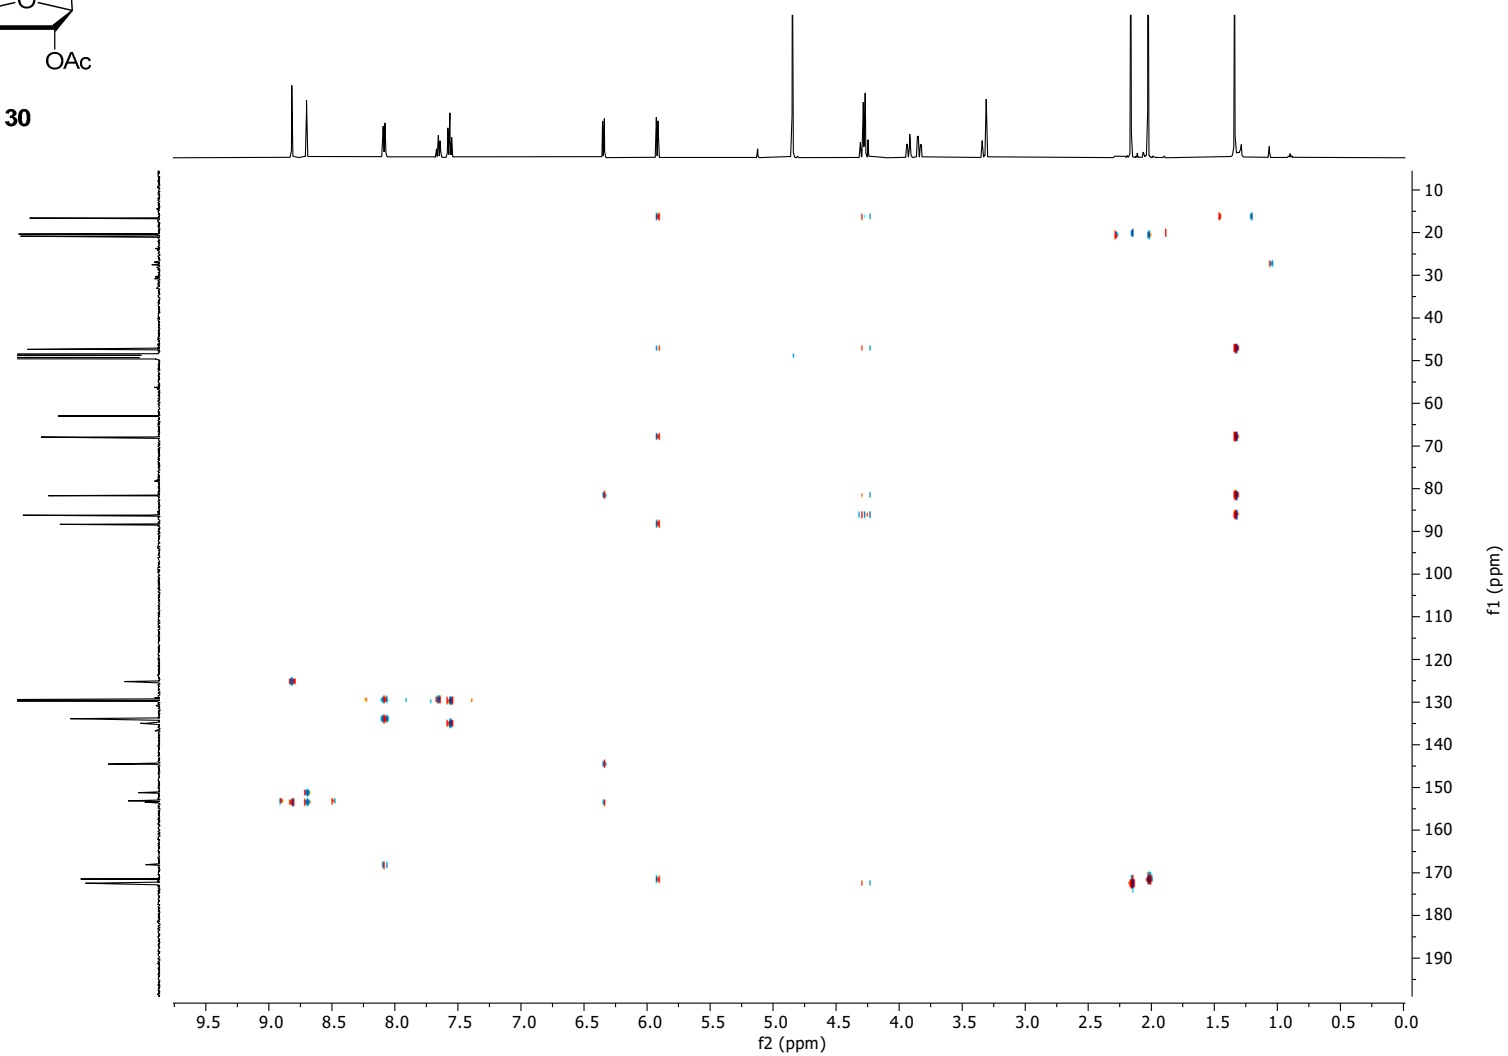

HSQC (500 MHz, CD<sub>3</sub>OD)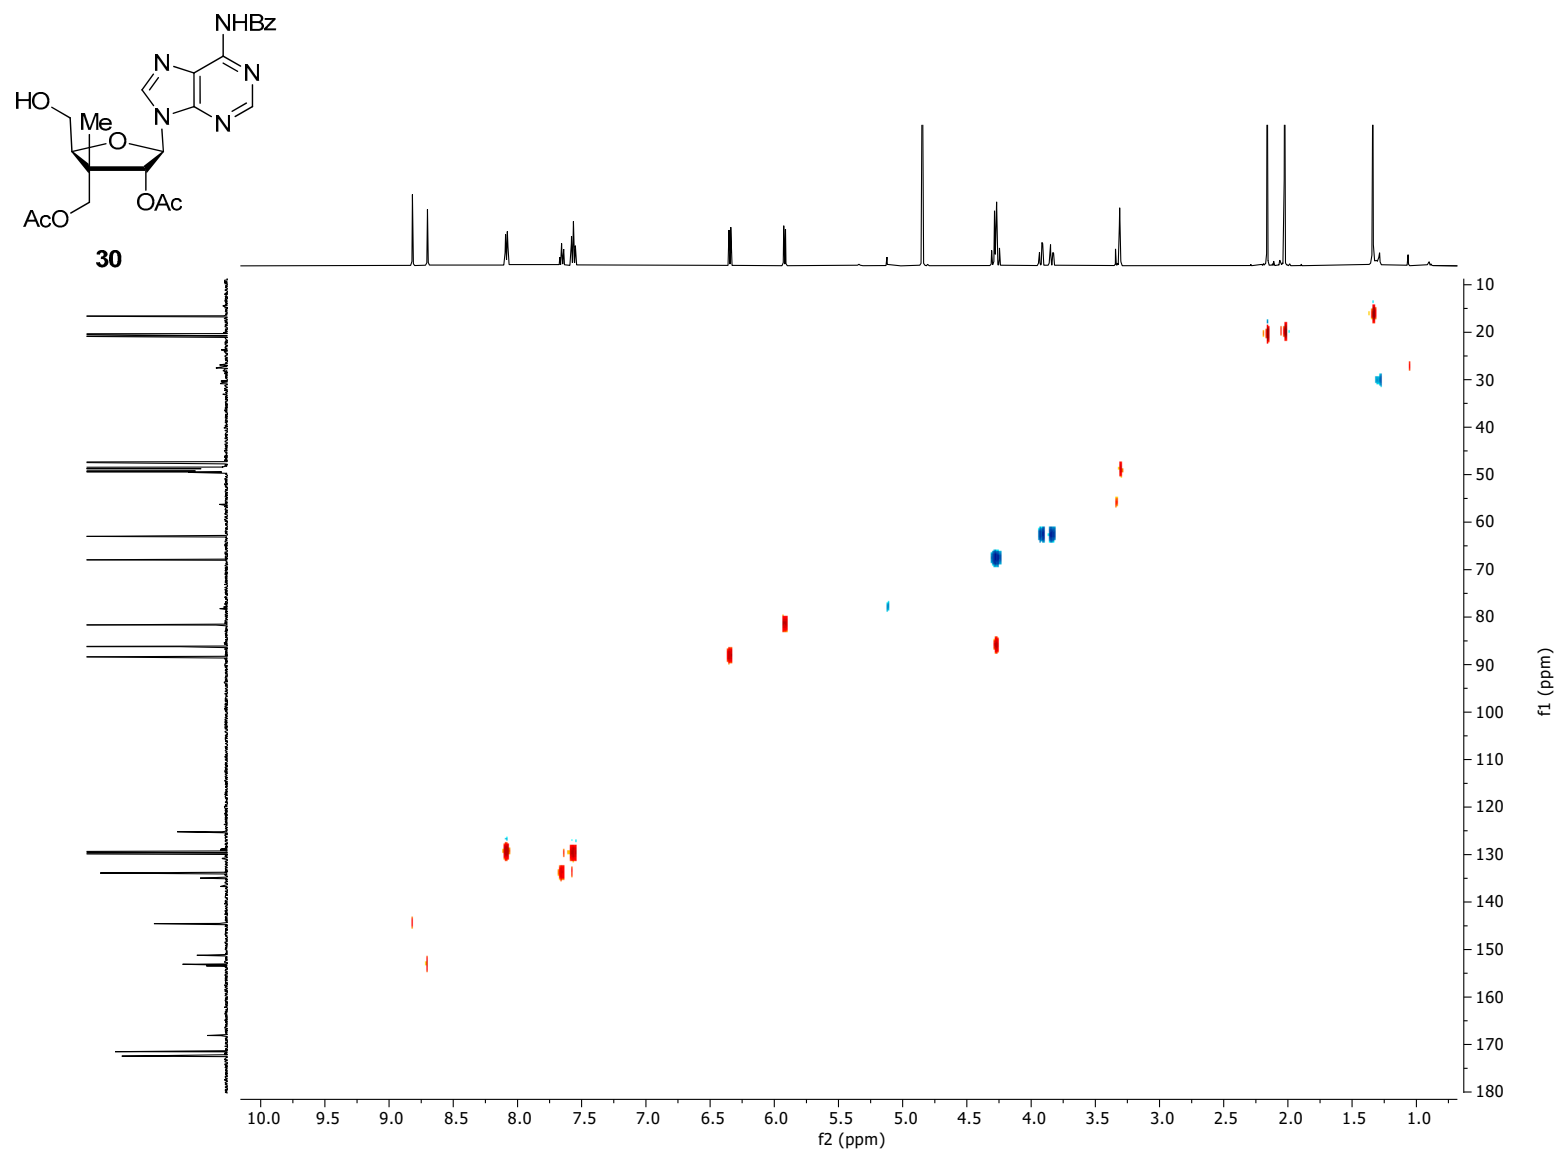

<sup>1</sup>H-NMR (500 MHz, CD<sub>3</sub>OD)

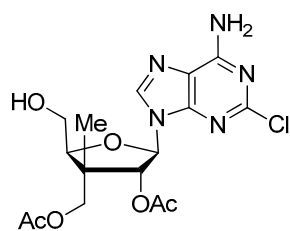

**31**

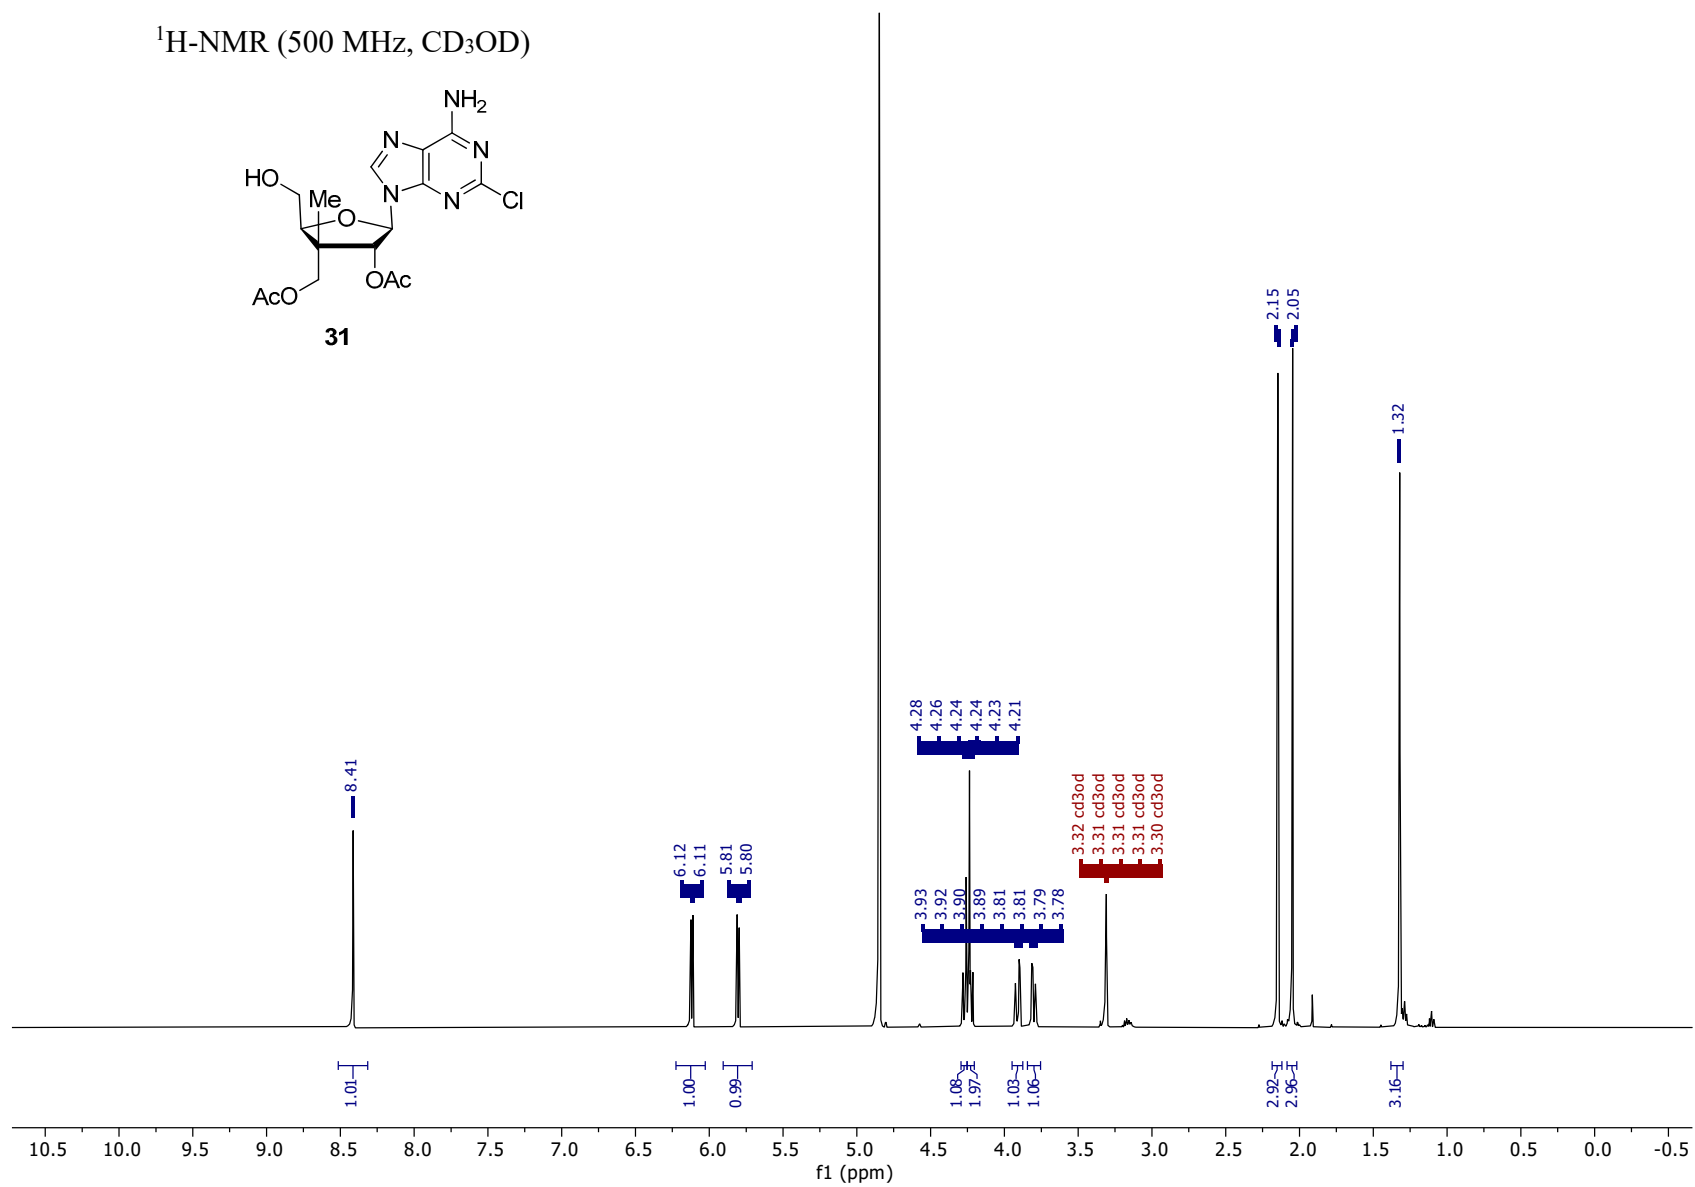

$^{13}\text{C}\{^1\text{H}\}$ -NMR (126 MHz,  $\text{CD}_3\text{OD}$ )

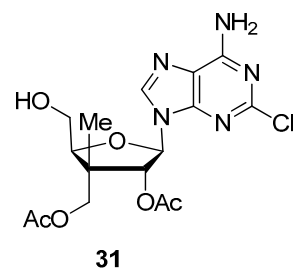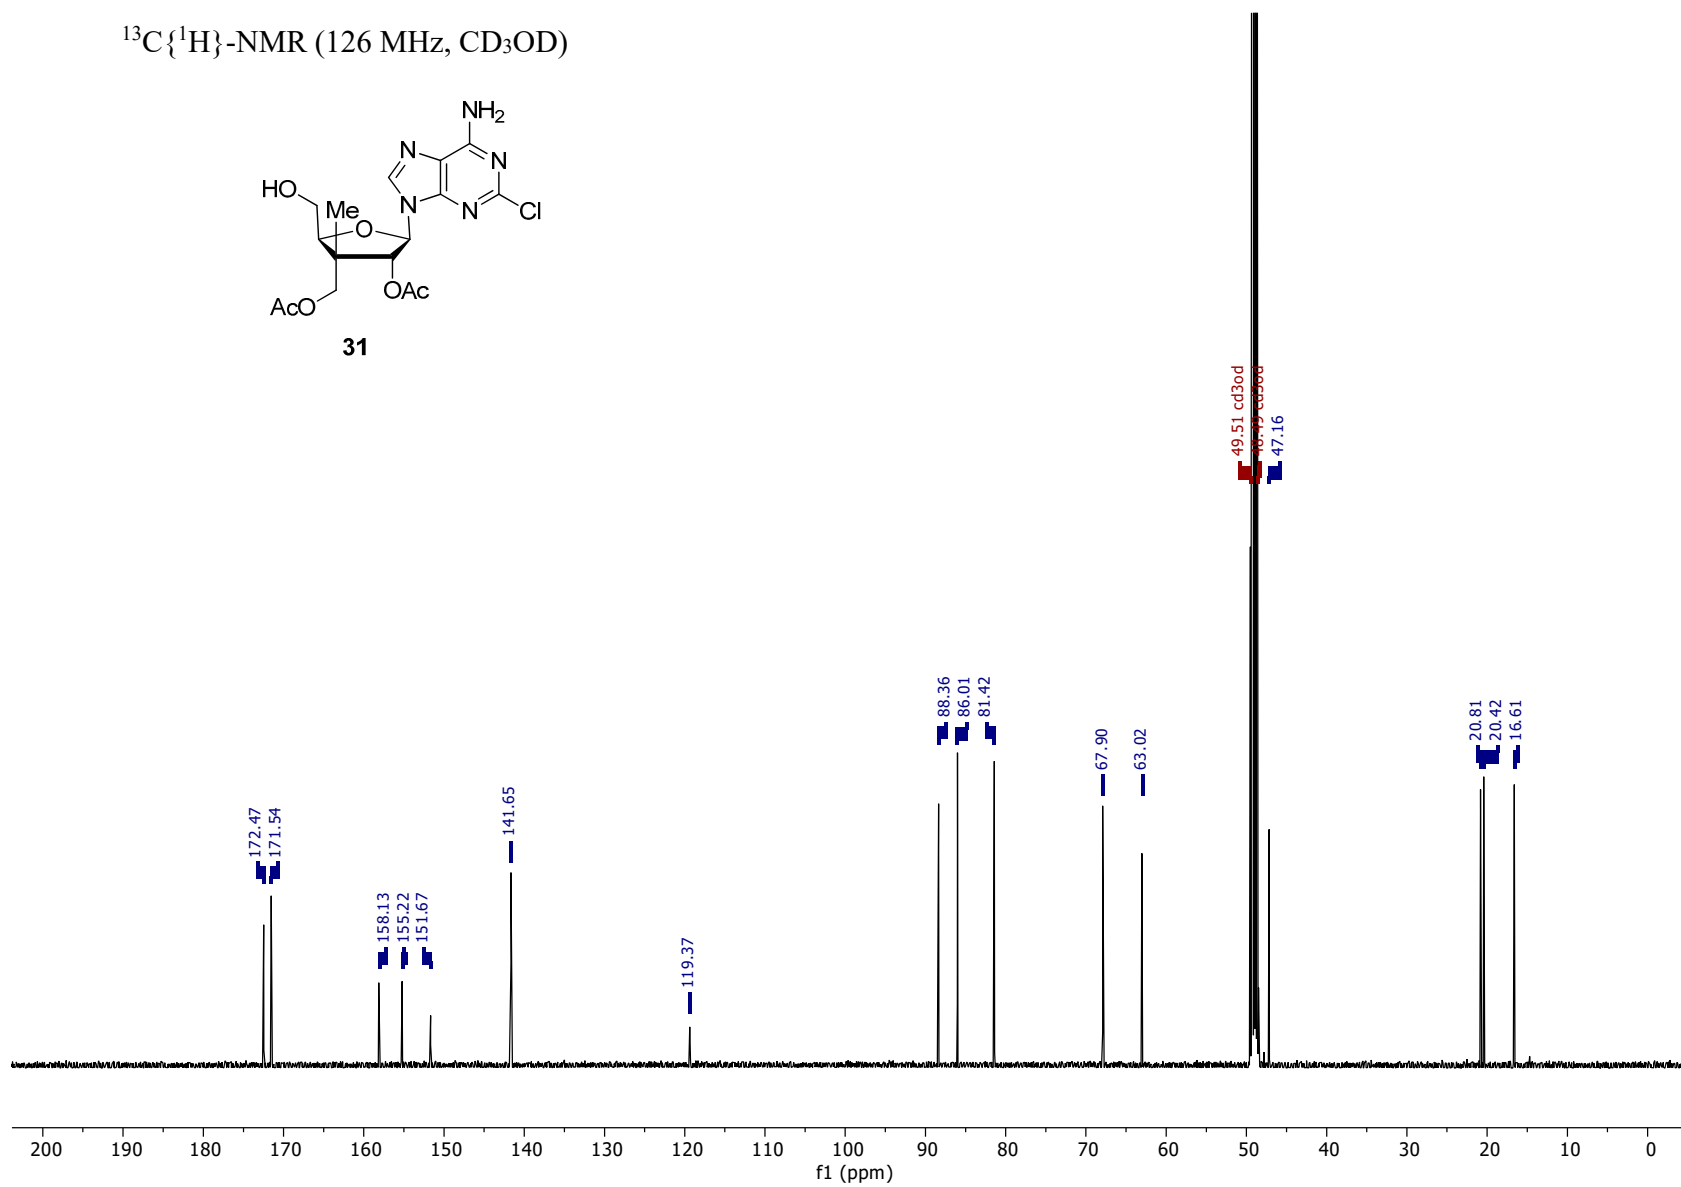



NOESY (500 MHz, CD<sub>3</sub>OD)

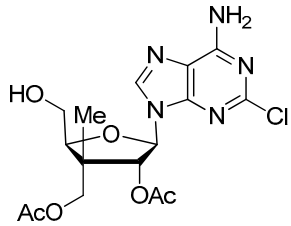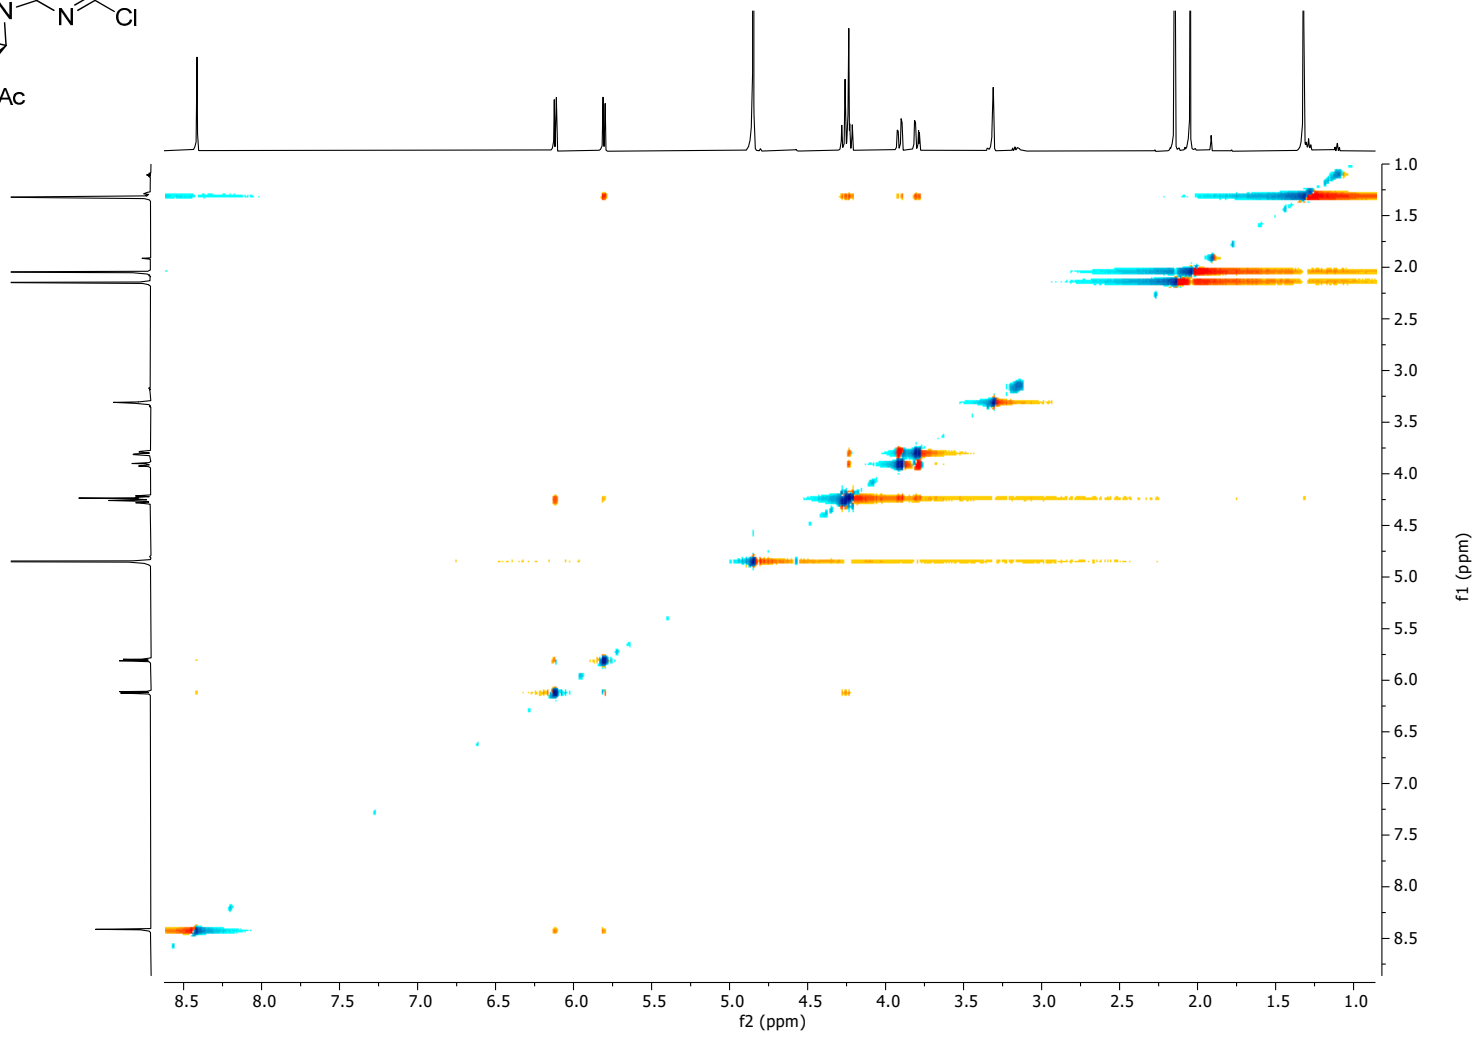

HMBC (500 MHz, CD<sub>3</sub>OD)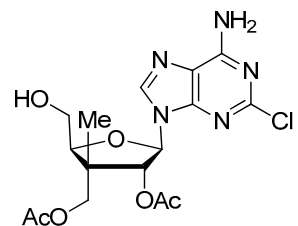

31

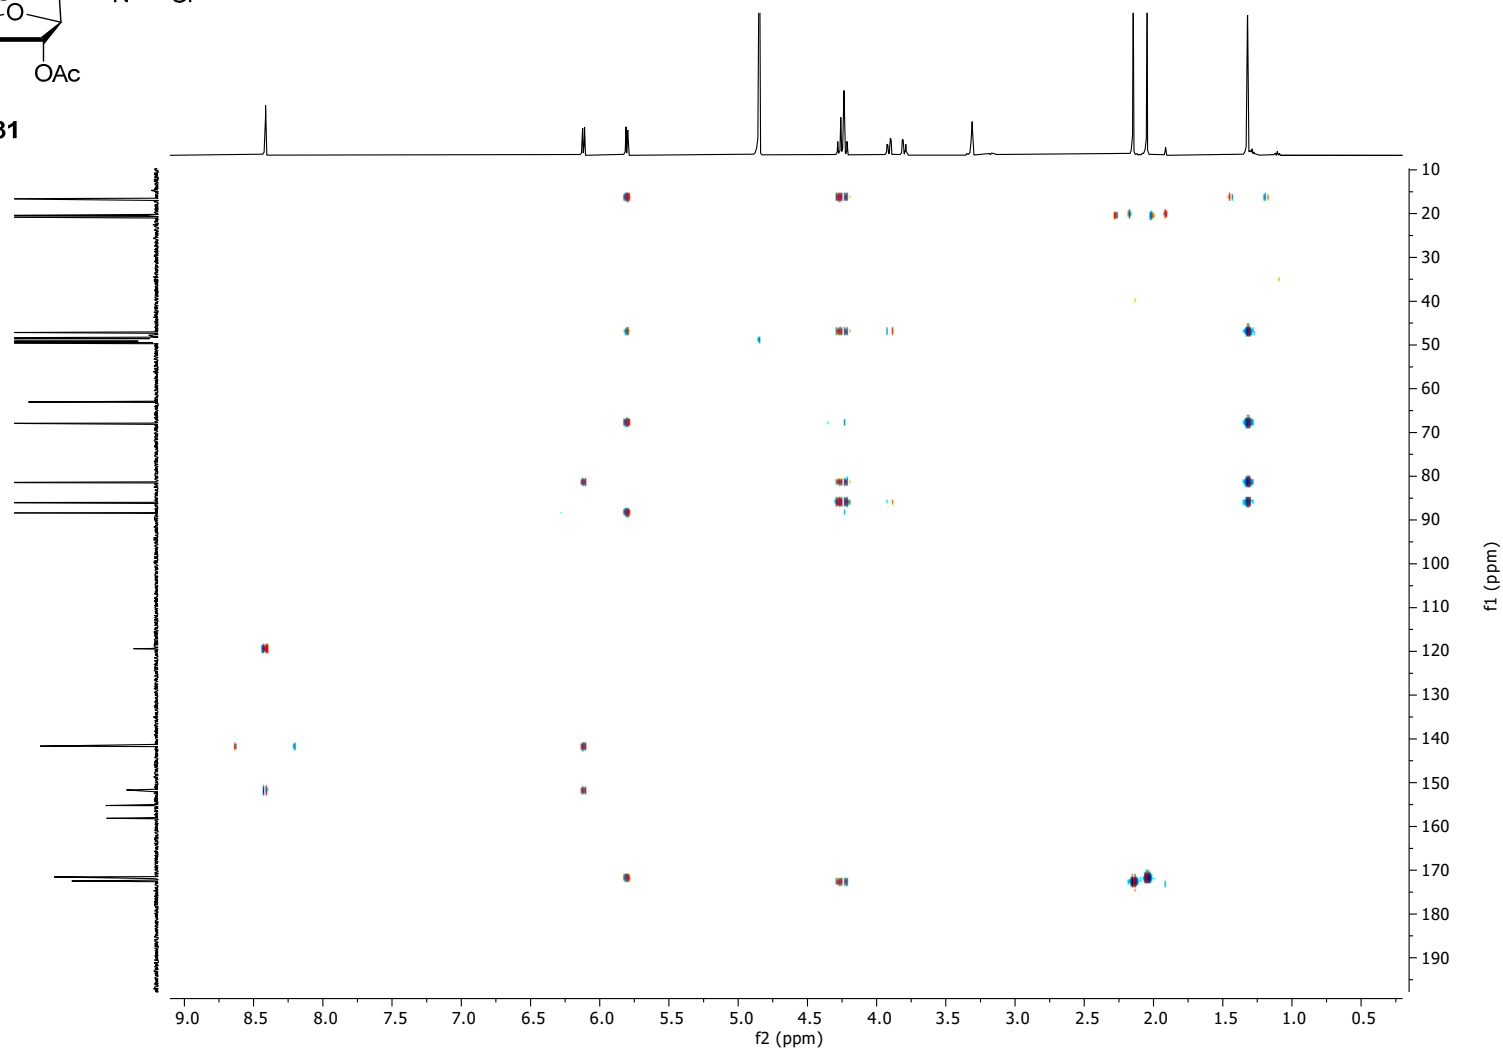

HSQC (500 MHz, CD<sub>3</sub>OD)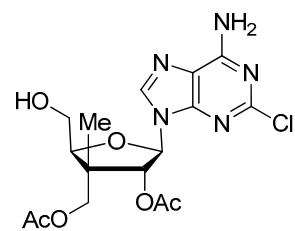**31**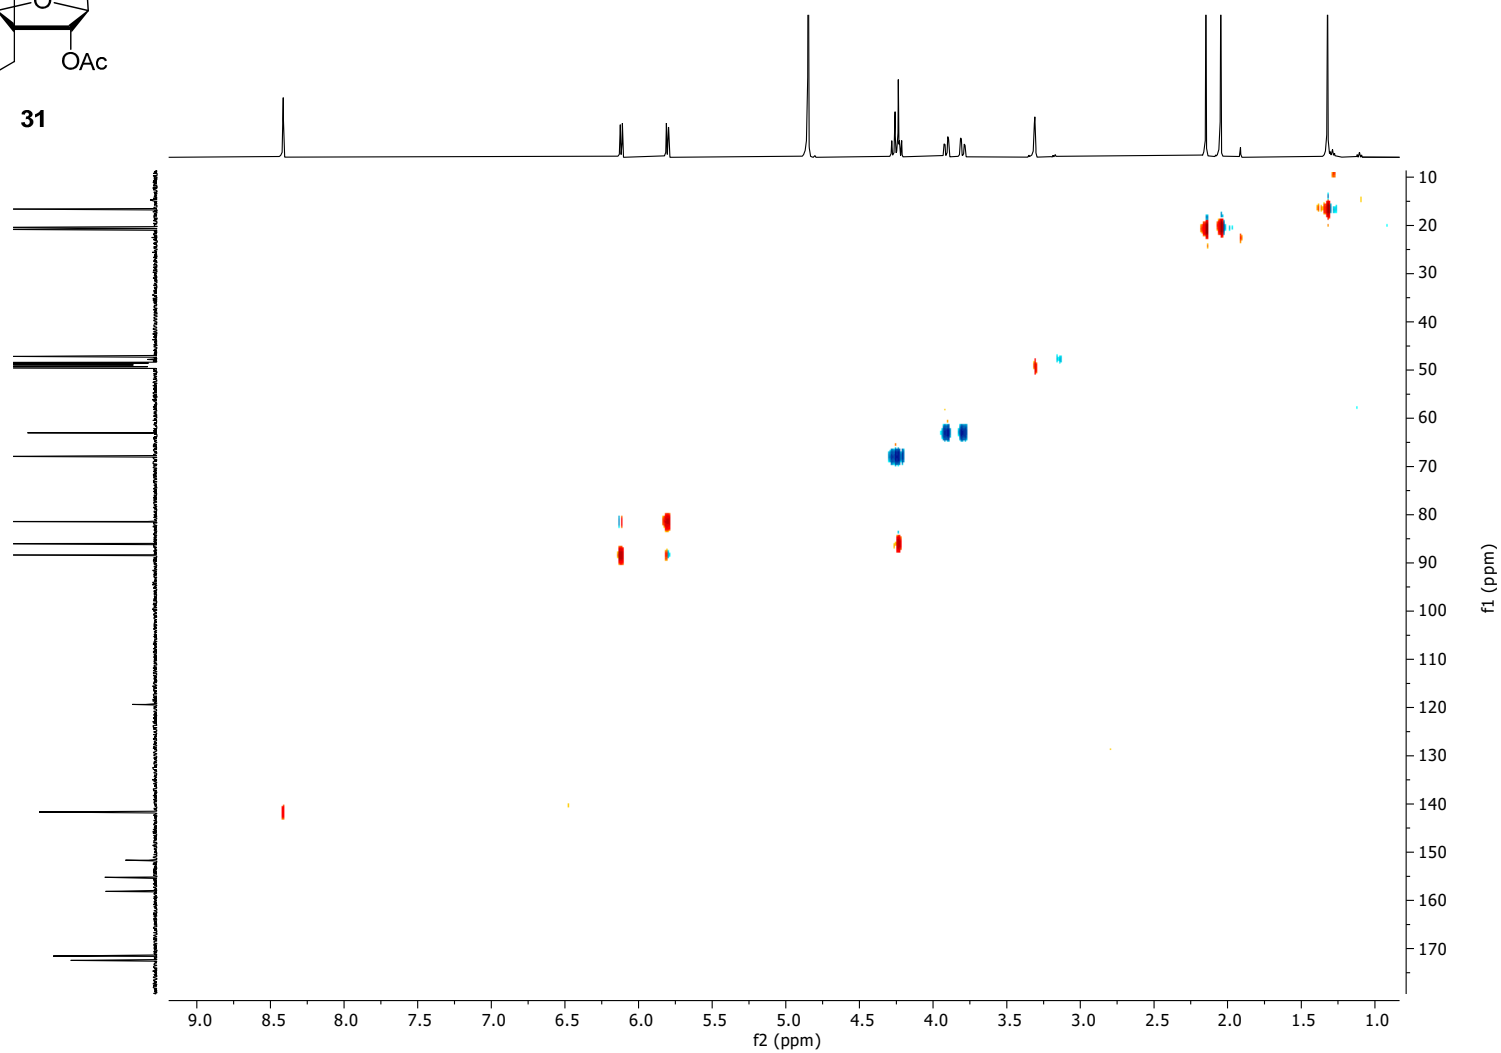

$^1\text{H}$ -NMR (500 MHz,  $\text{CD}_3\text{OD}$ )

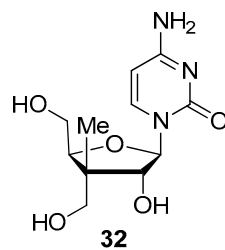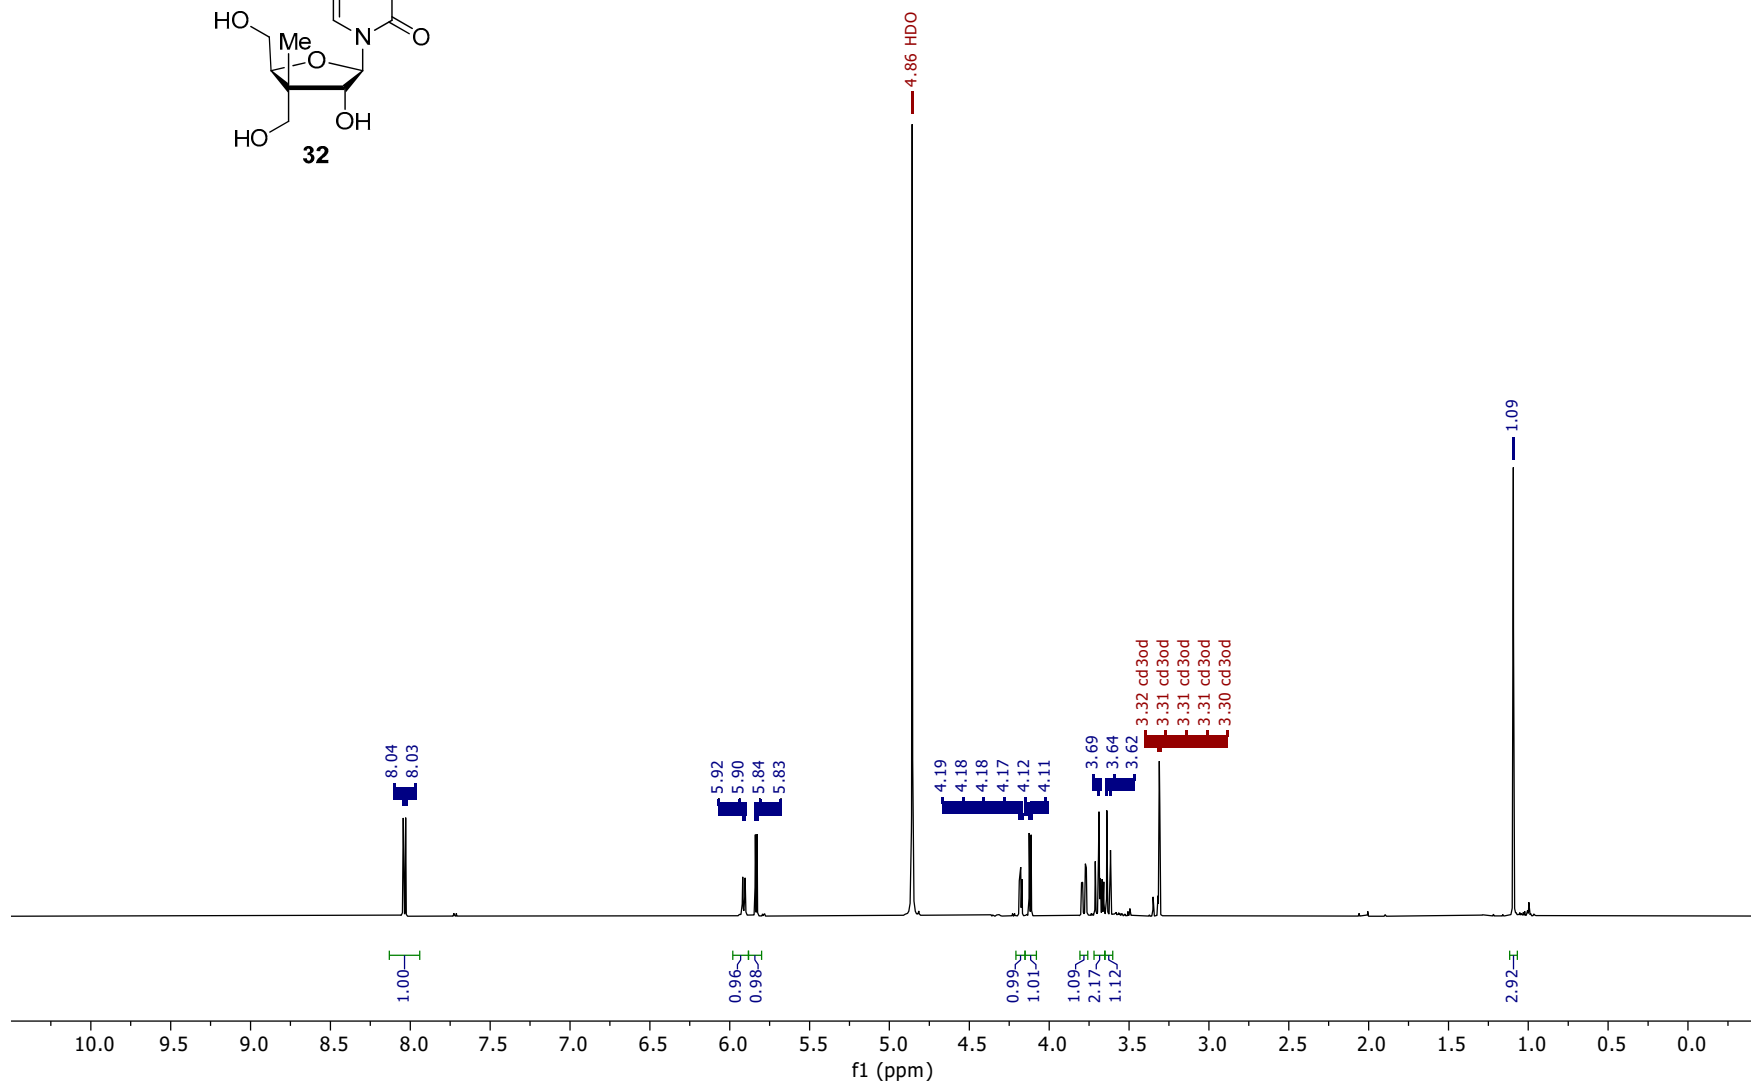

$^{13}\text{C}\{^1\text{H}\}$ -NMR (126 MHz,  $\text{CD}_3\text{OD}$ )

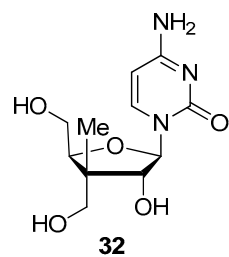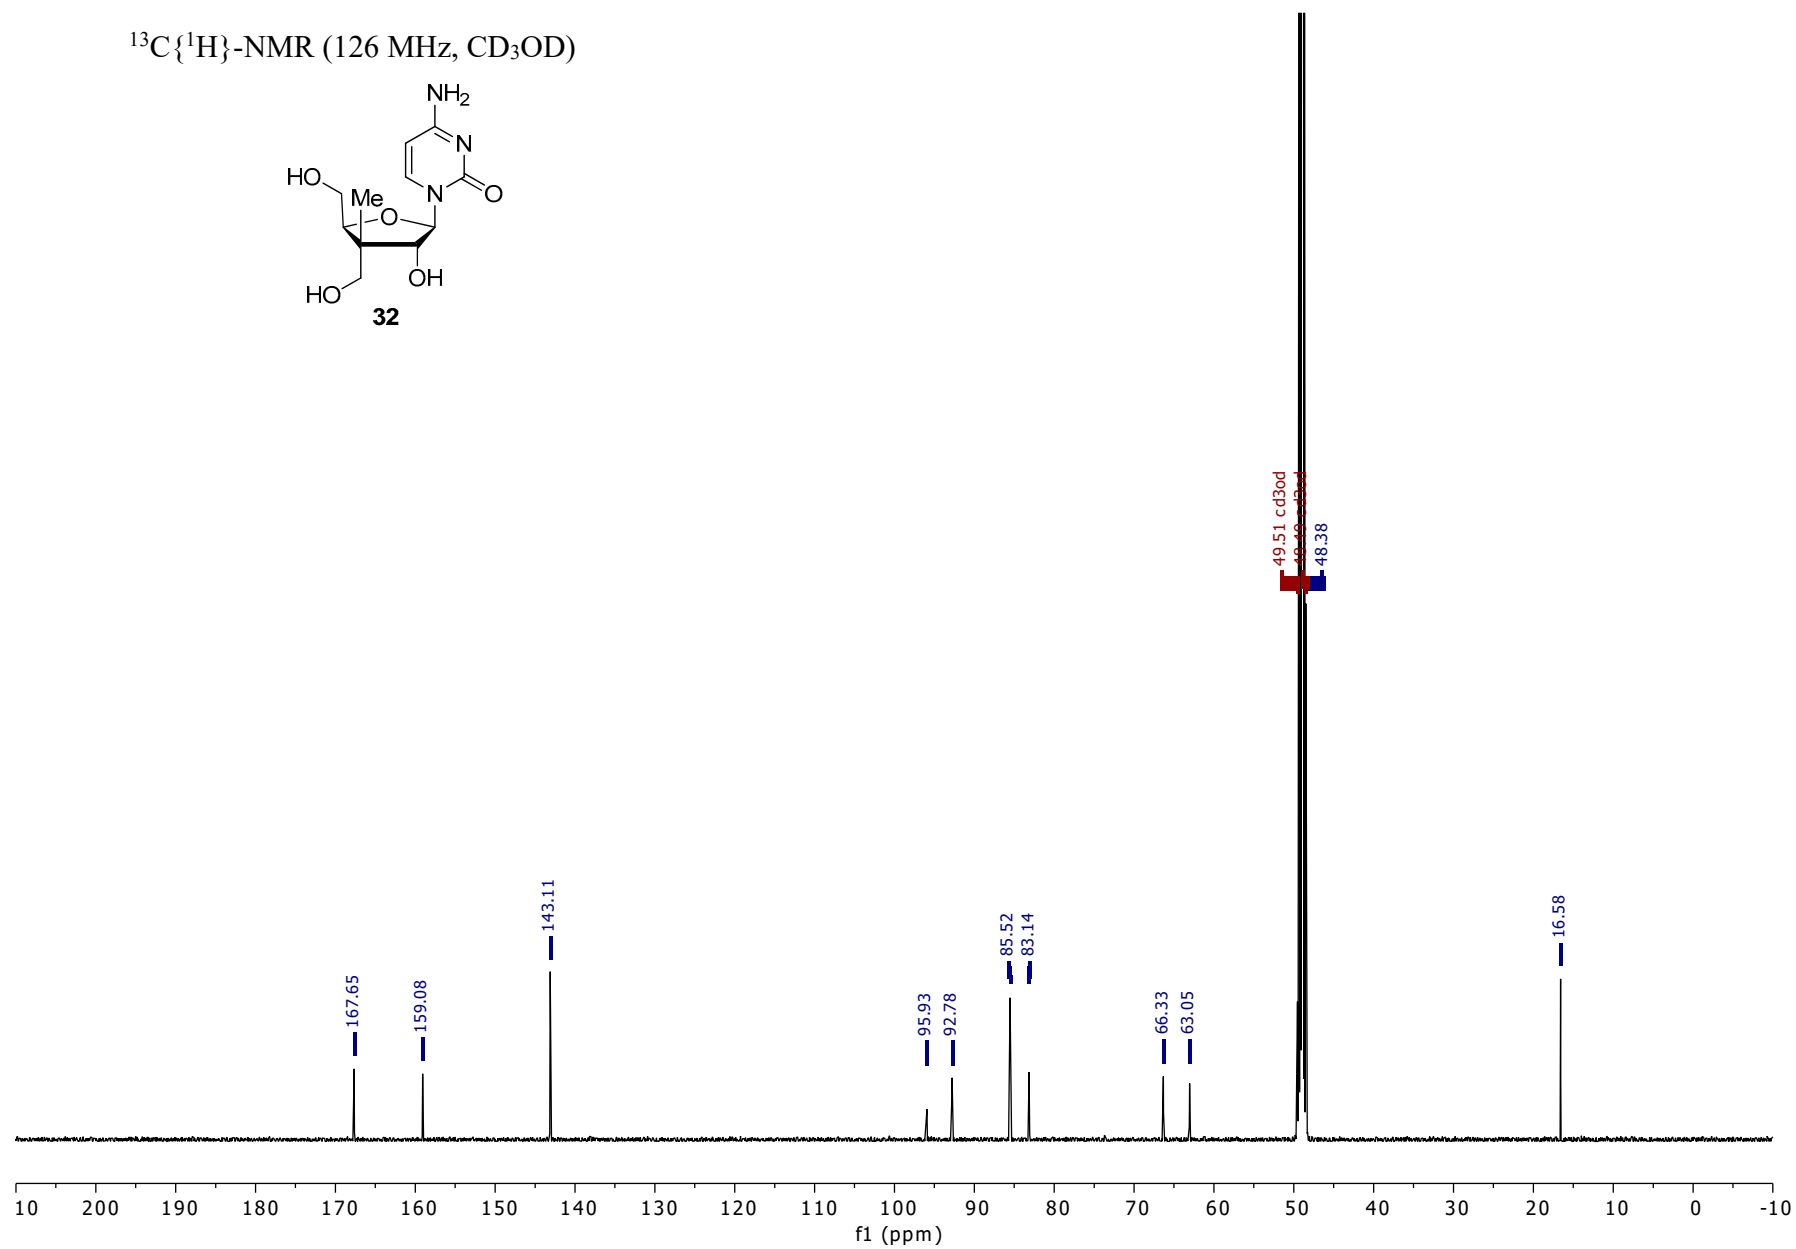

<sup>1</sup>H-NMR (500 MHz, CD<sub>3</sub>OD)

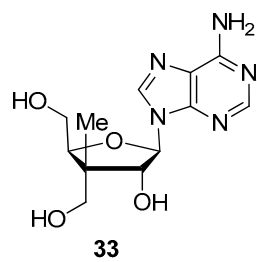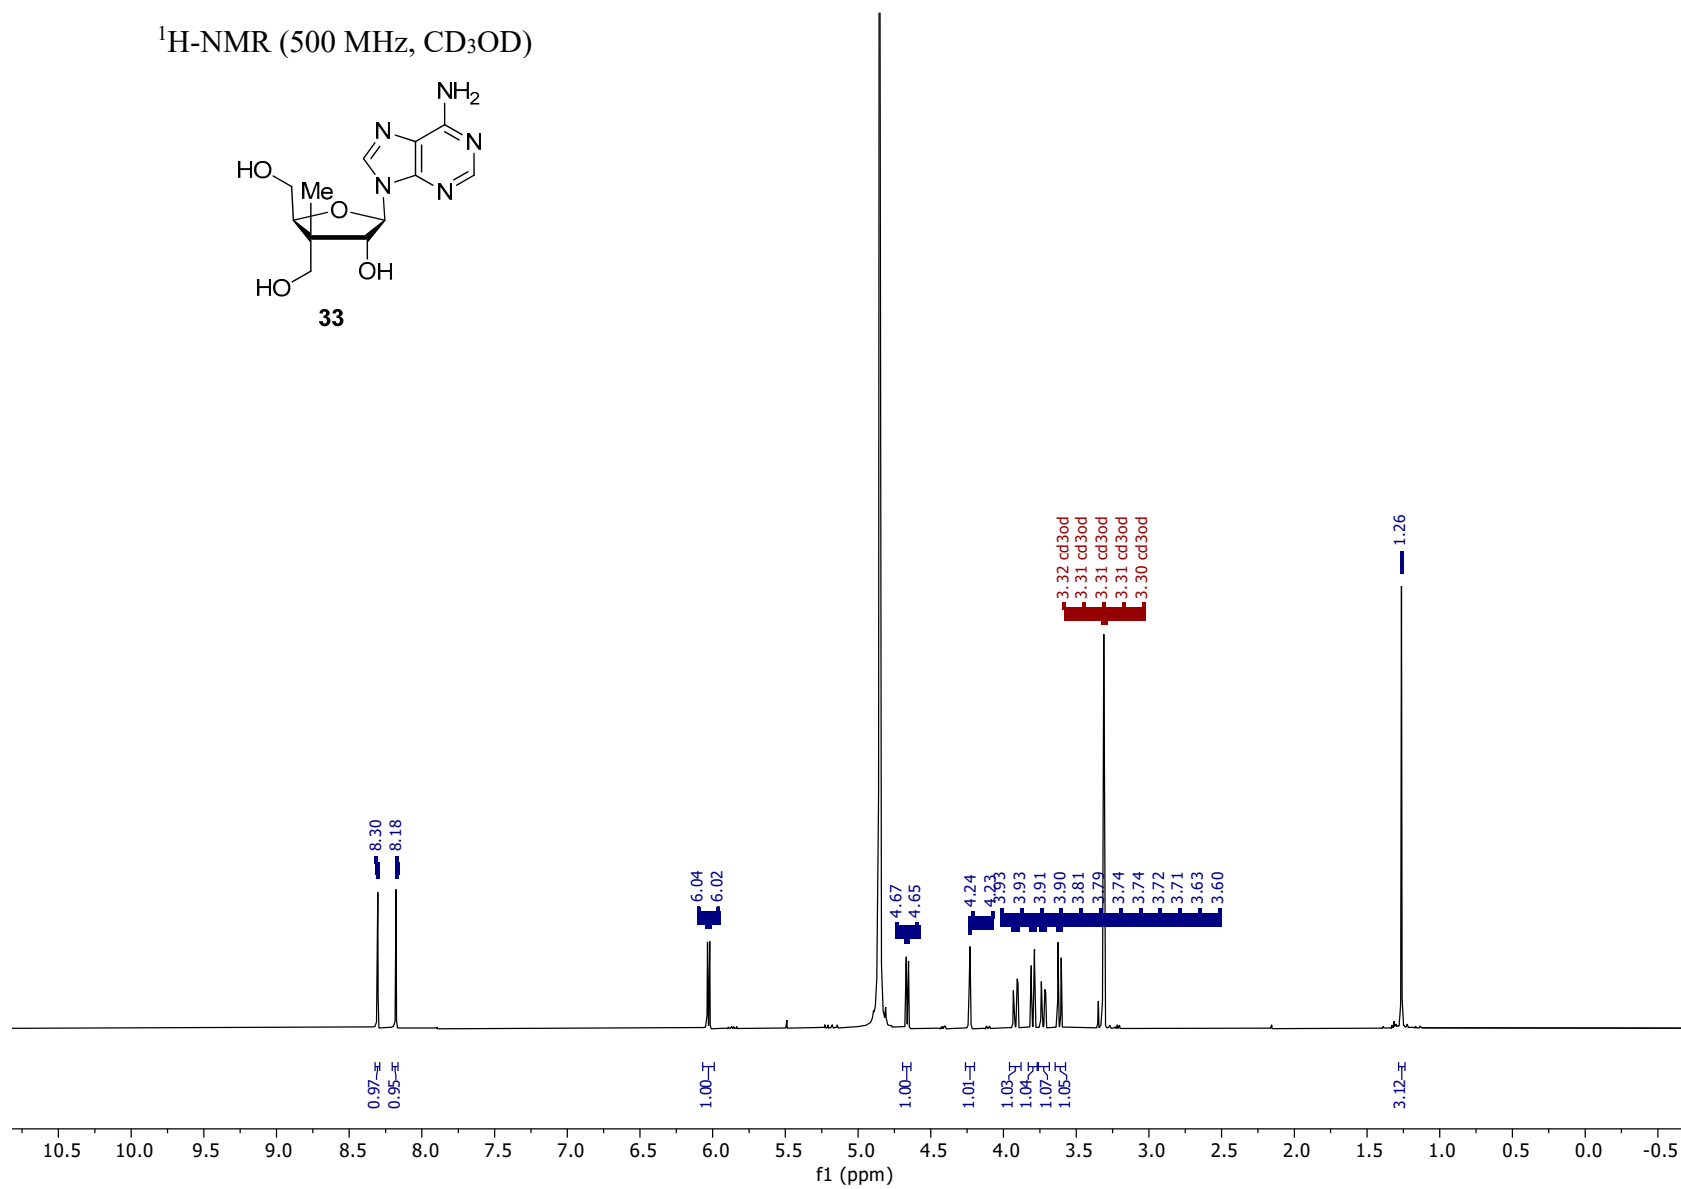

$^{13}\text{C}\{^1\text{H}\}$ -NMR (126 MHz,  $\text{CD}_3\text{OD}$ )

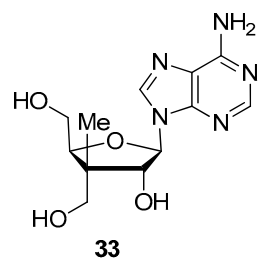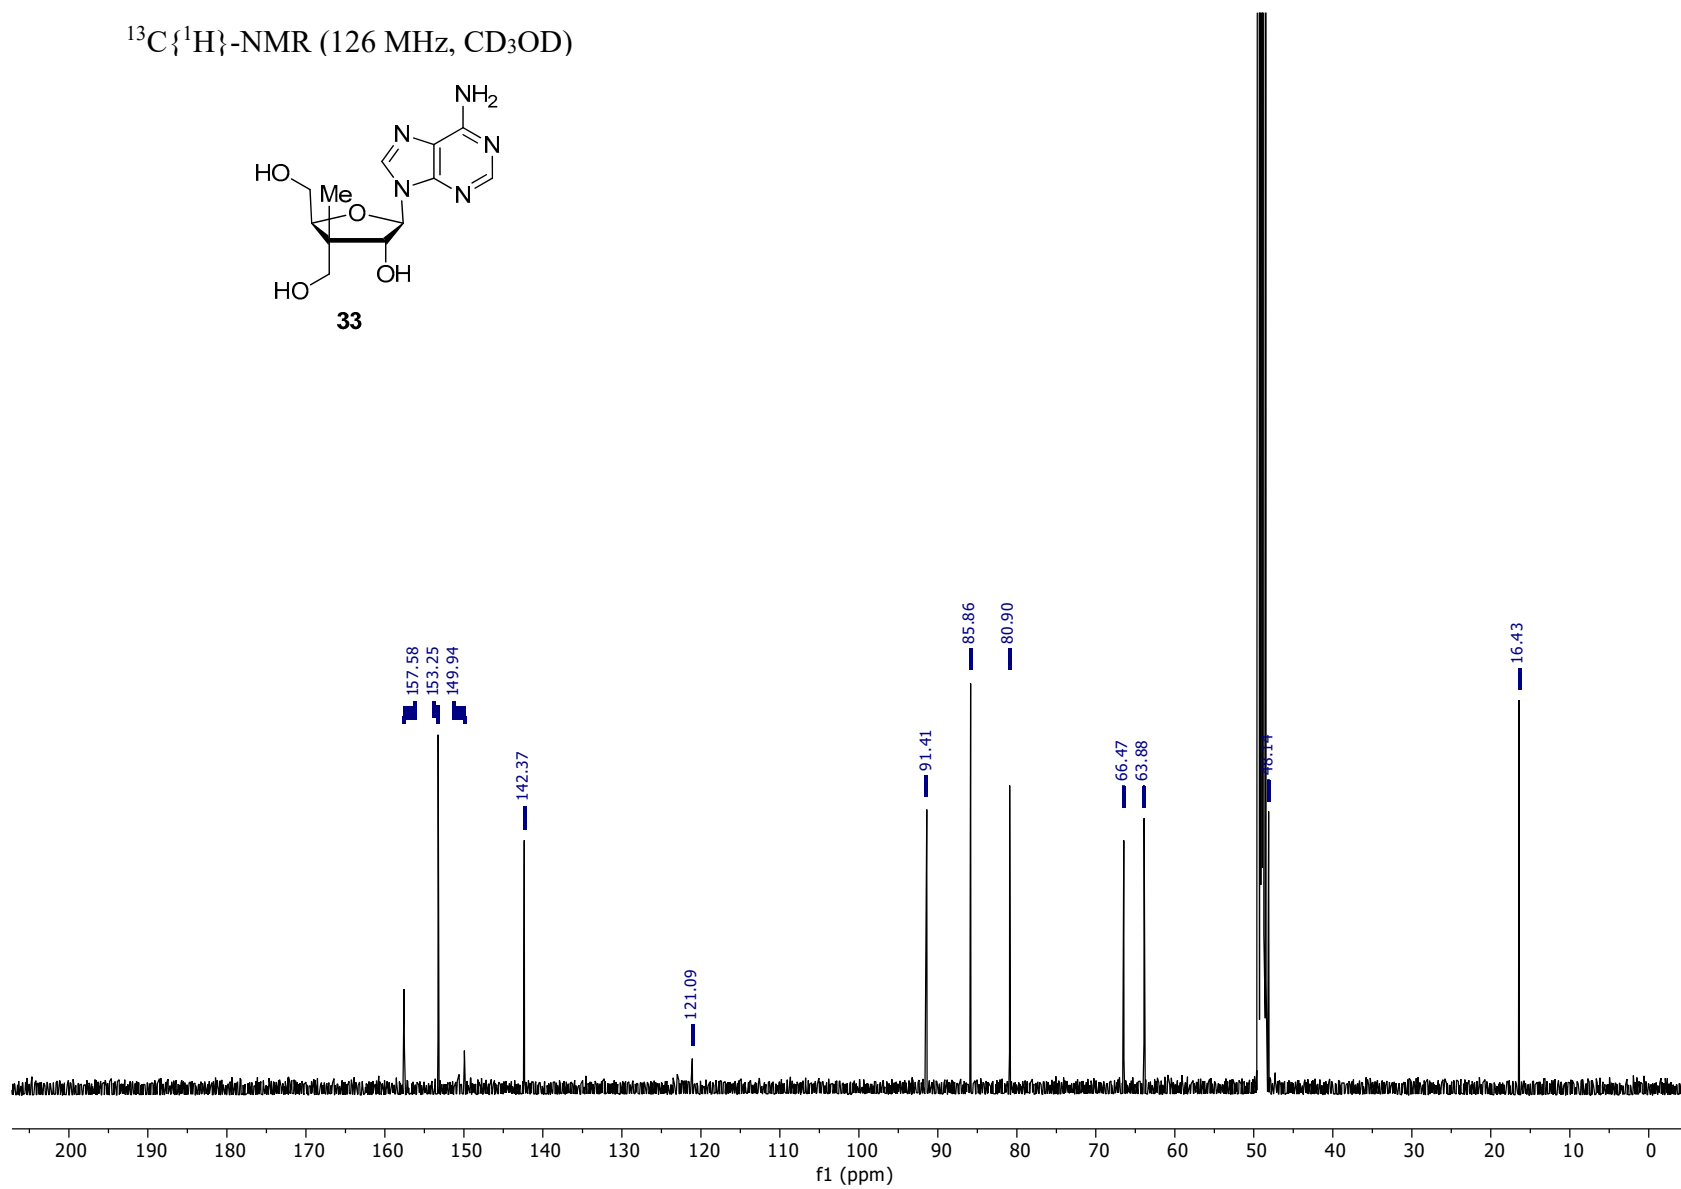

NOESY (500 MHz, CD<sub>3</sub>OD)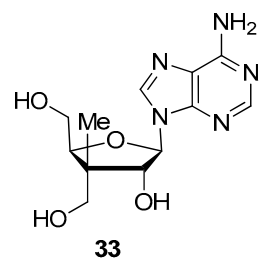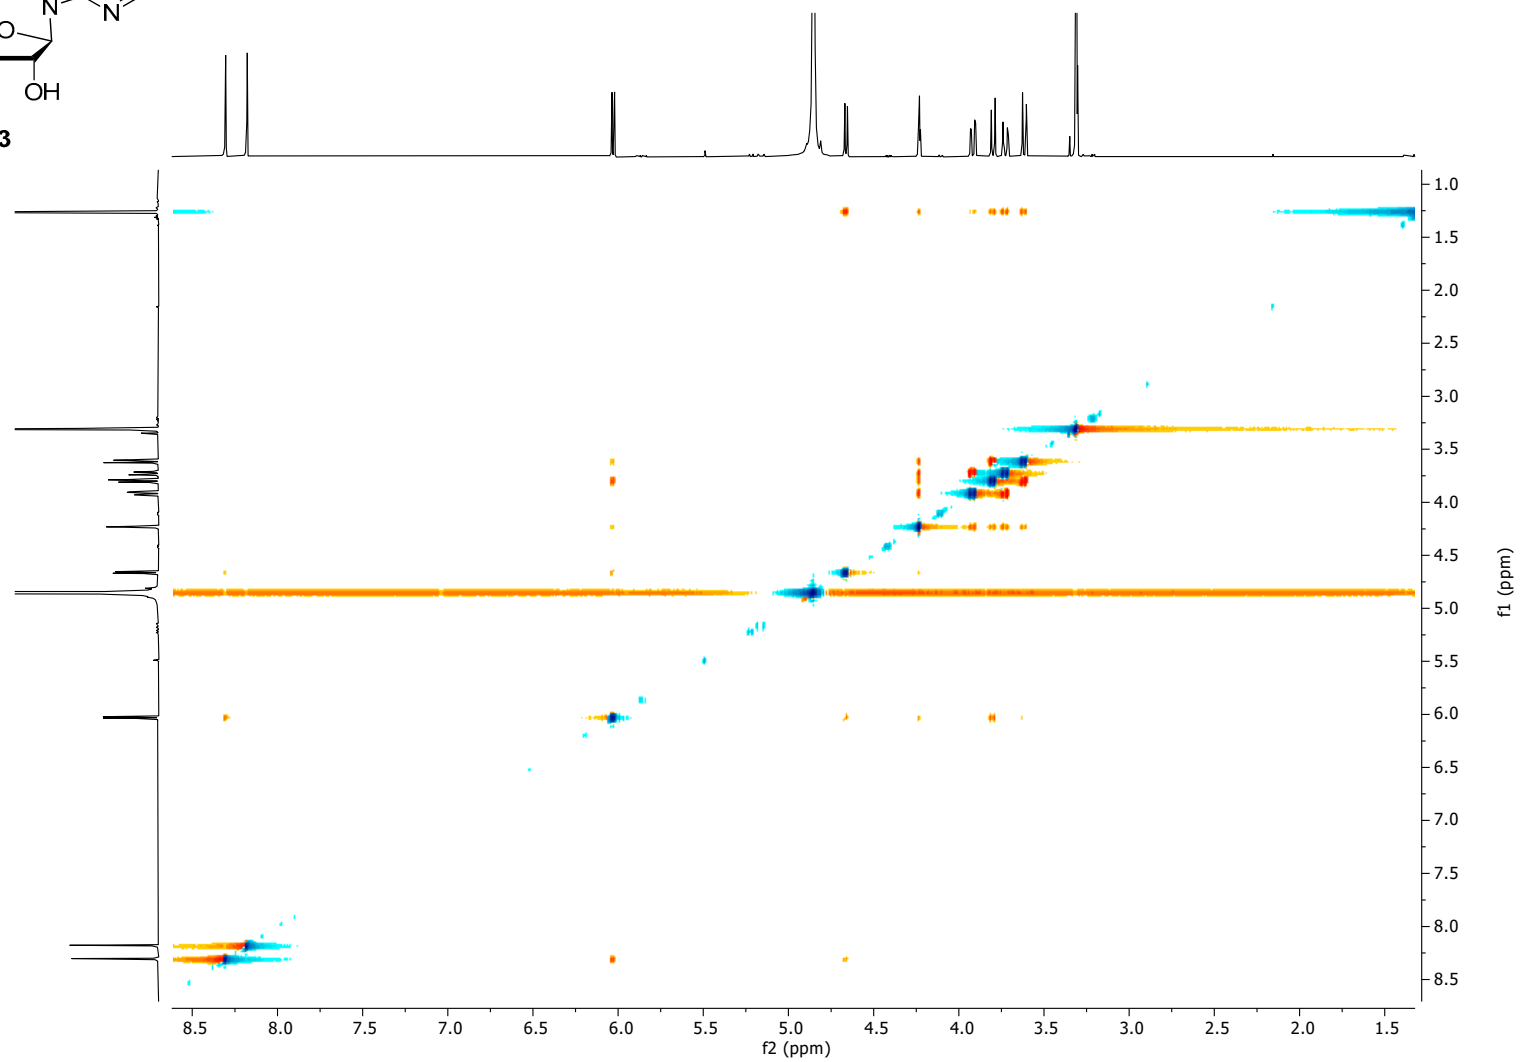



HMBC (500 MHz, CD<sub>3</sub>OD)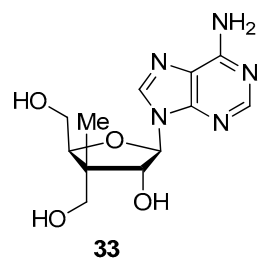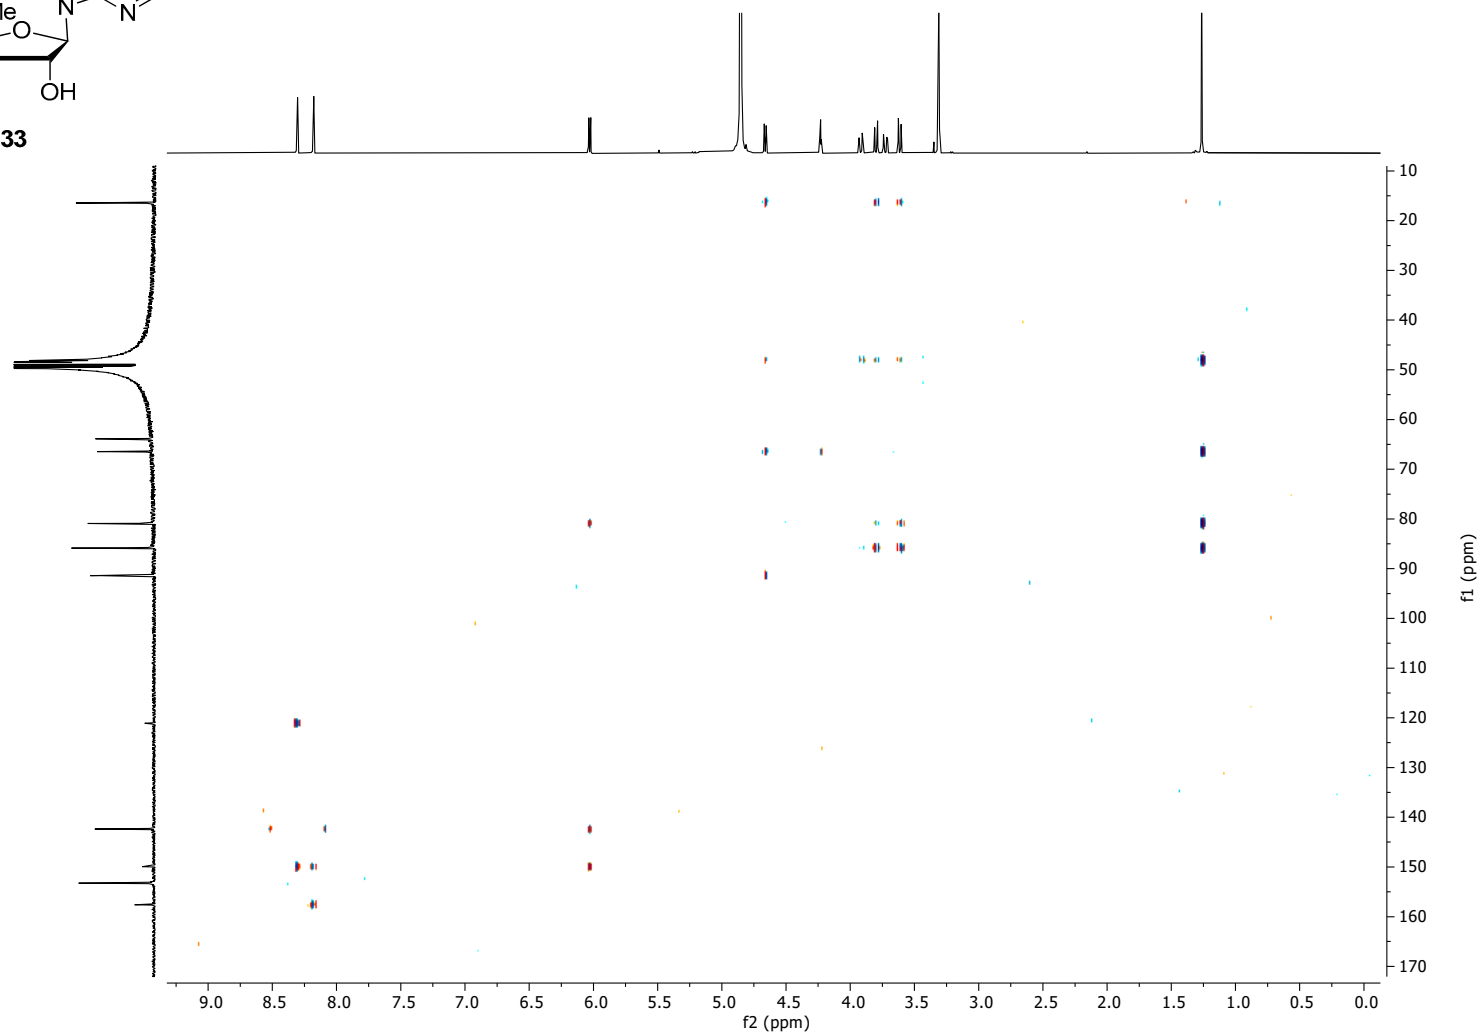

HSQC (500 MHz, CD<sub>3</sub>OD)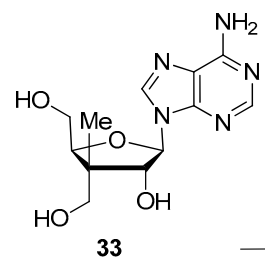**33**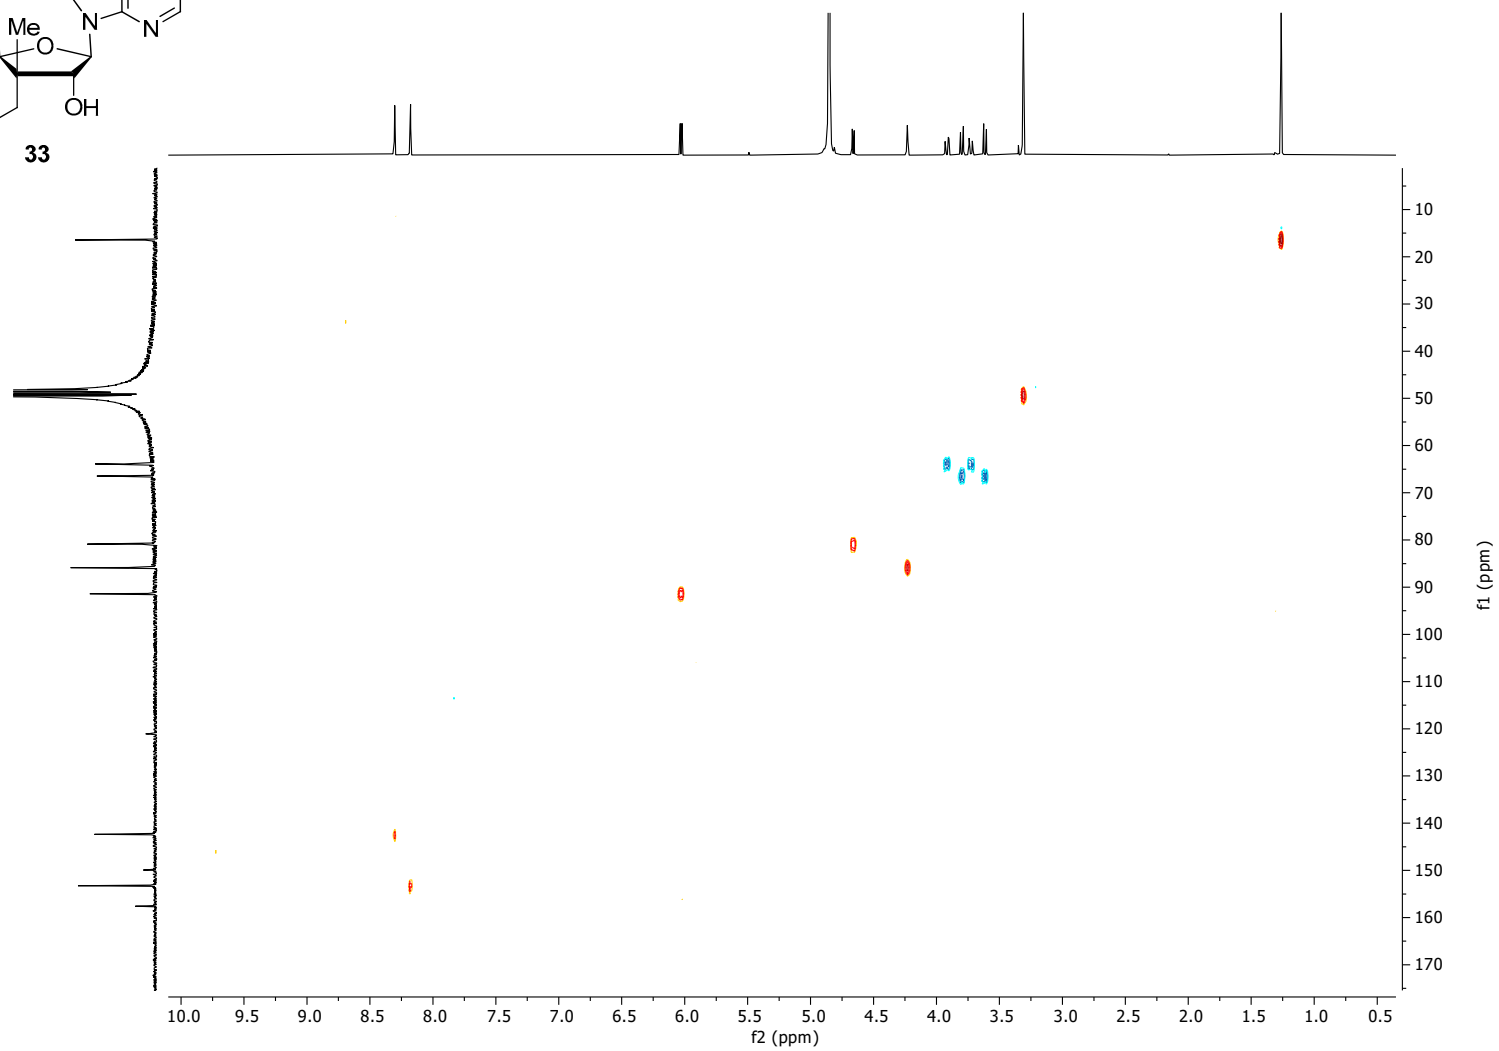

$^1\text{H}$ -NMR (500 MHz,  $\text{CD}_3\text{OD}$ )

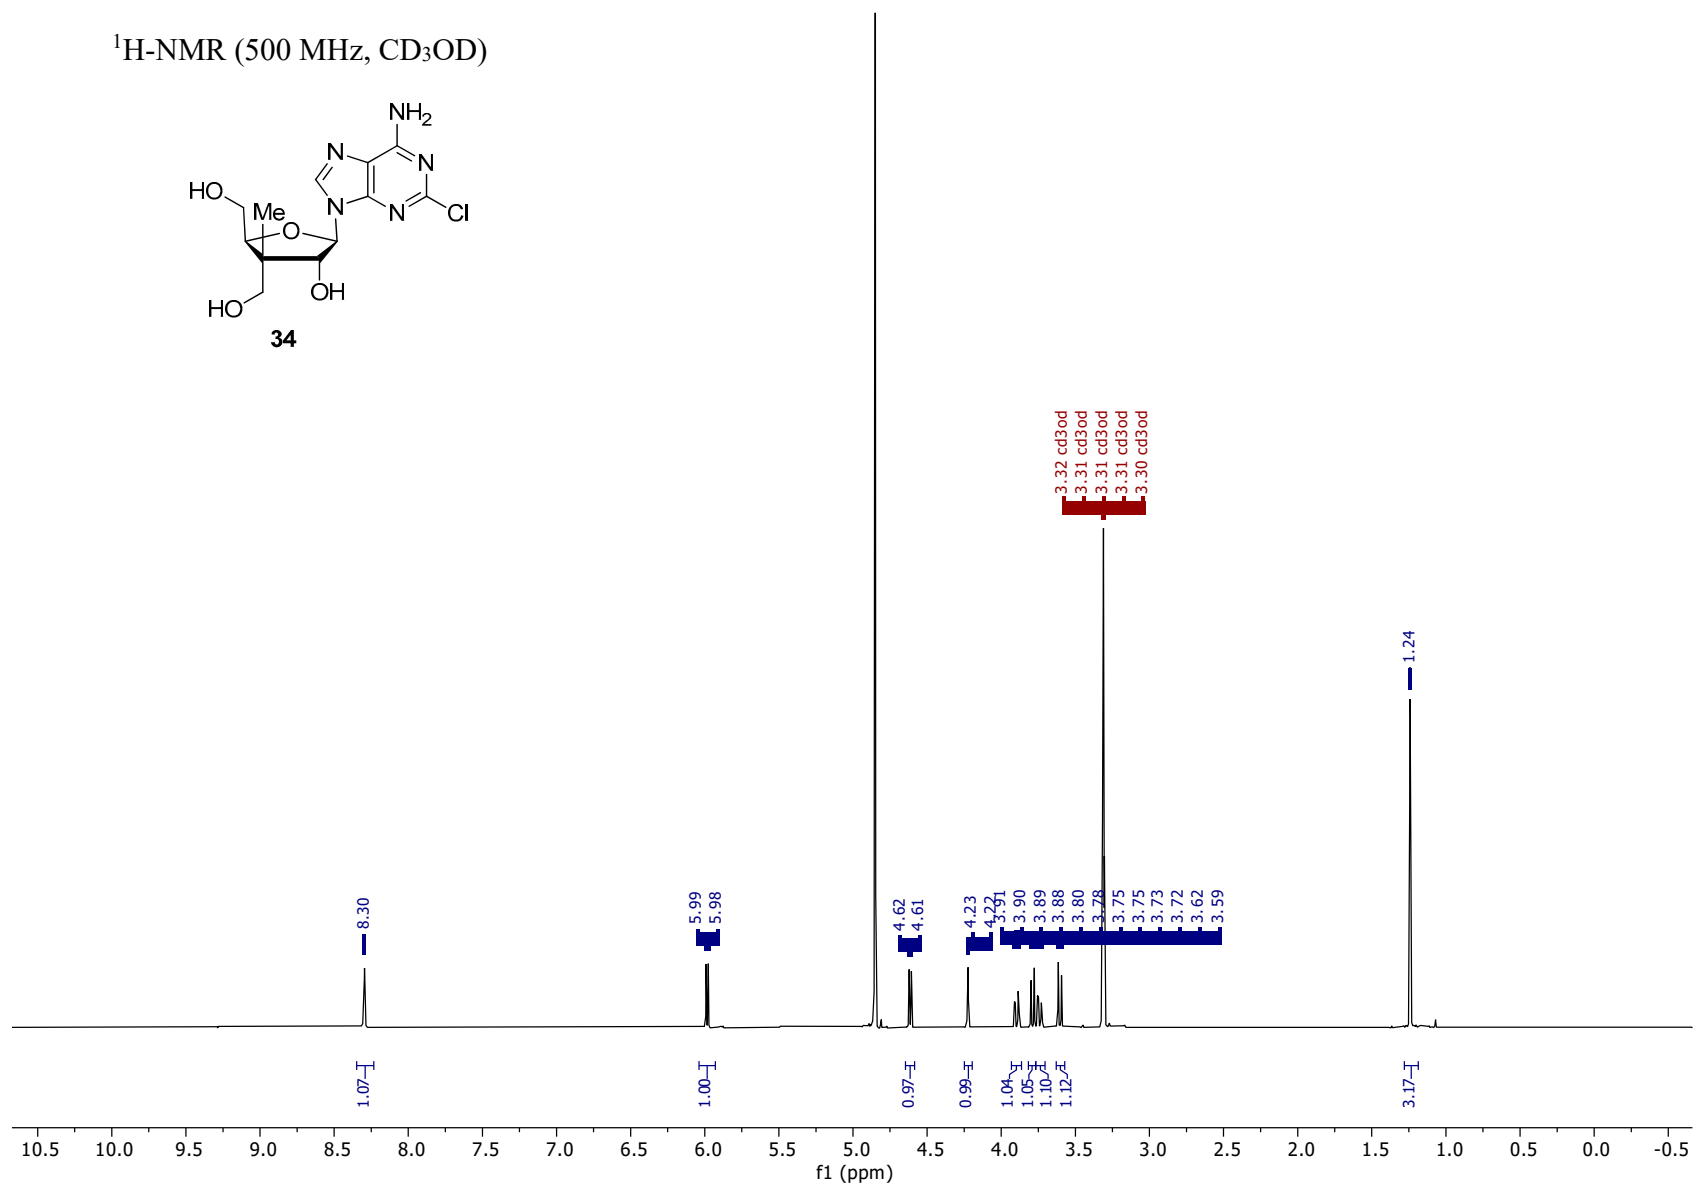

$^{13}\text{C}\{^1\text{H}\}$ -NMR (126 MHz,  $\text{CD}_3\text{OD}$ )

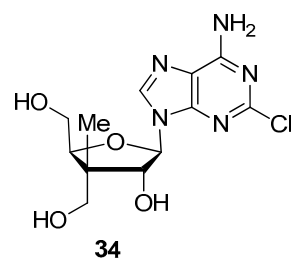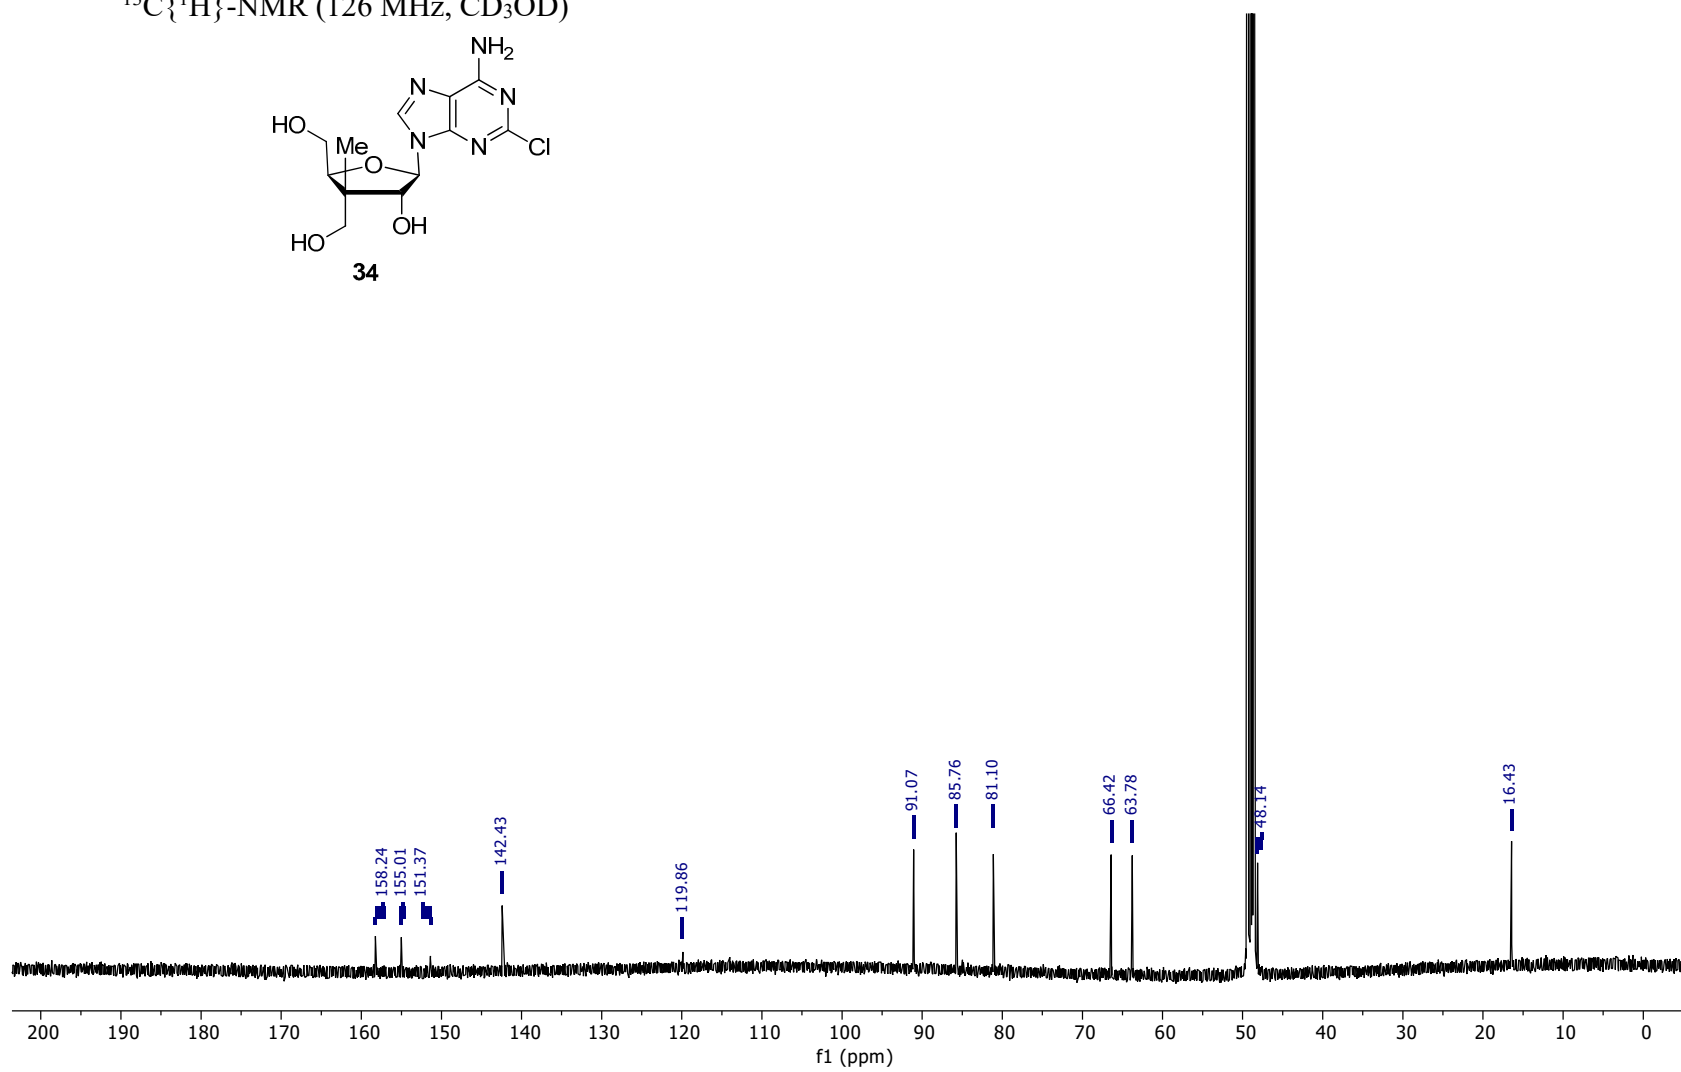

NOESY (500 MHz, CD<sub>3</sub>OD)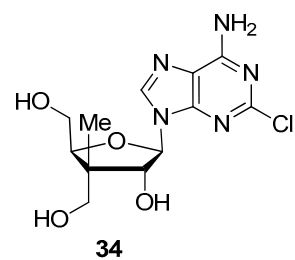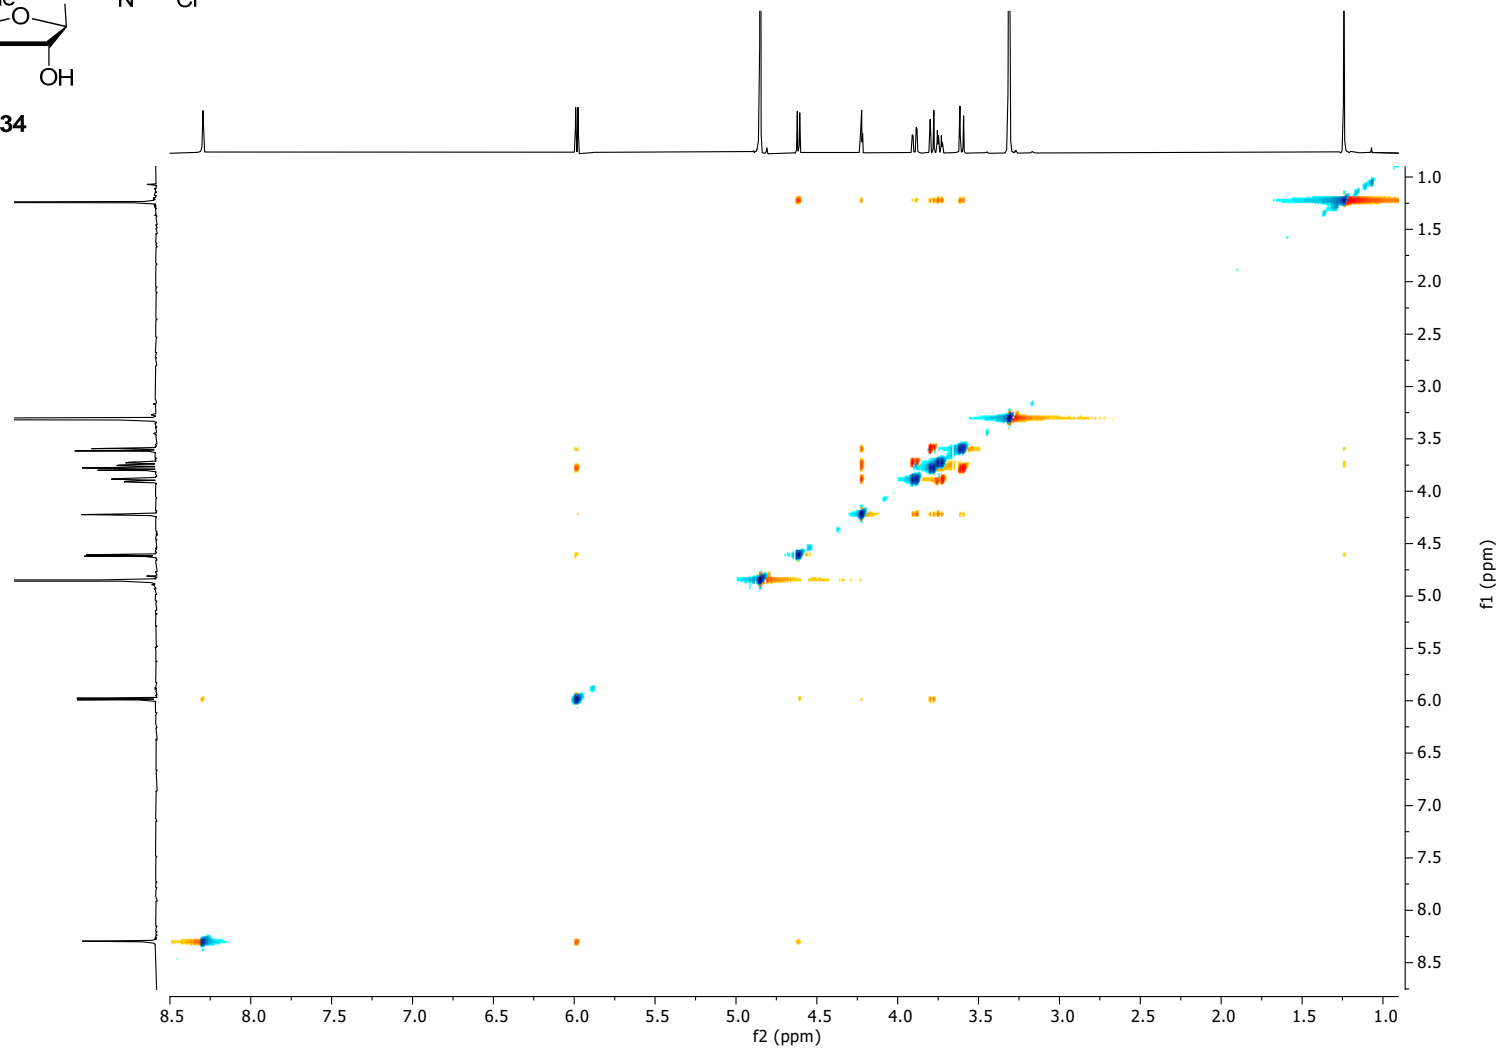

HMBC (500 MHz, CD<sub>3</sub>OD)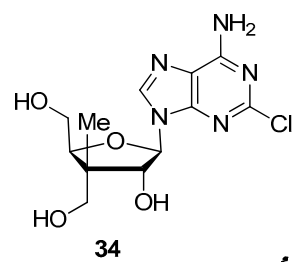**34**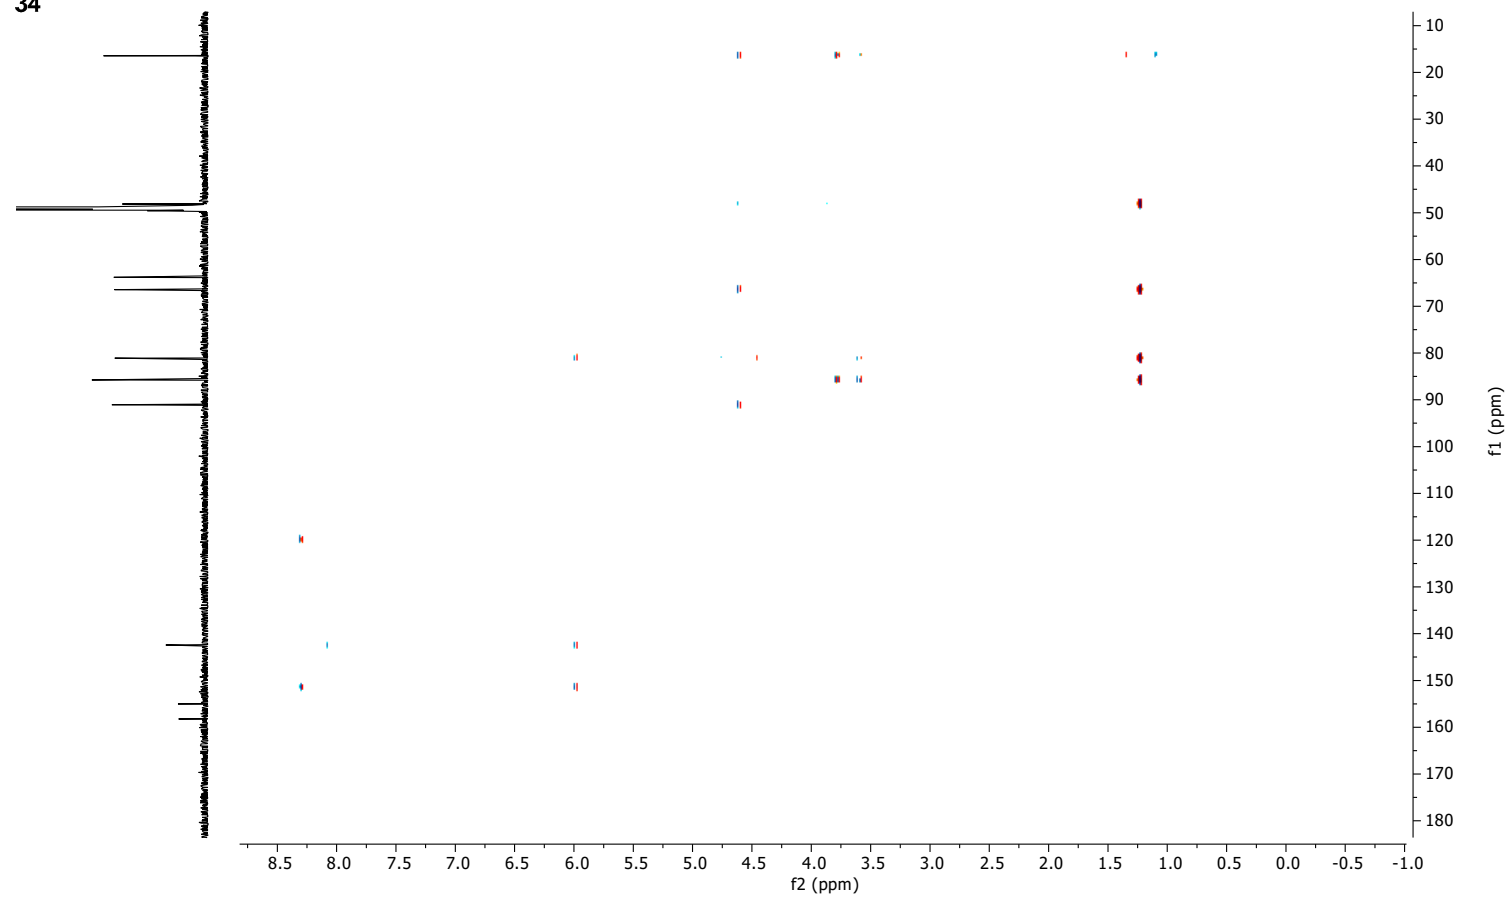

HSQC (500 MHz, CD<sub>3</sub>OD)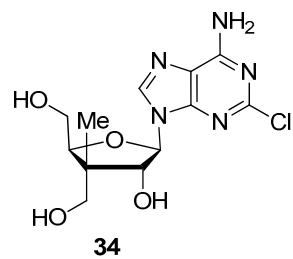**34**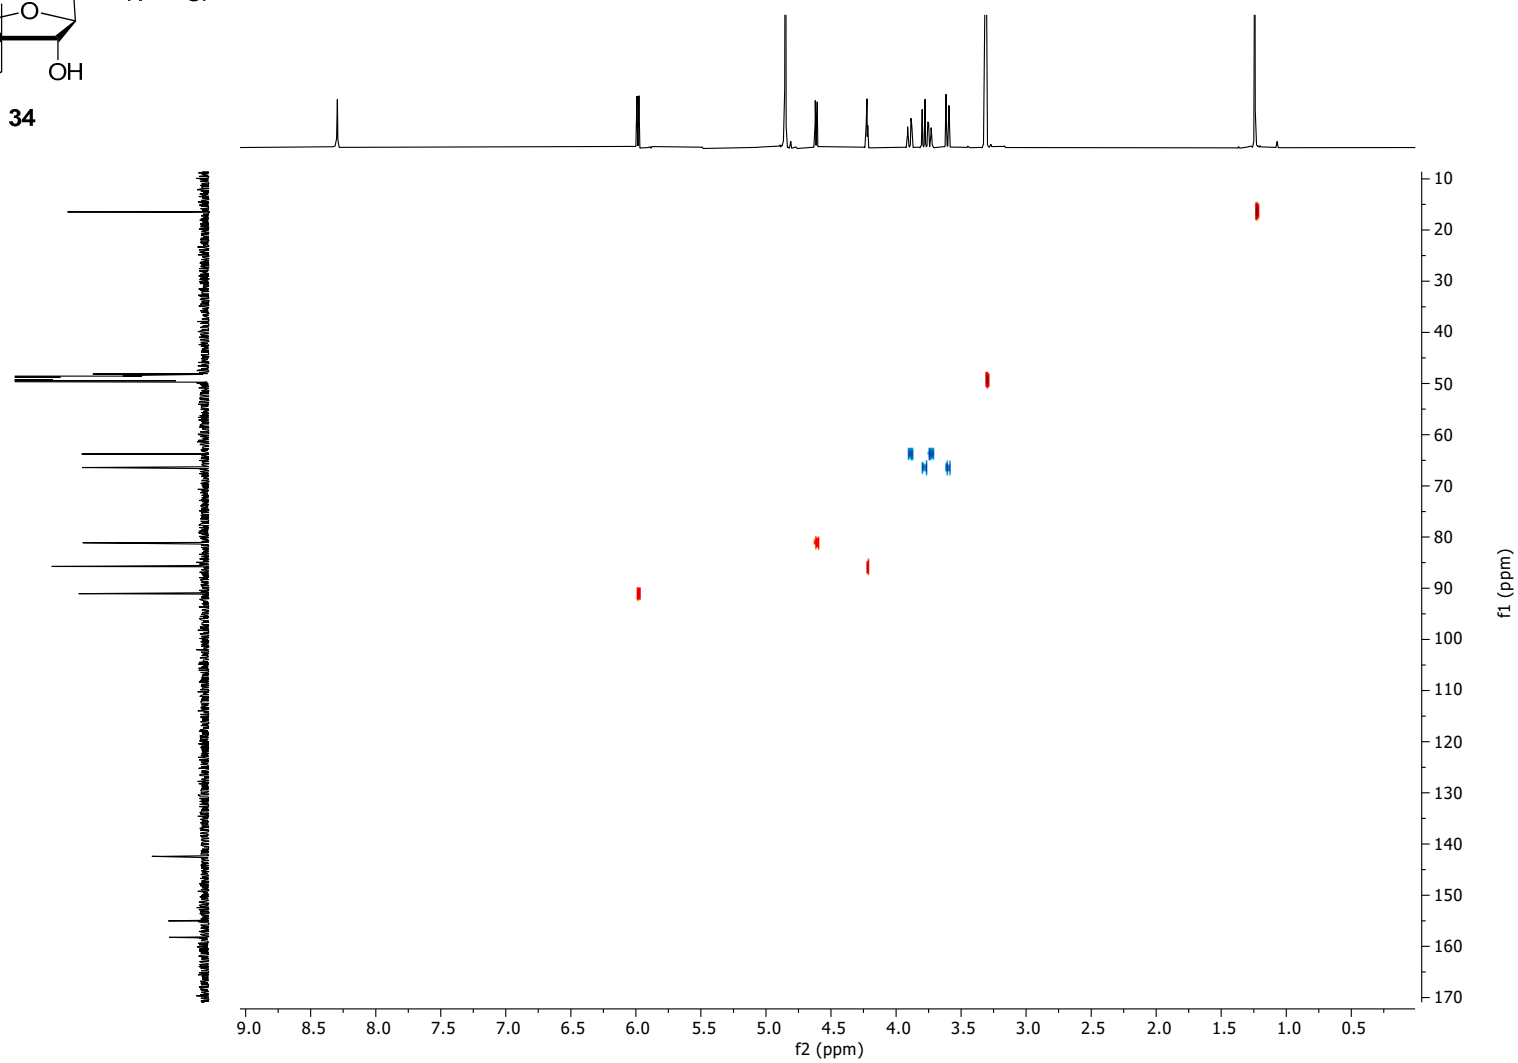

AM-ESP-1007

 $^1\text{H}$ -NMR (500 MHz,  $\text{CDCl}_3$ )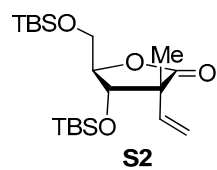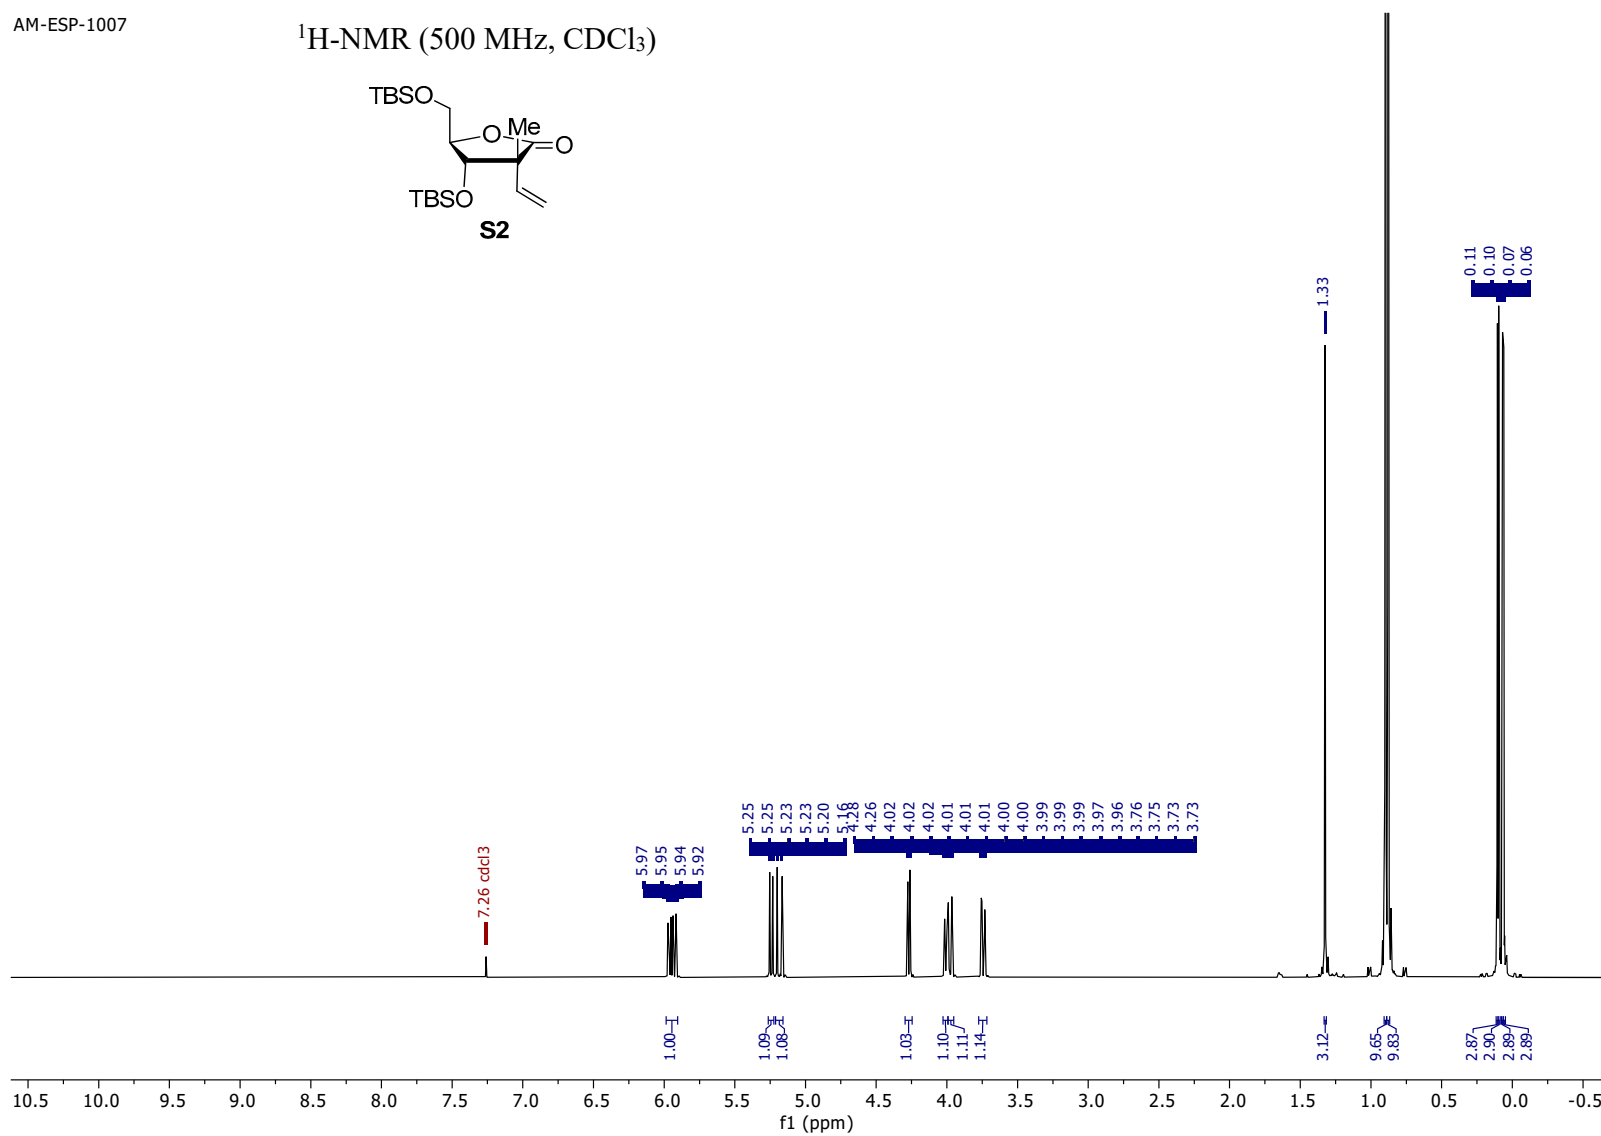



AM-ESP-1007

 $^{13}\text{C}\{^1\text{H}\}$ -NMR (126 MHz,  $\text{CDCl}_3$ )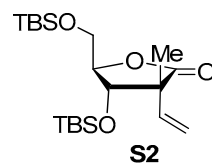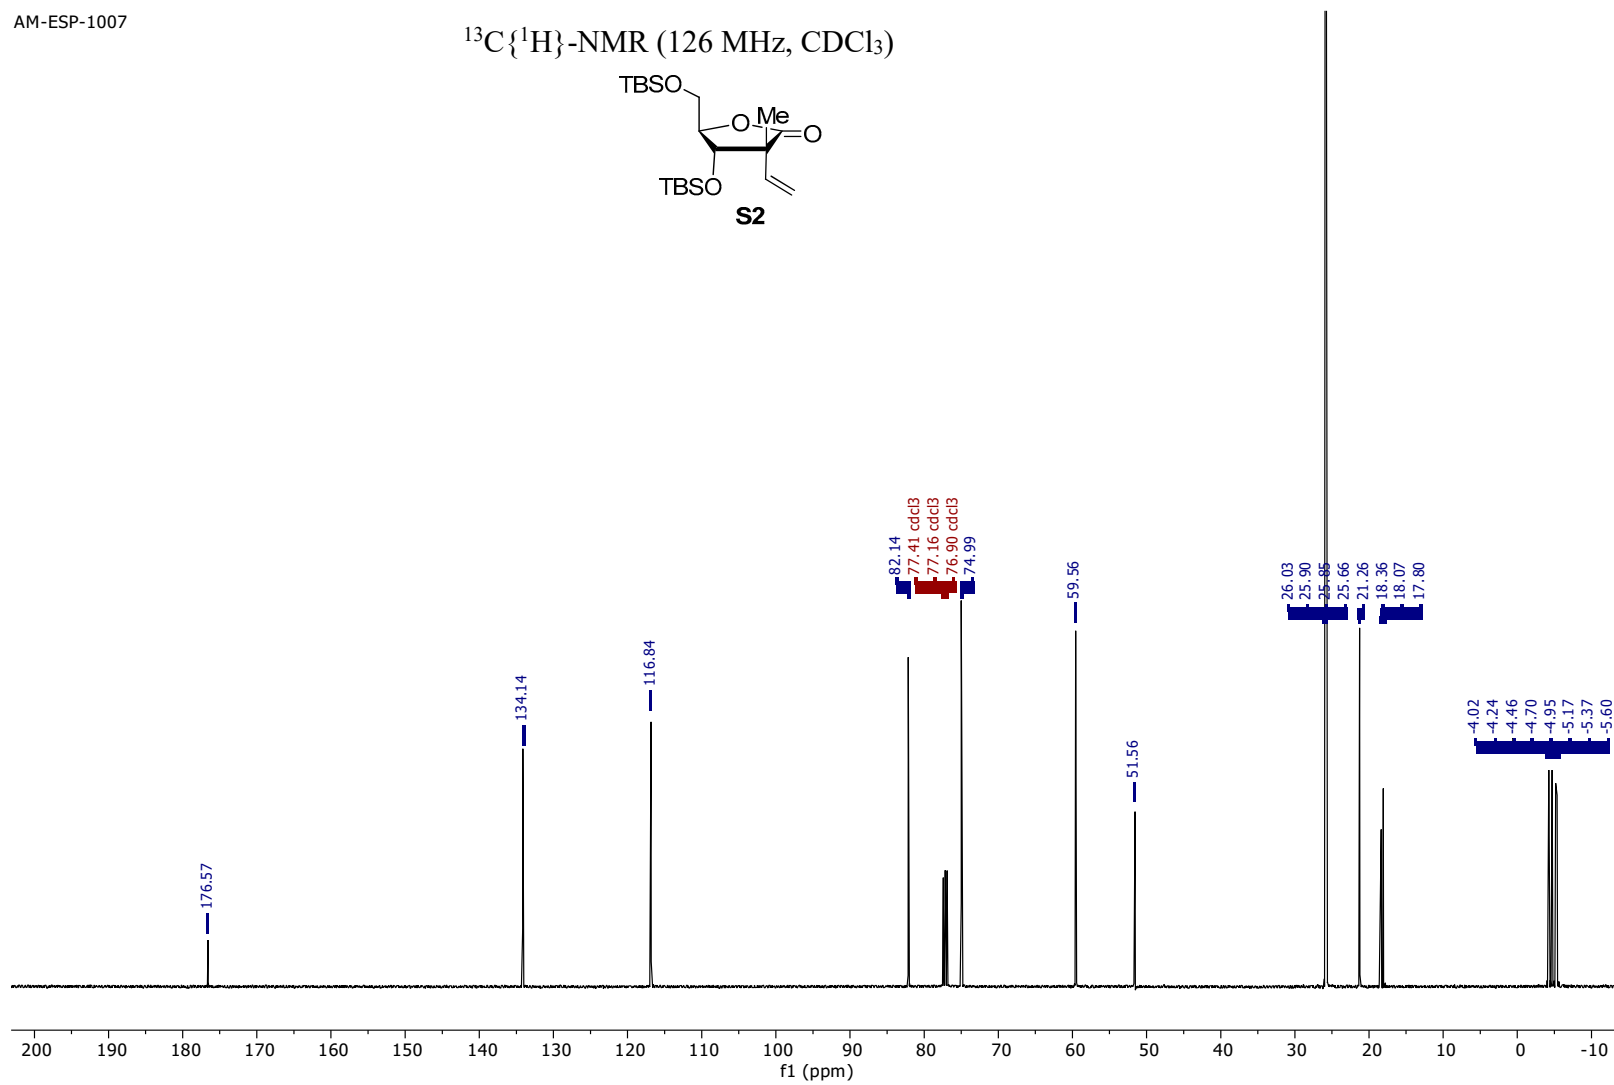

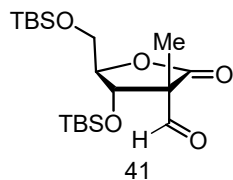

AM-ESP-873

 $^{13}\text{C}\{^1\text{H}\}$ -NMR (126 MHz,  $\text{CDCl}_3$ )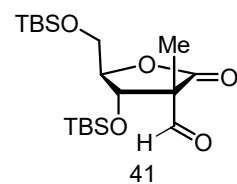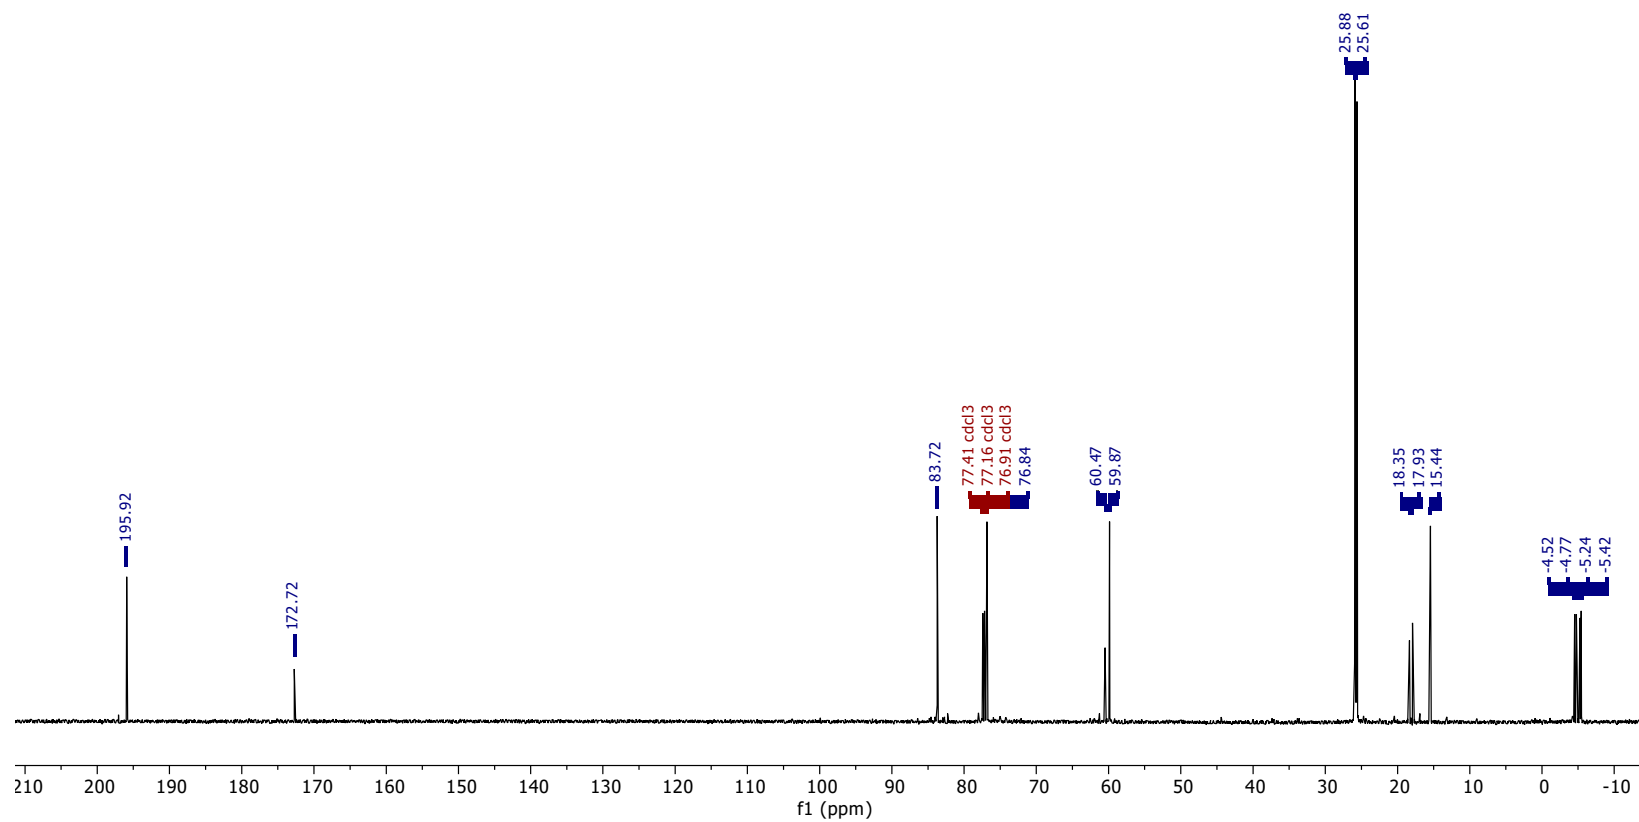

AM-ESP-800

 $^1\text{H}$ -NMR (500 MHz,  $\text{CDCl}_3$ )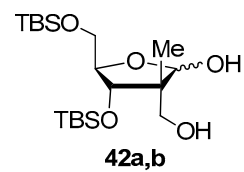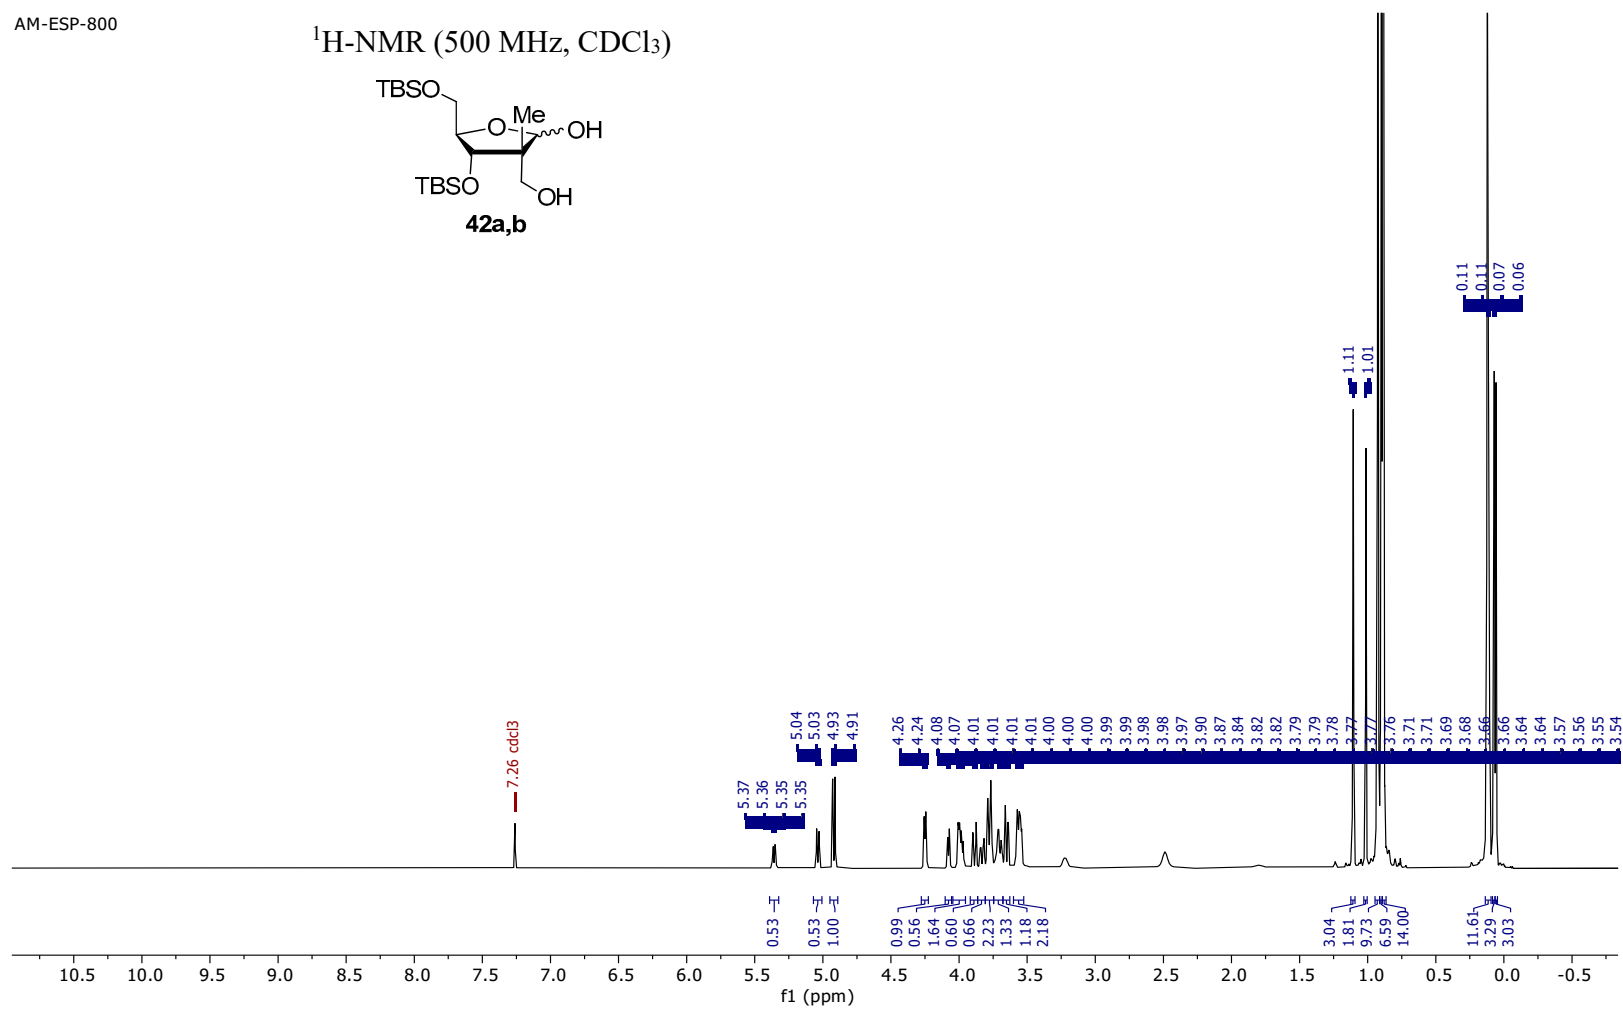

AM-ESP-800

 $^{13}\text{C}\{^1\text{H}\}$ -NMR (126 MHz,  $\text{CDCl}_3$ )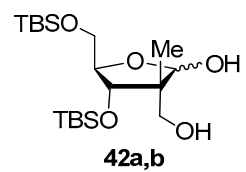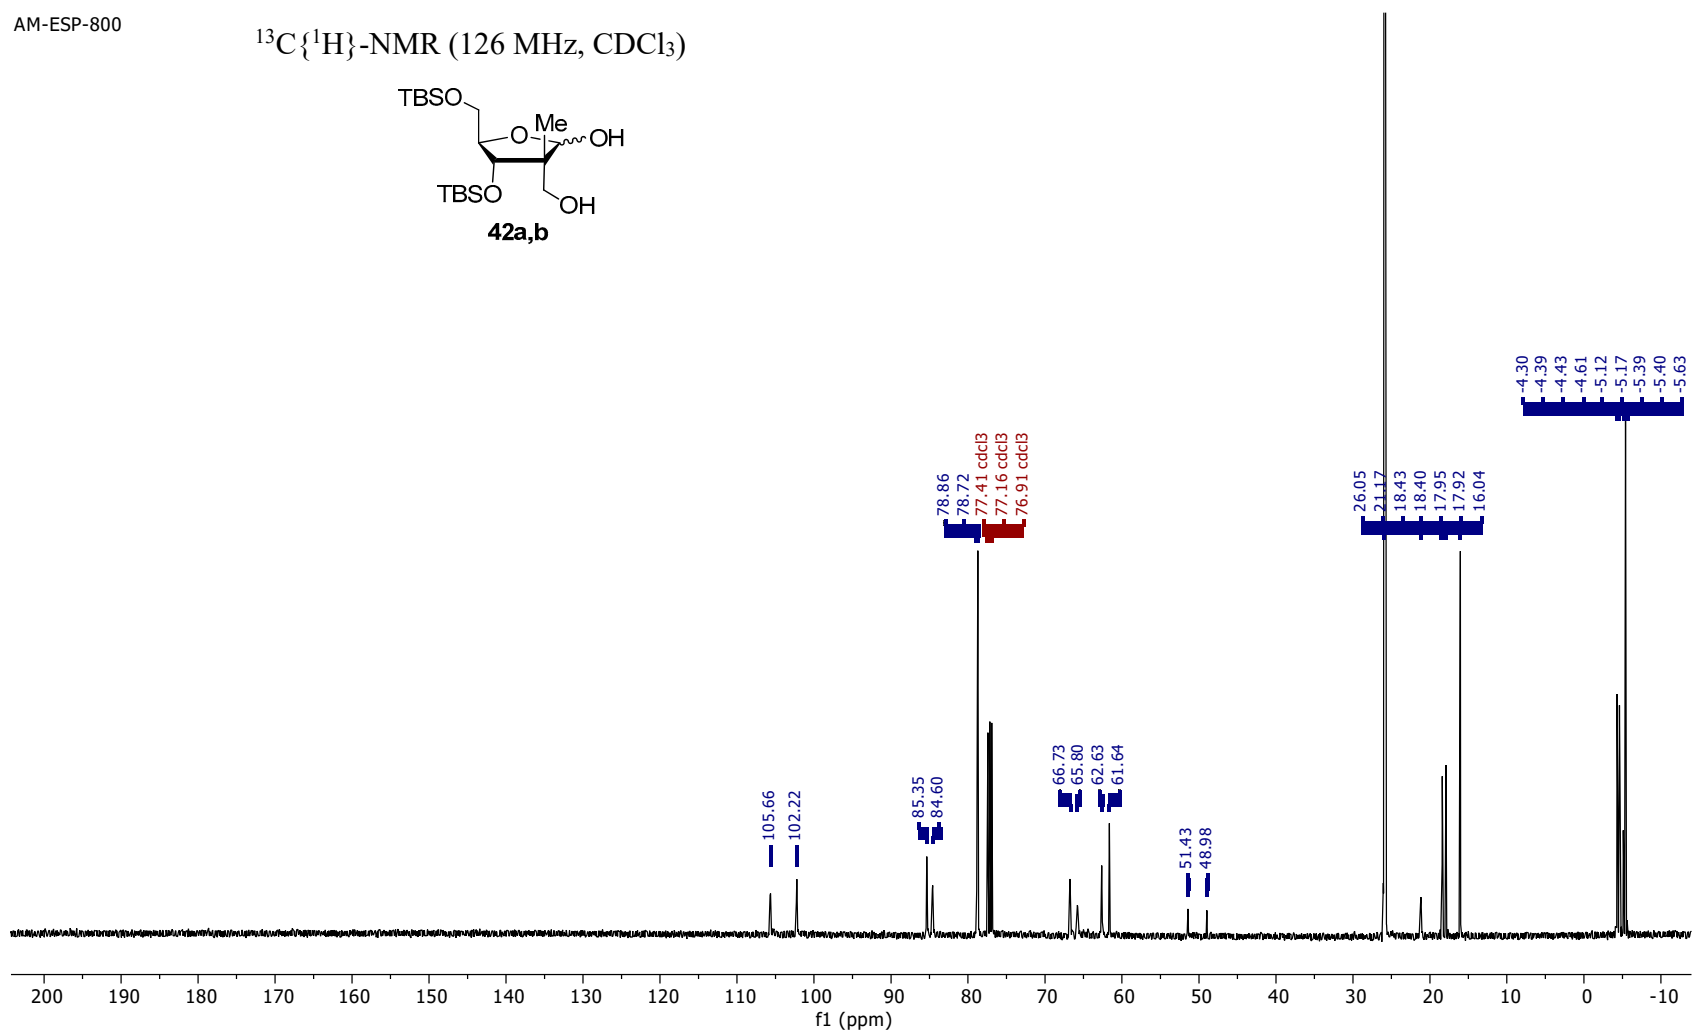

**43a,b**

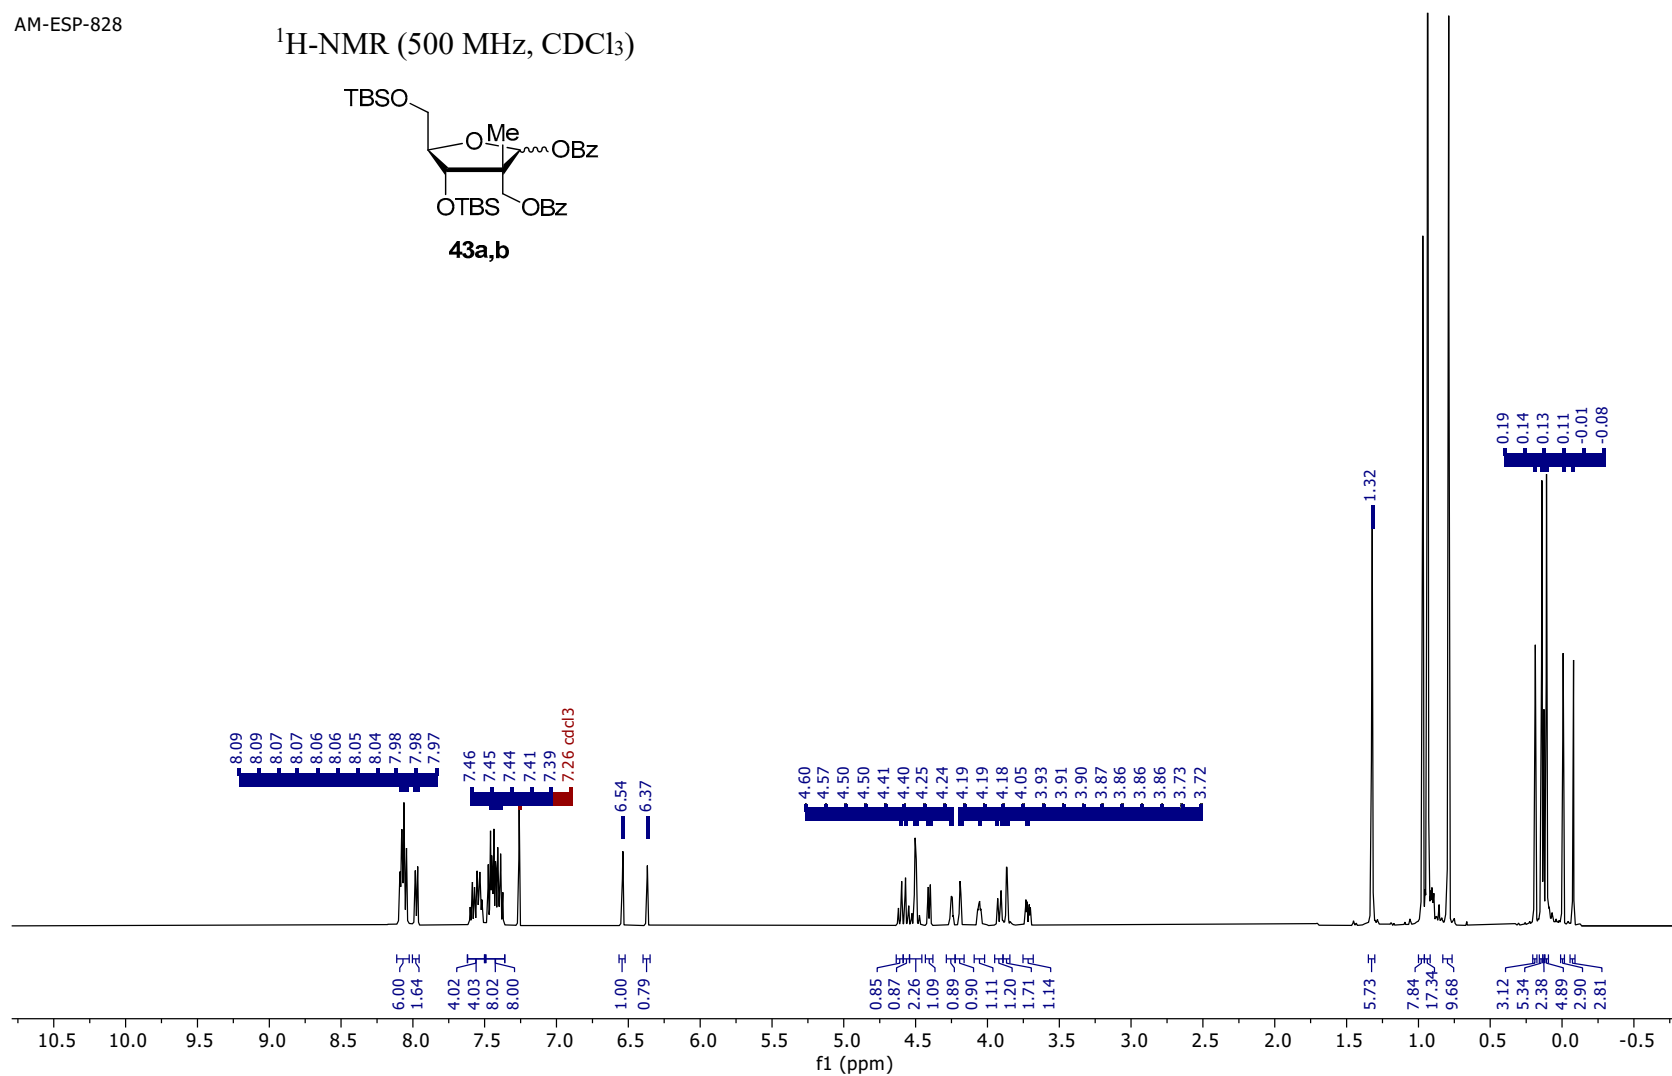

AM-ESP-828

 $^{13}\text{C}\{^1\text{H}\}$ -NMR (126 MHz,  $\text{CDCl}_3$ )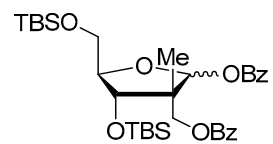**43a,b**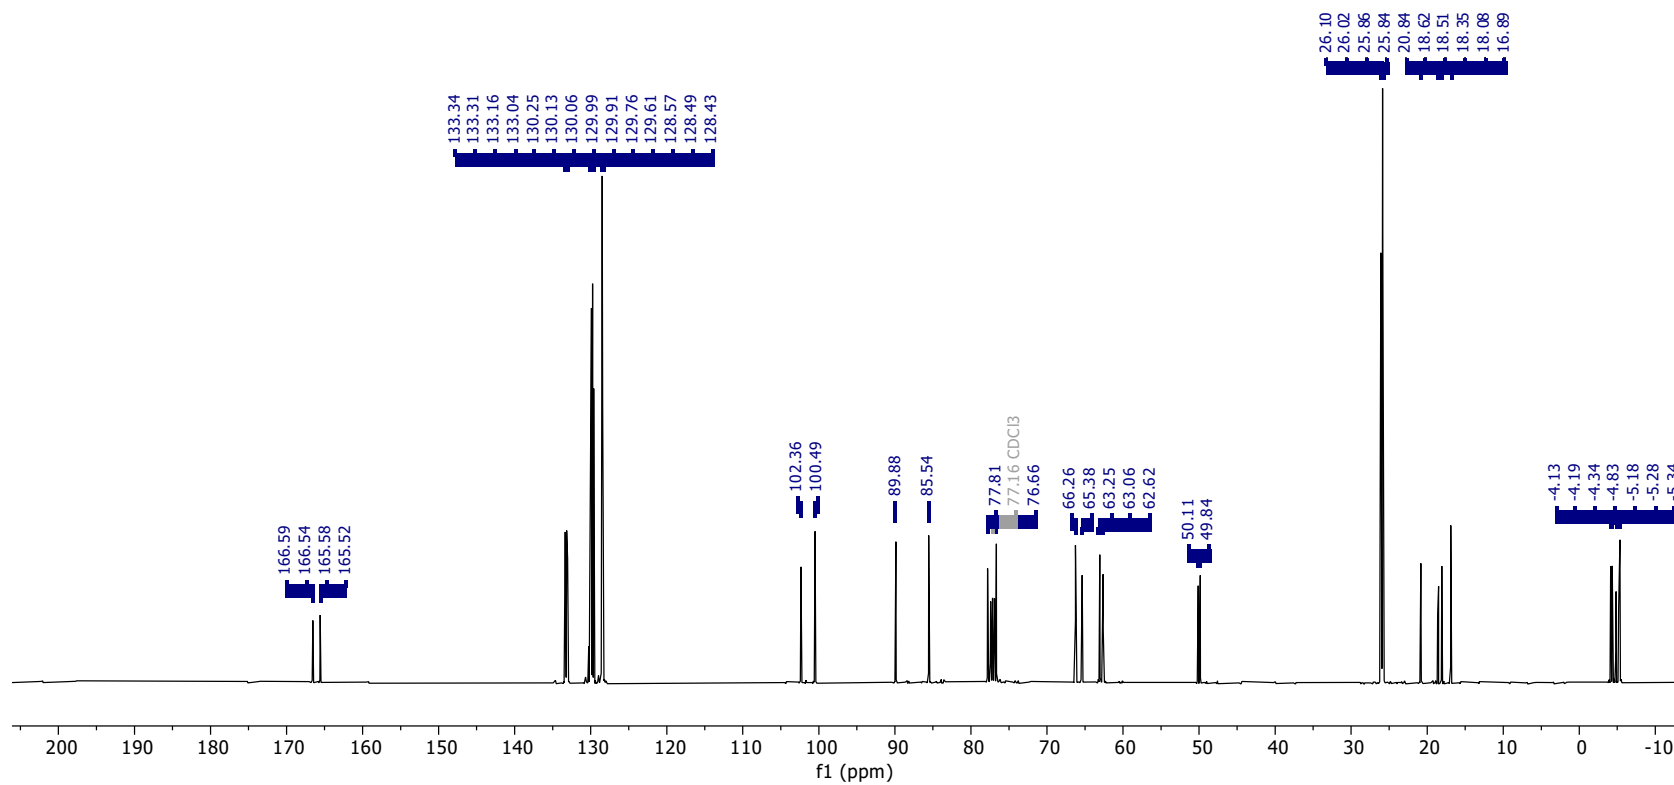

$^1\text{H}$ -NMR (500 MHz,  $\text{CDCl}_3$ )

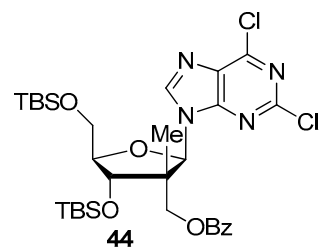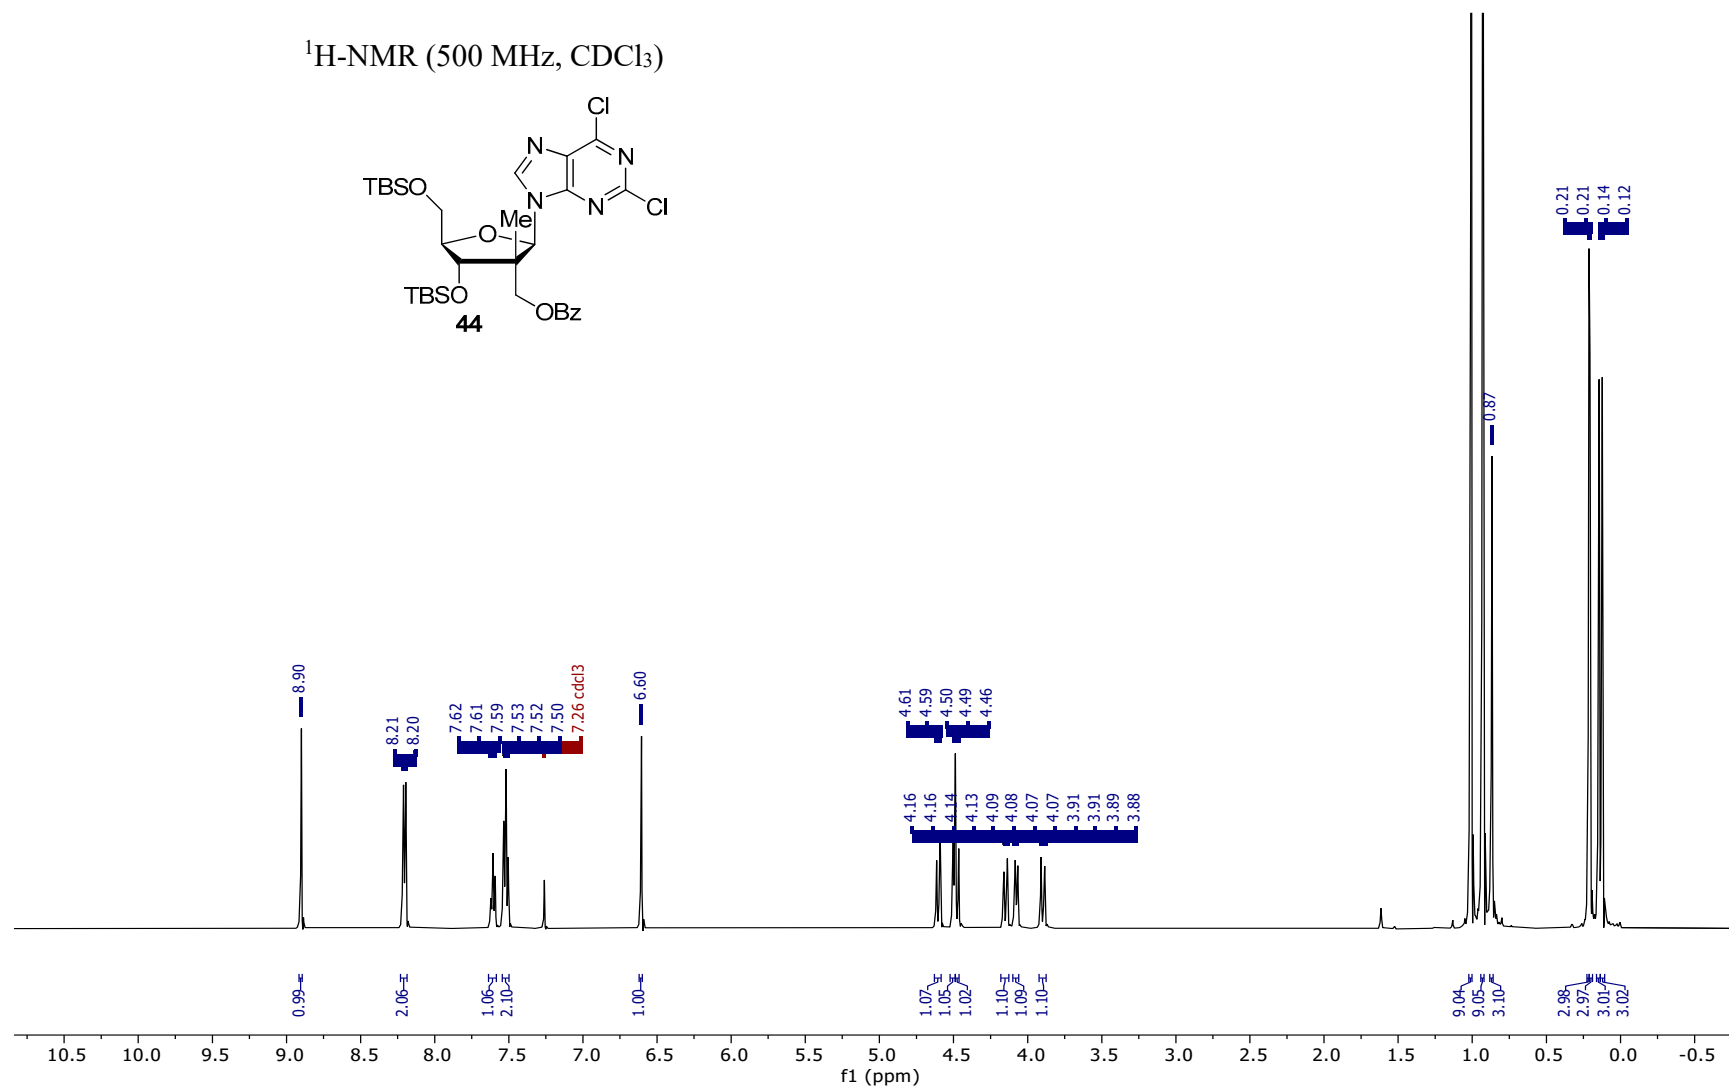



$^{13}\text{C}\{^1\text{H}\}$ -NMR (126 MHz,  $\text{CDCl}_3$ )

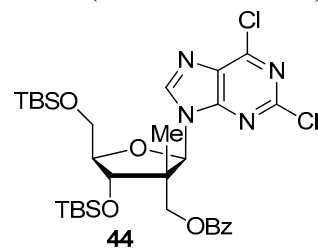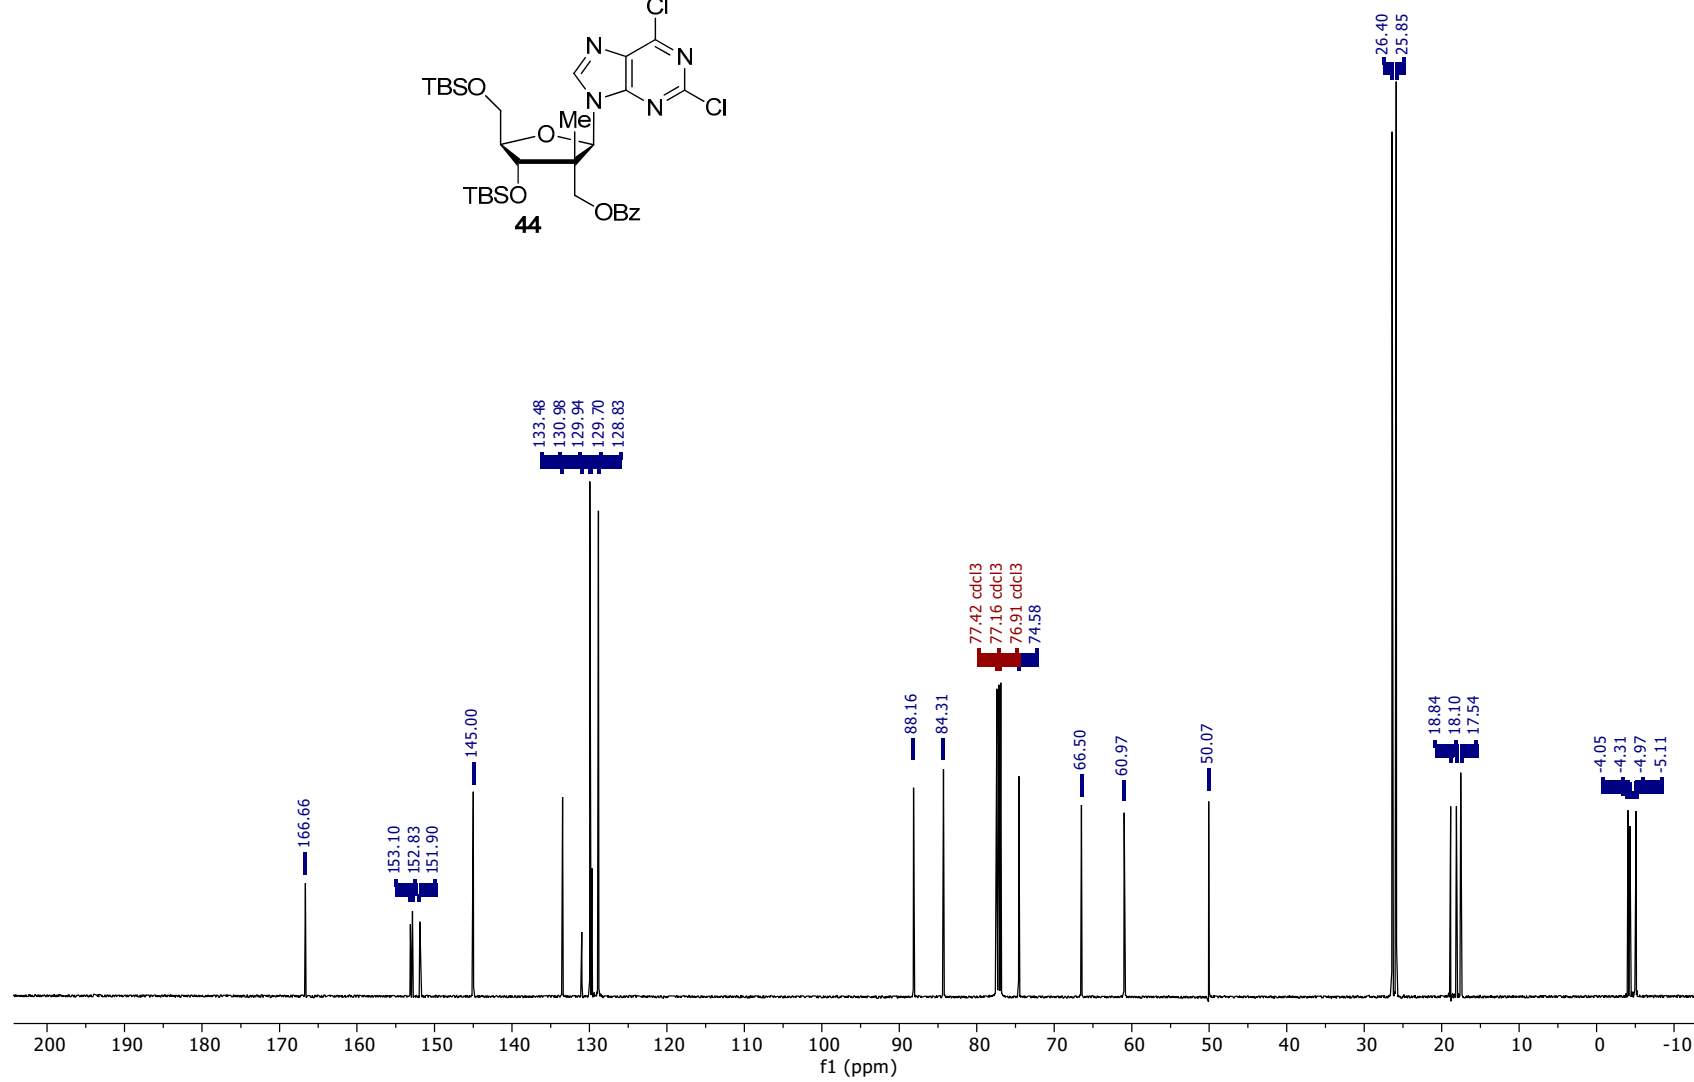

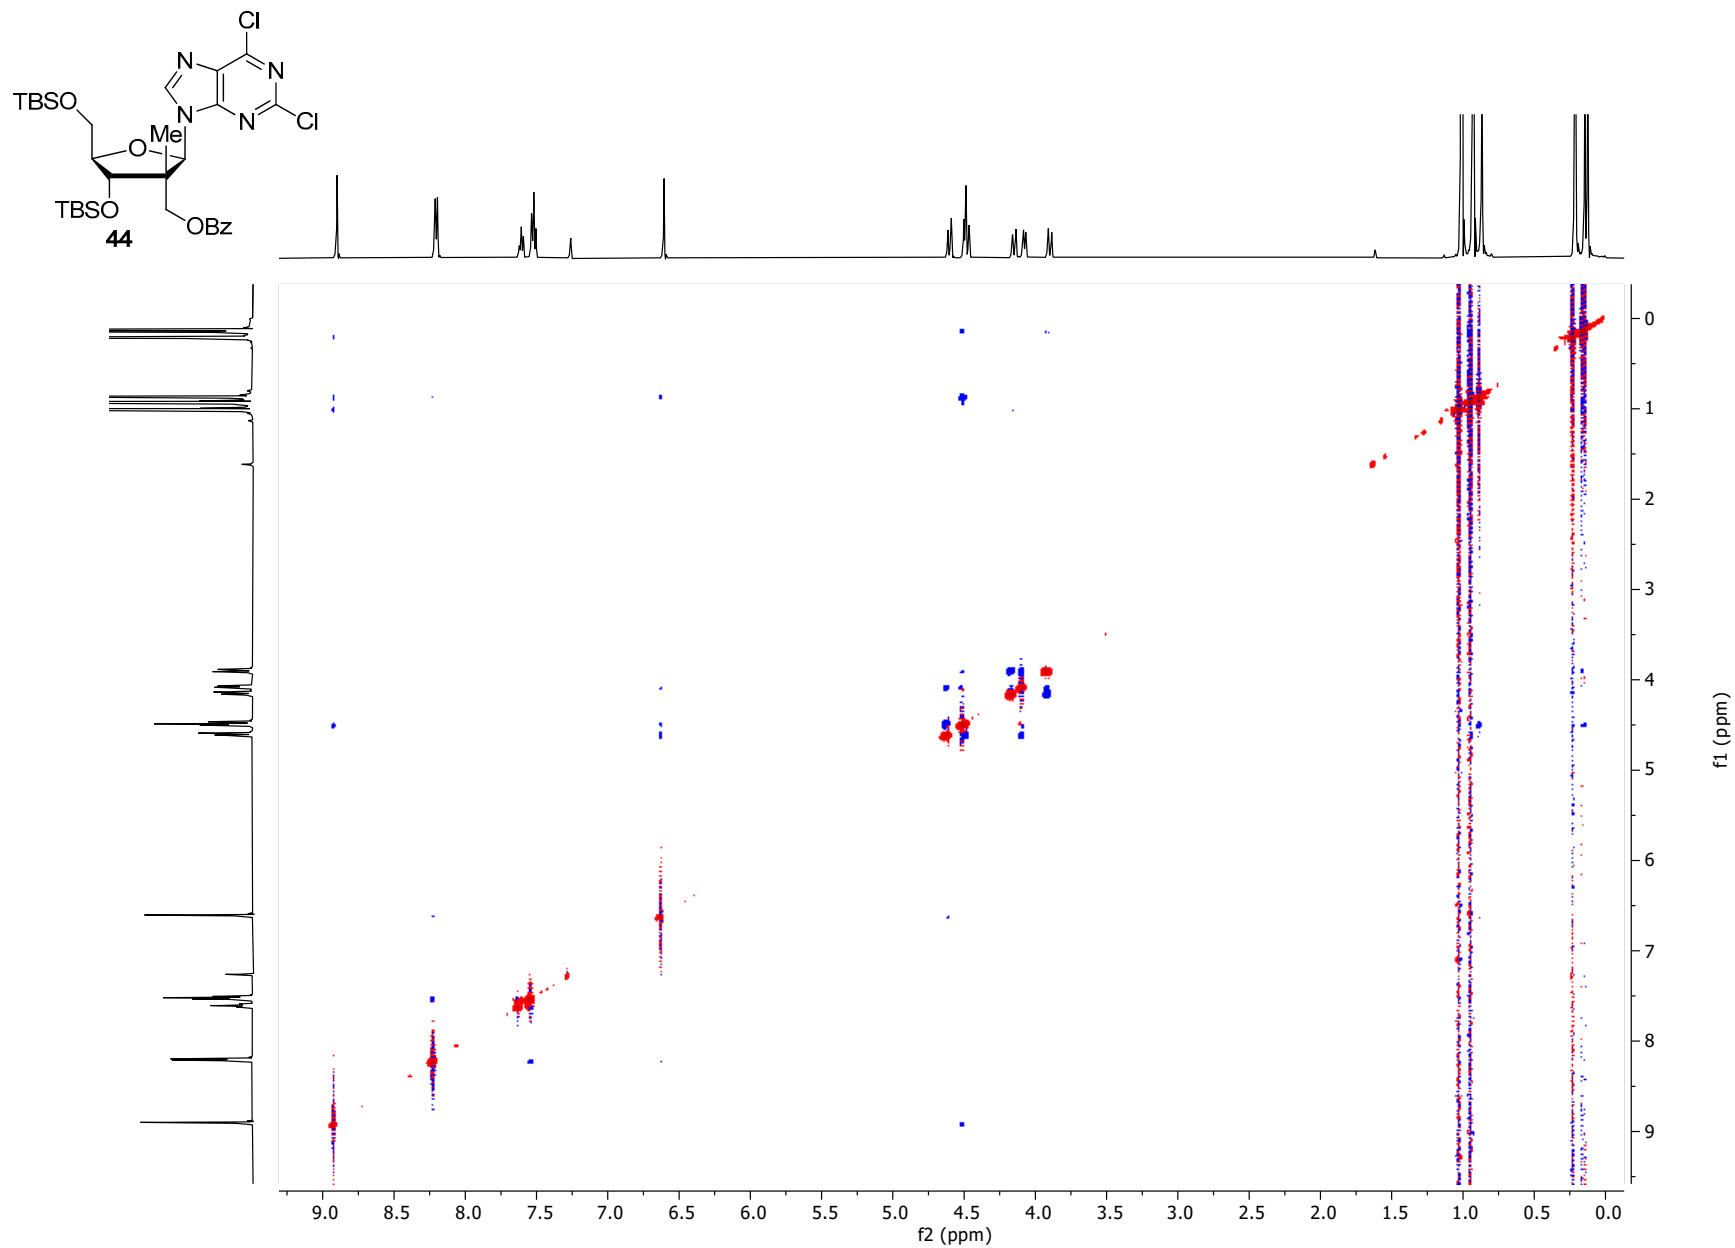

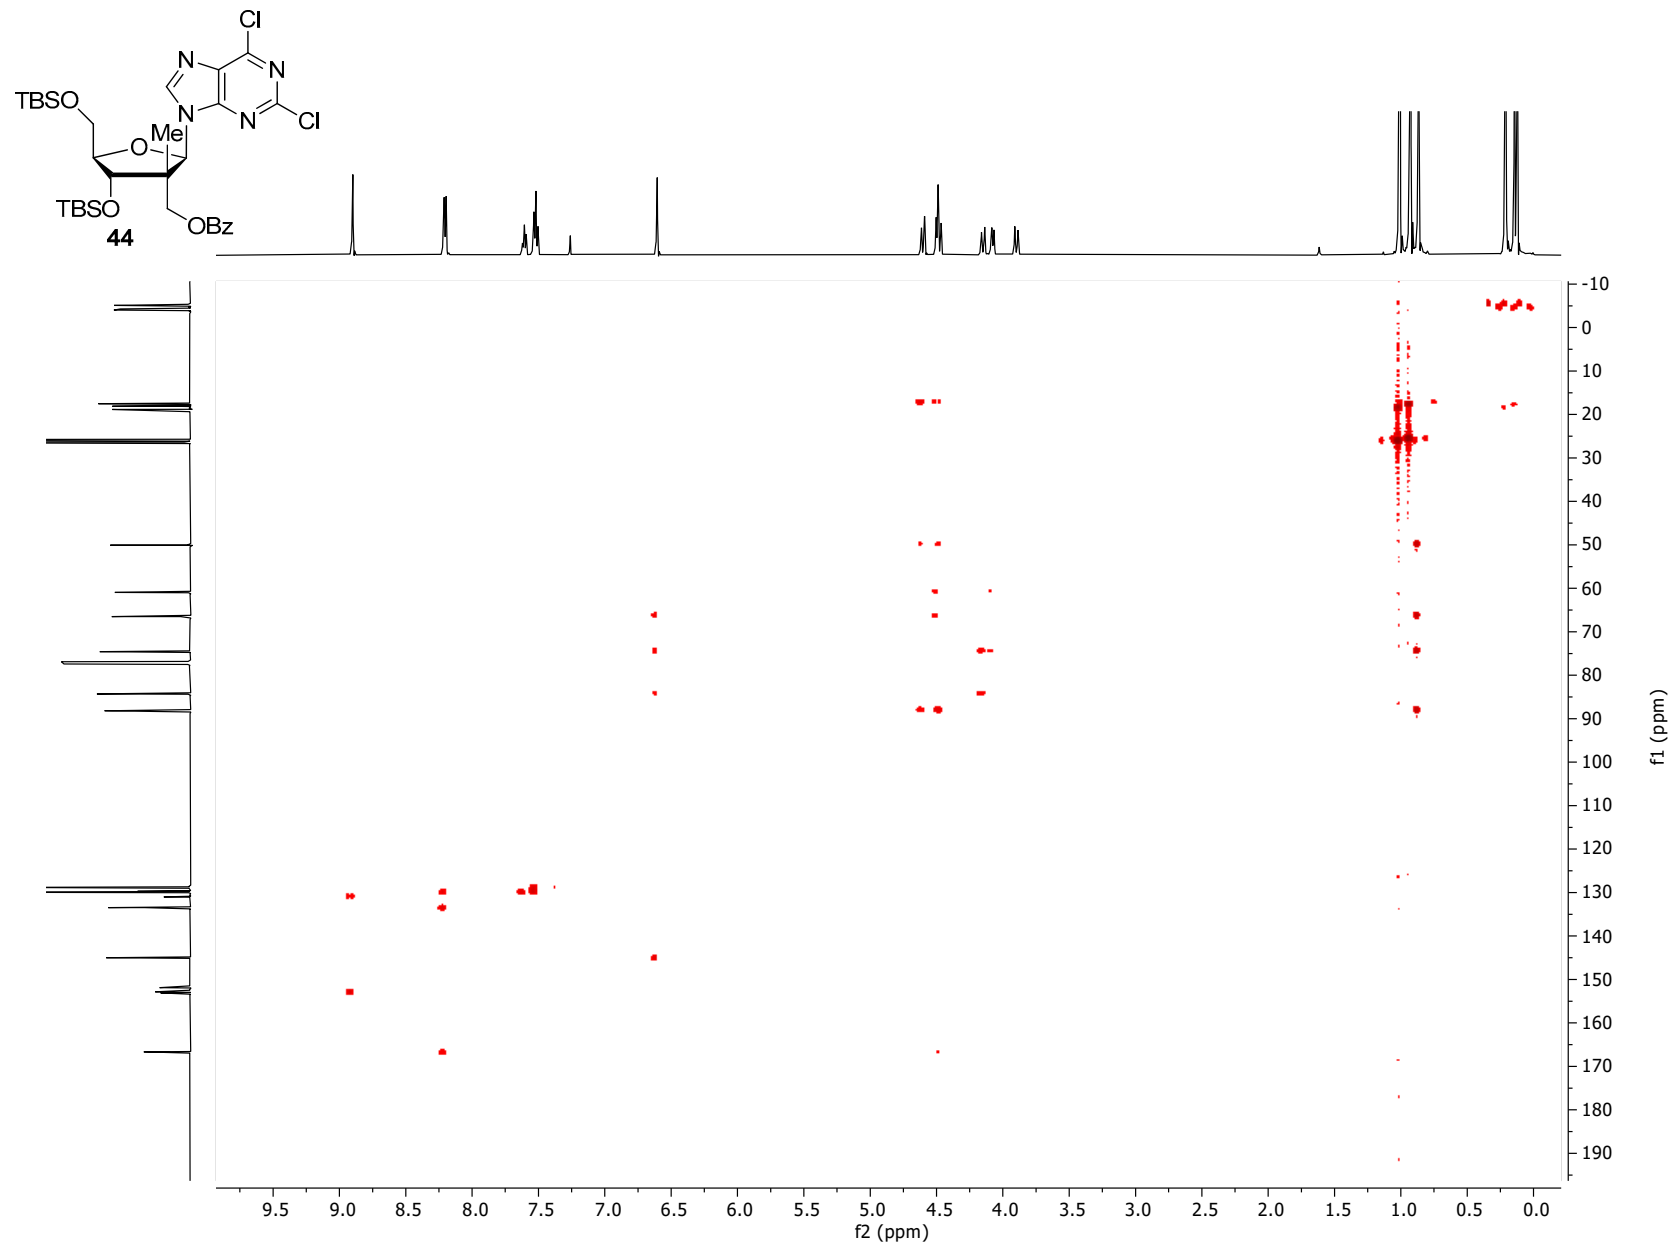

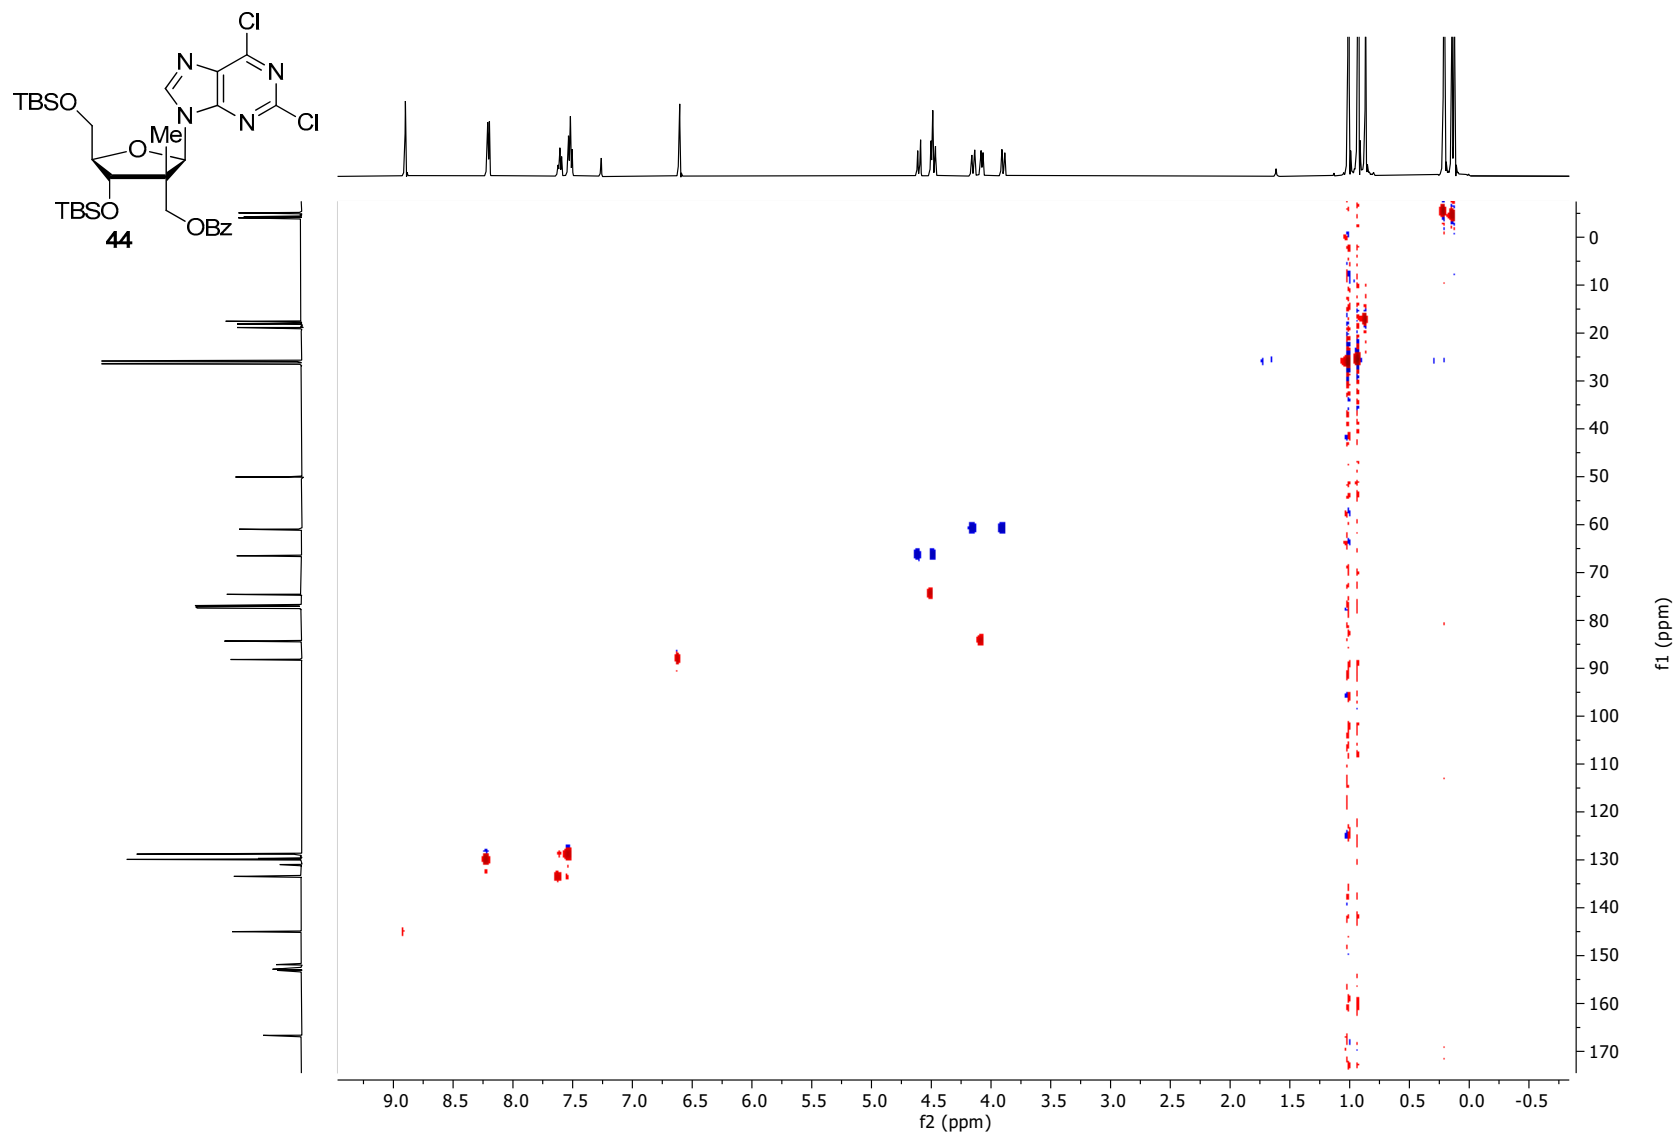

$^1\text{H}$ -NMR (500 MHz,  $\text{CDCl}_3$ )

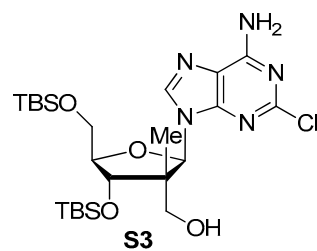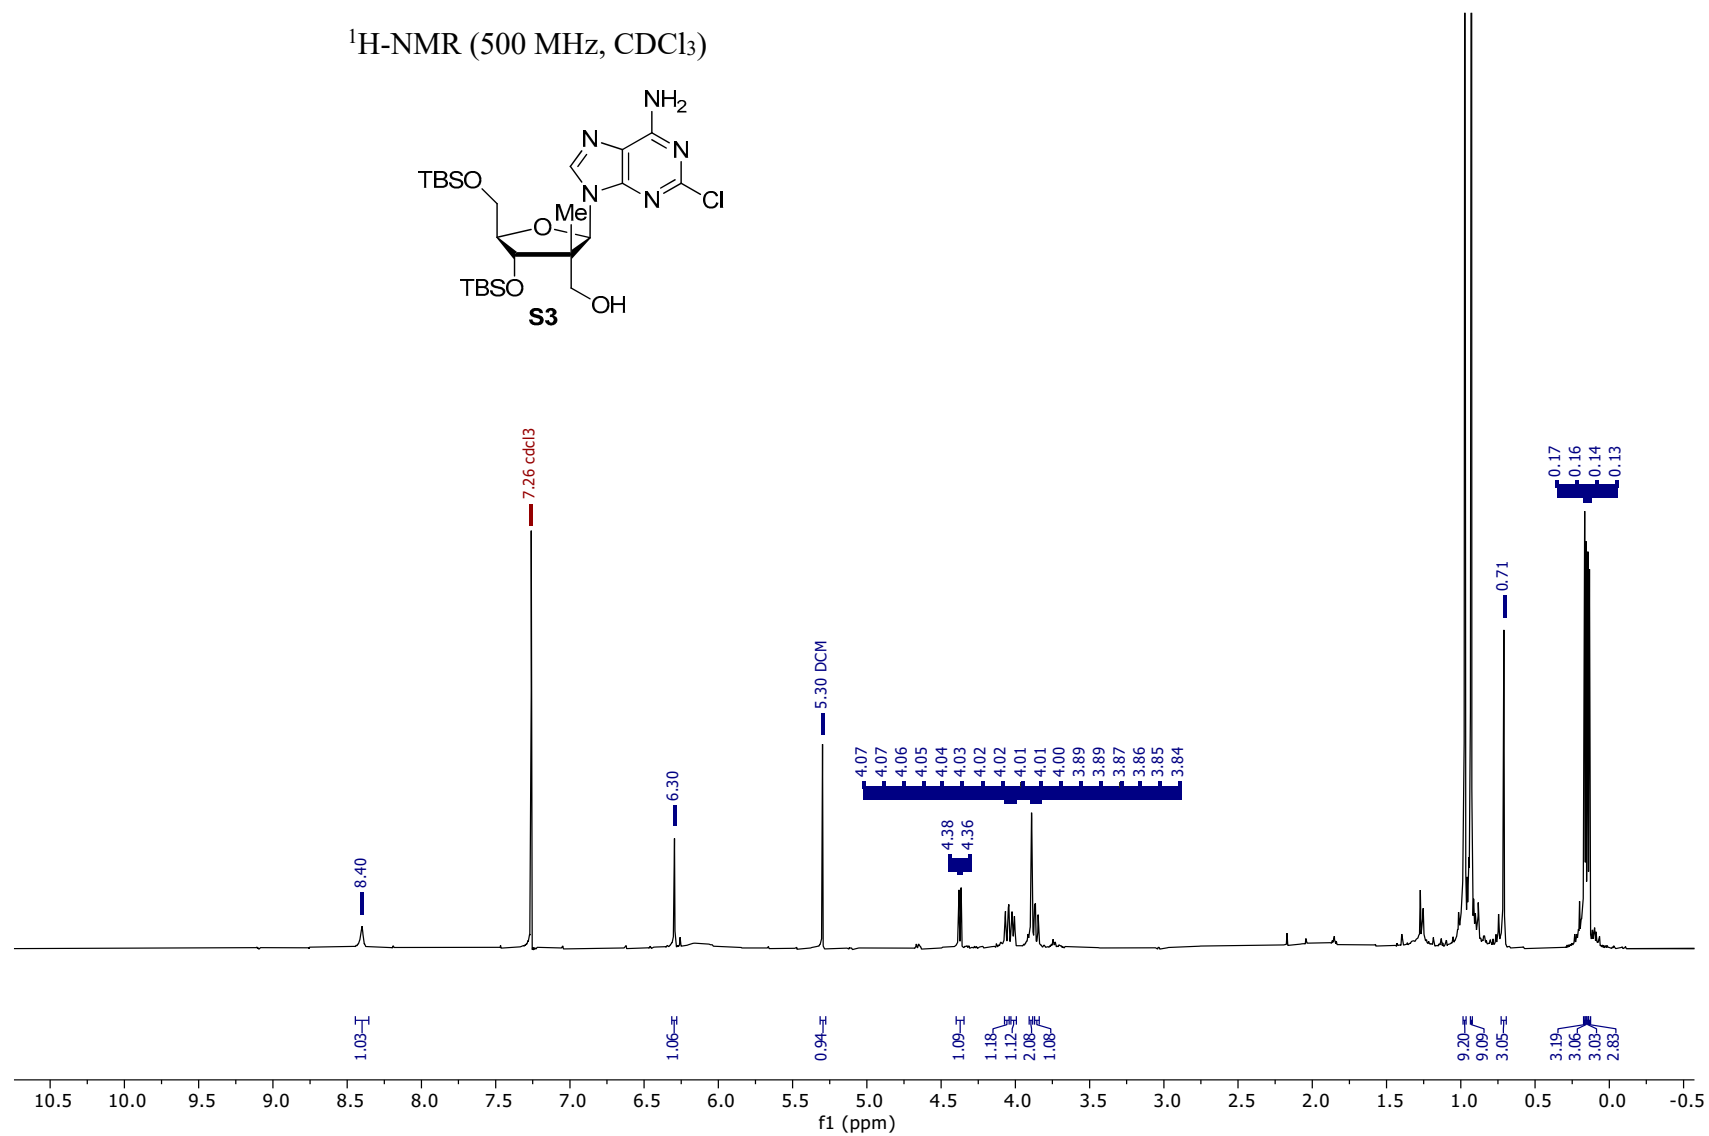

$^{13}\text{C}\{^1\text{H}\}$ -NMR (126 MHz,  $\text{CDCl}_3$ )

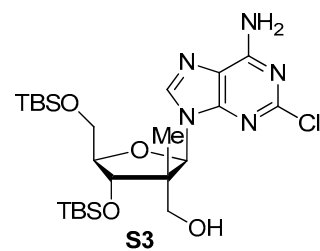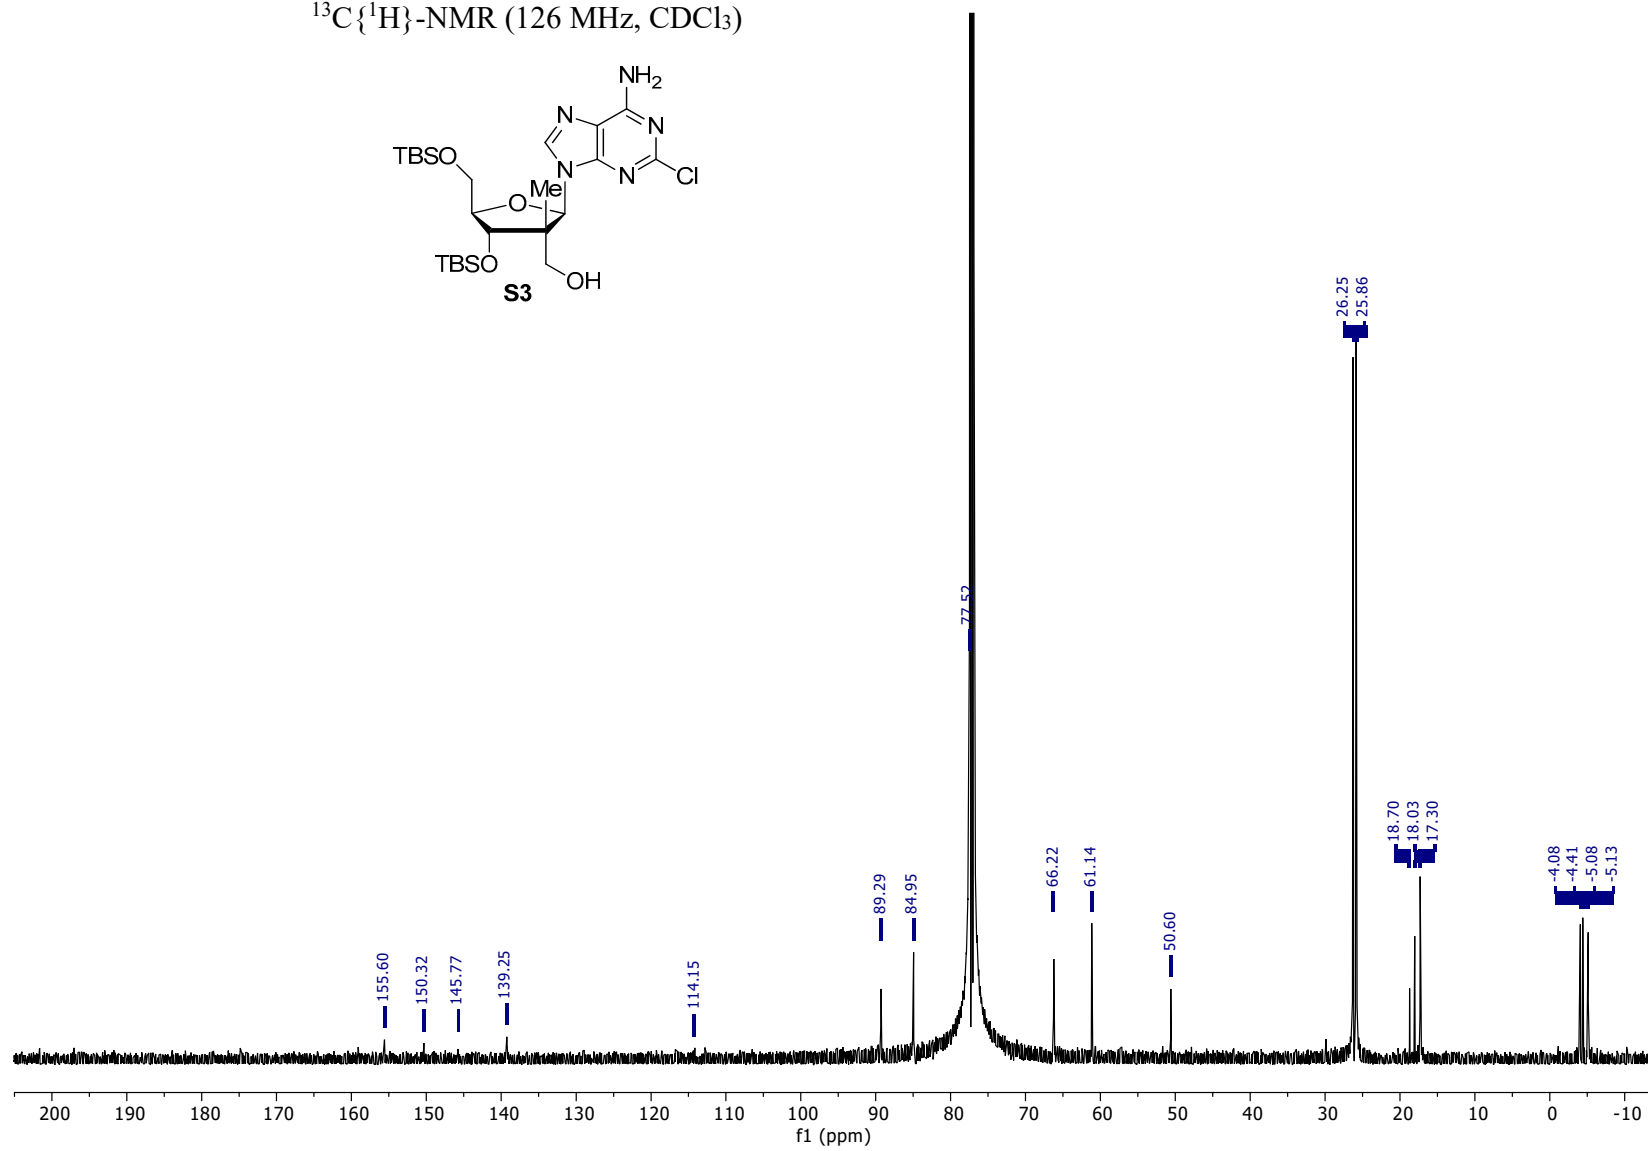

$^1\text{H}$ -NMR (500 MHz,  $\text{CD}_3\text{OD}$ )

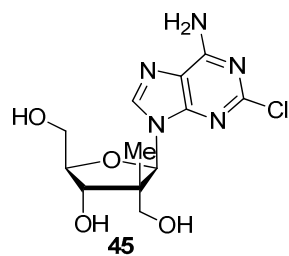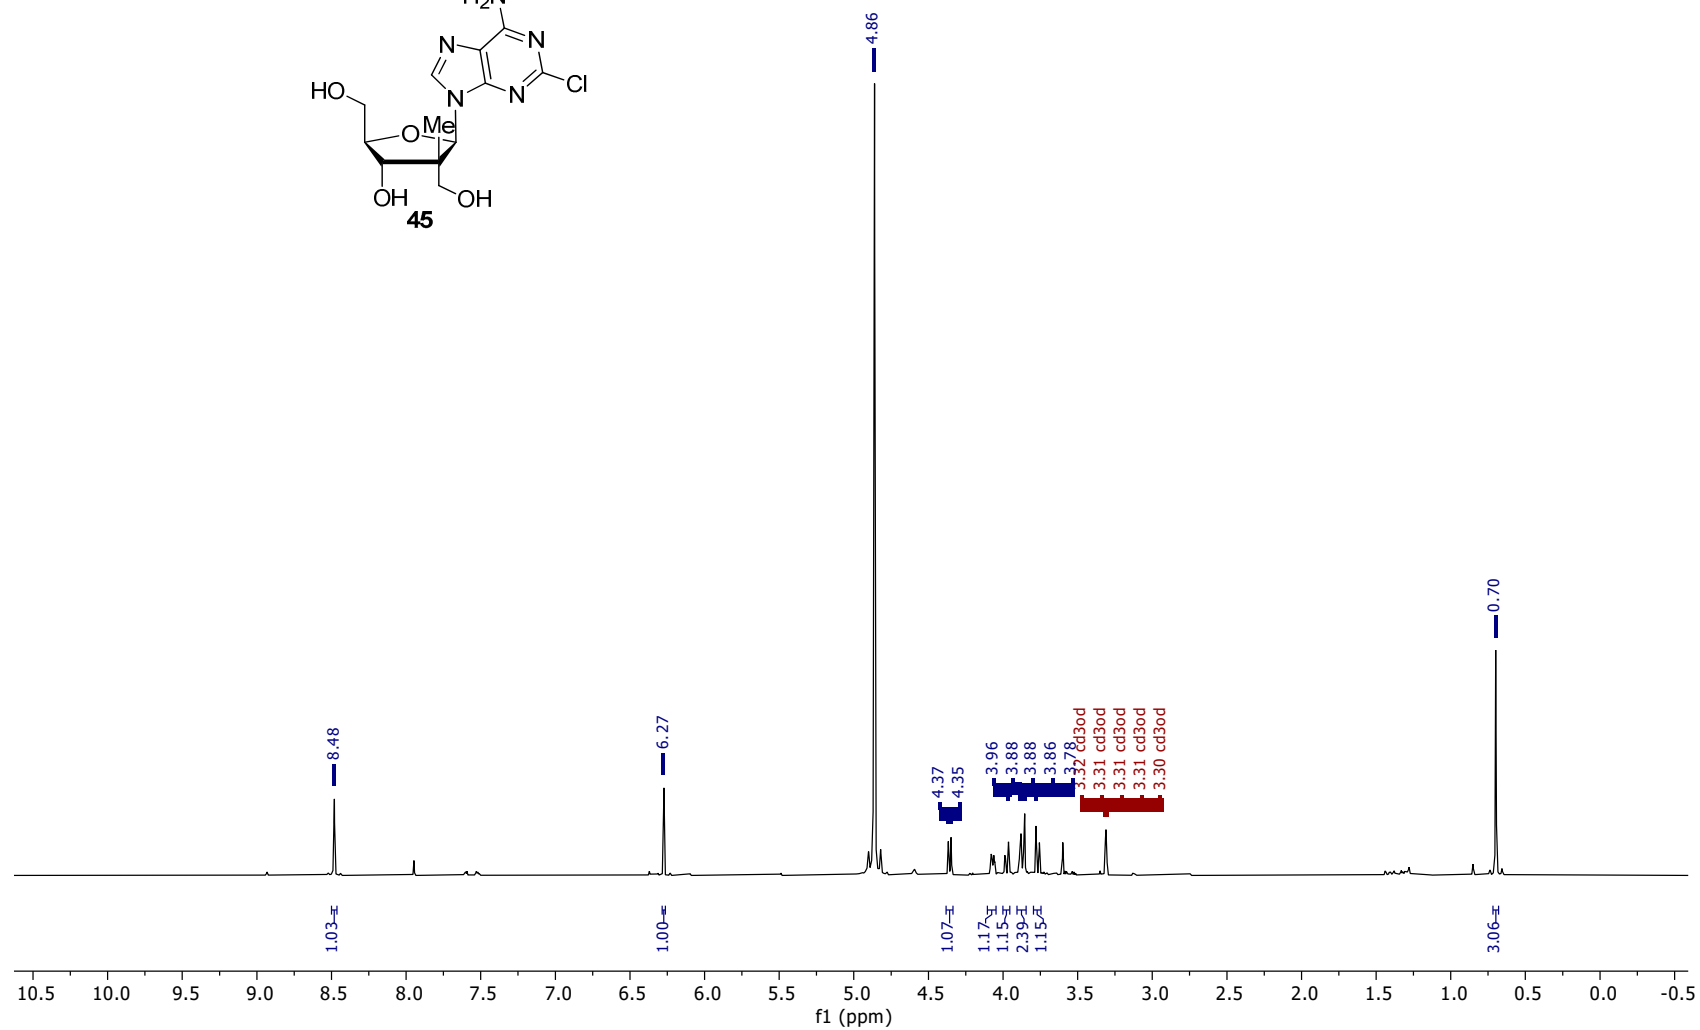

$^{13}\text{C}\{^1\text{H}\}$ -NMR (126 MHz,  $\text{CD}_3\text{OD}$ )

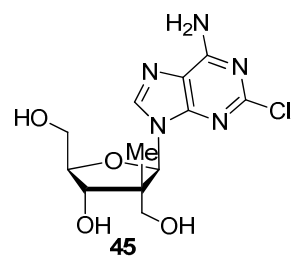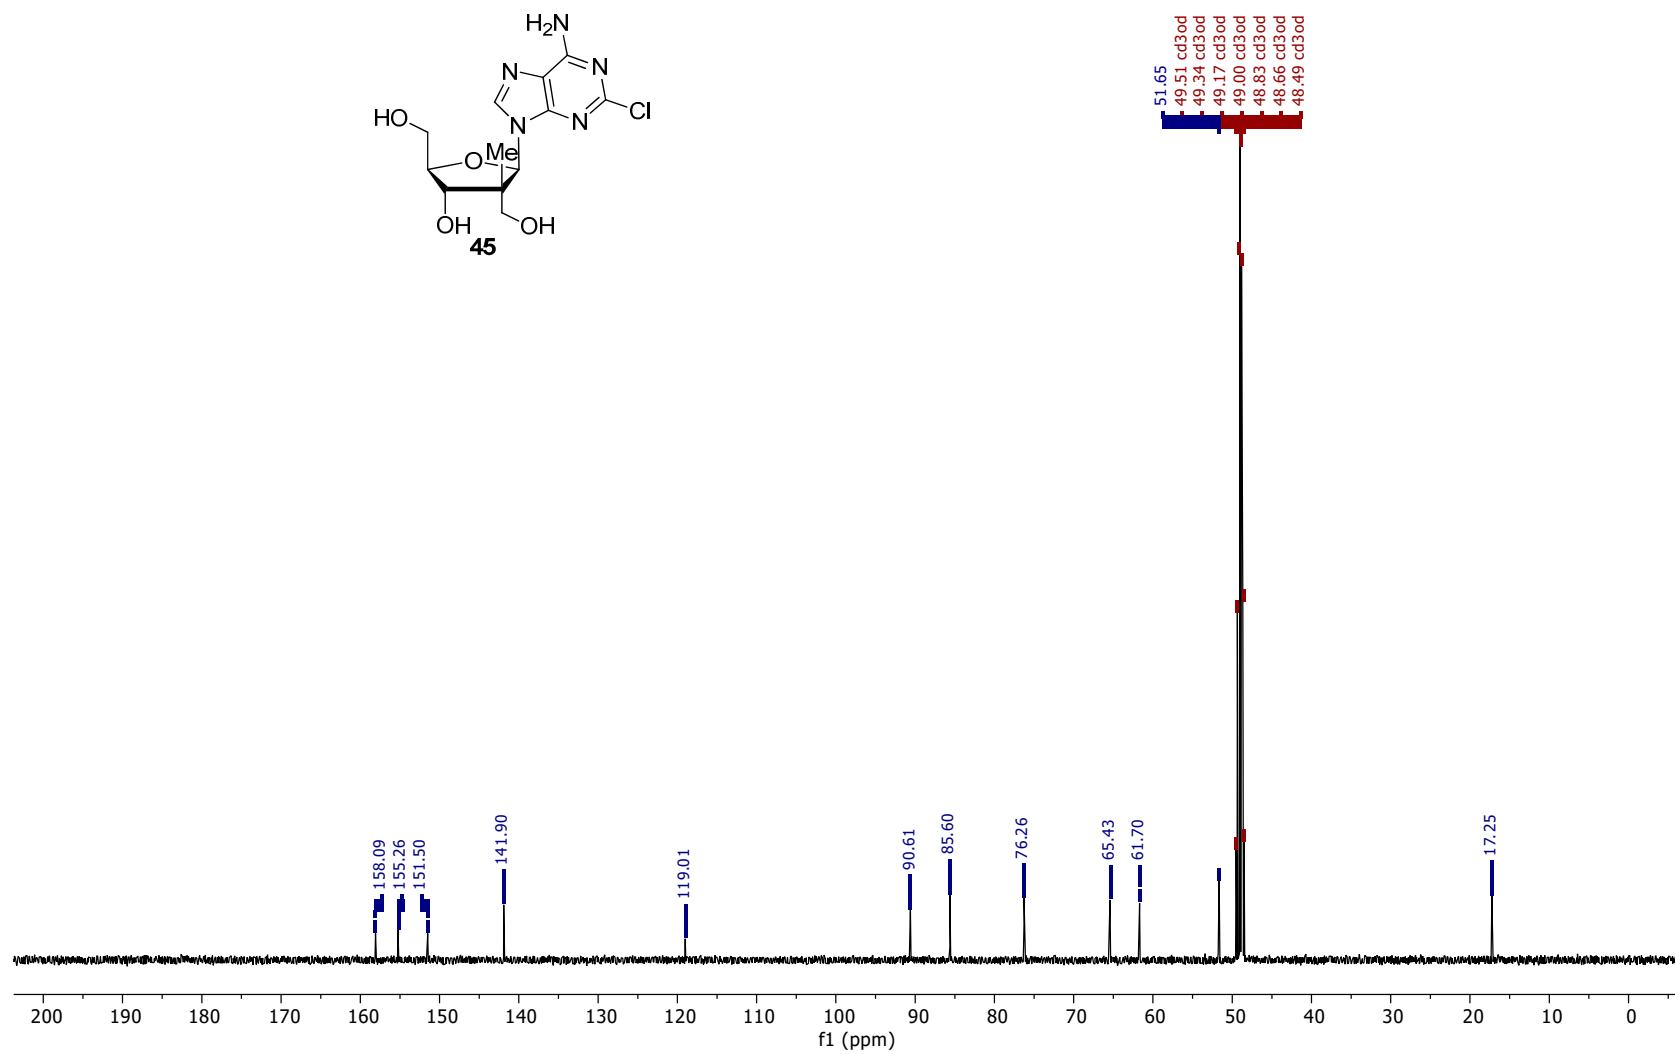



AM-ESP-873

 $^1\text{H}$ -NMR (500 MHz,  $\text{CD}_3\text{OD}$ )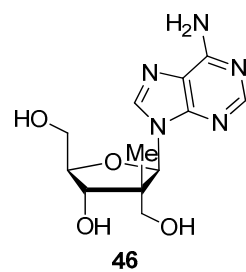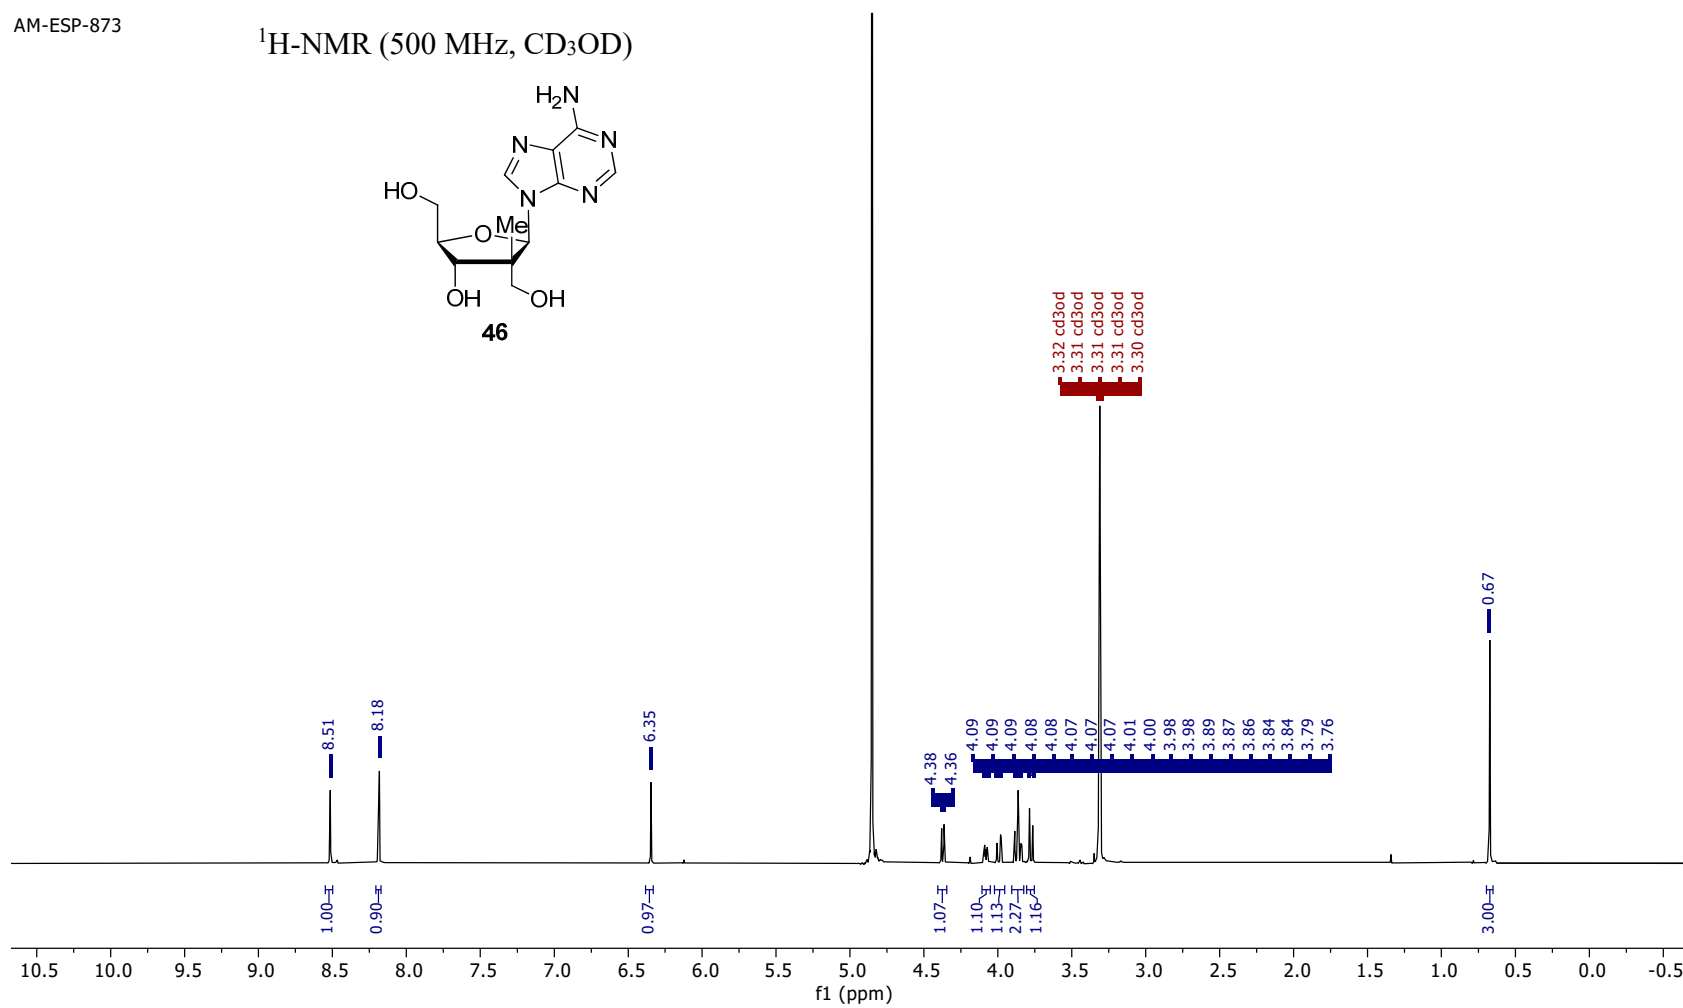

AM-ESP-880

 $^{13}\text{C}\{^1\text{H}\}$ -NMR (126 MHz,  $\text{CD}_3\text{OD}$ )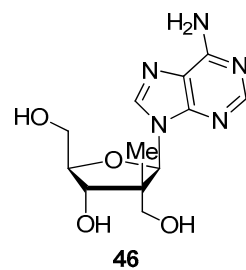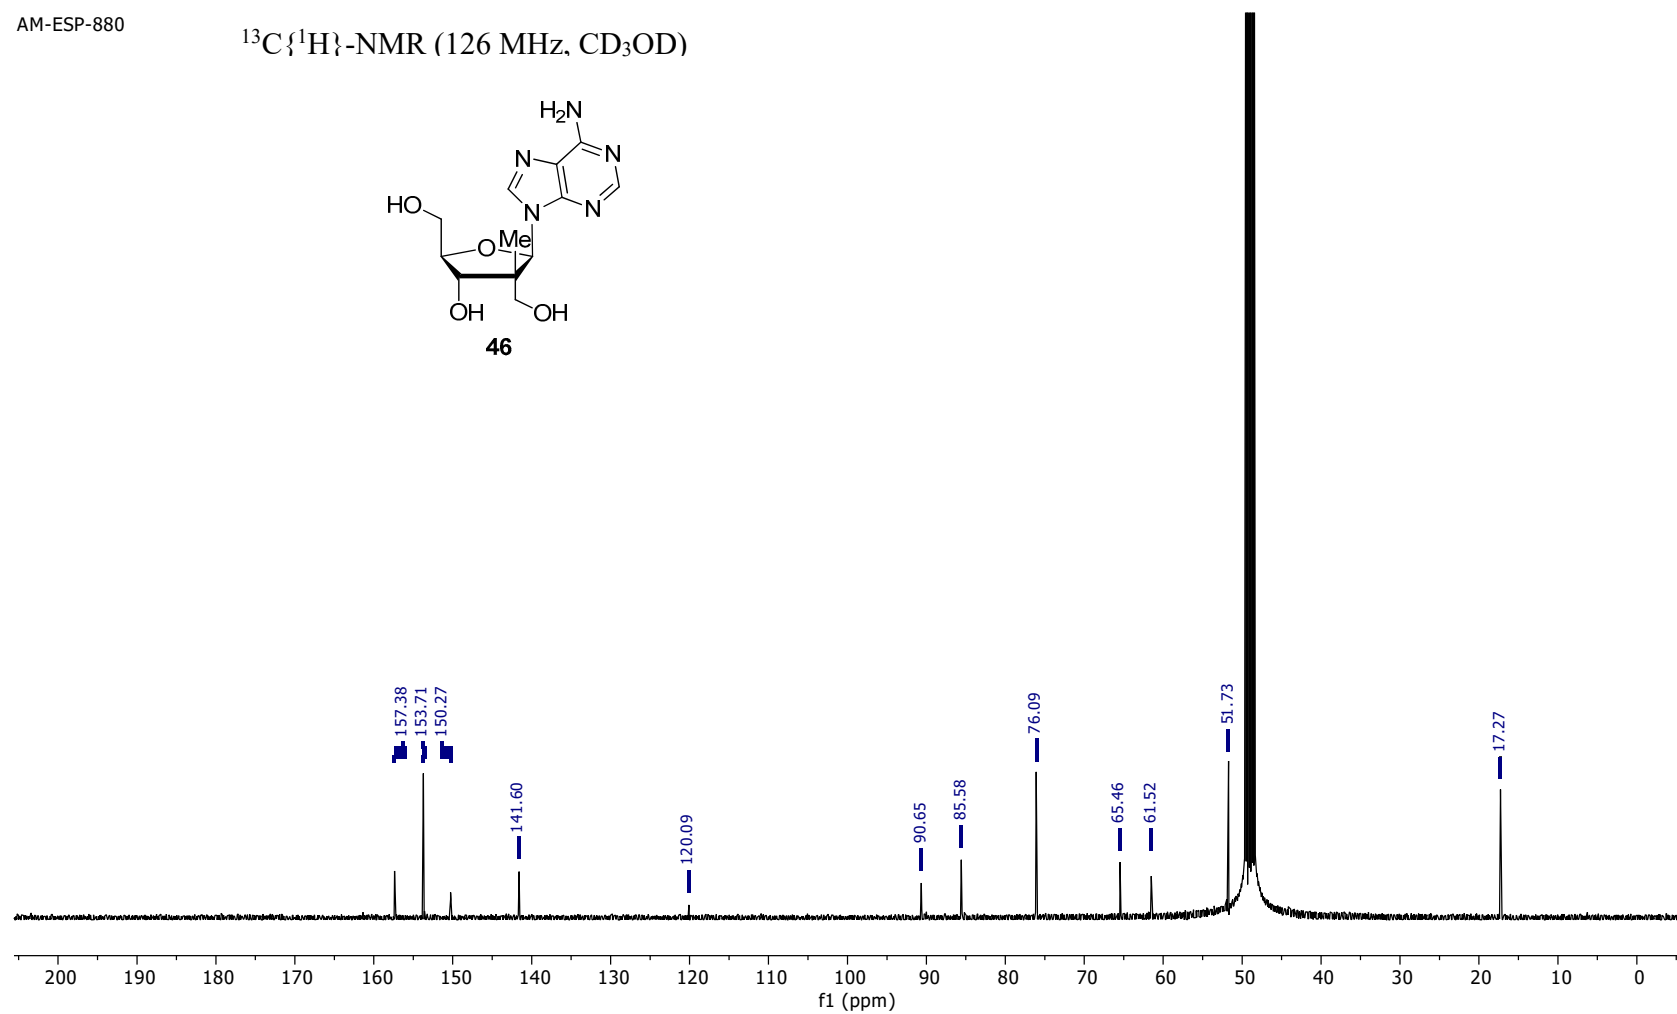

$^1\text{H}$ -NMR (500 MHz,  $\text{D}_2\text{O}$ )

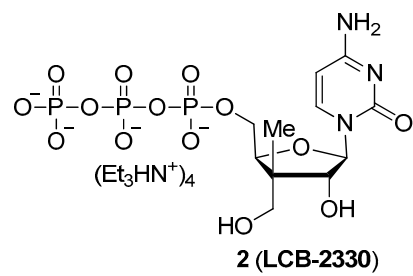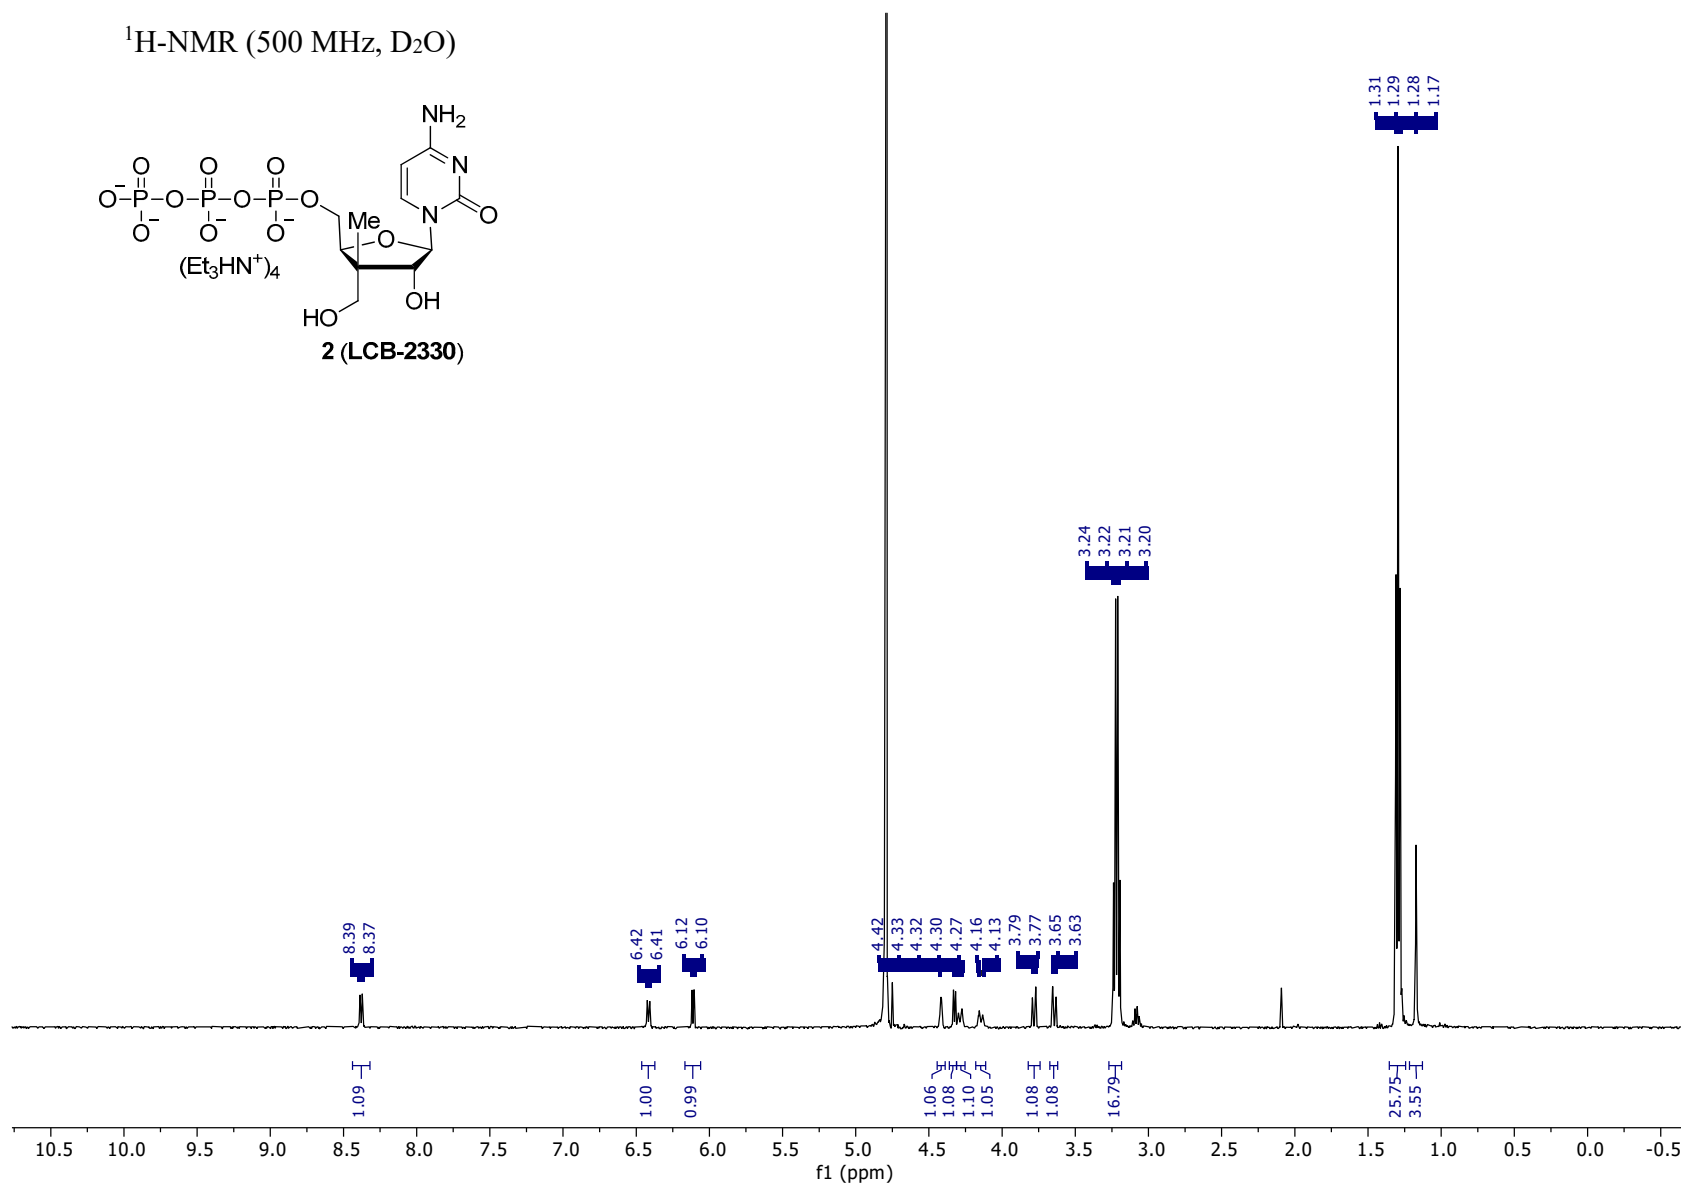

$^{13}\text{C}\{^1\text{H}\}$ -NMR (126 MHz,  $\text{D}_2\text{O}$ )

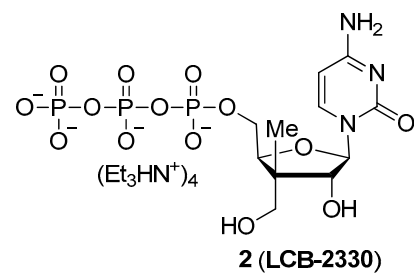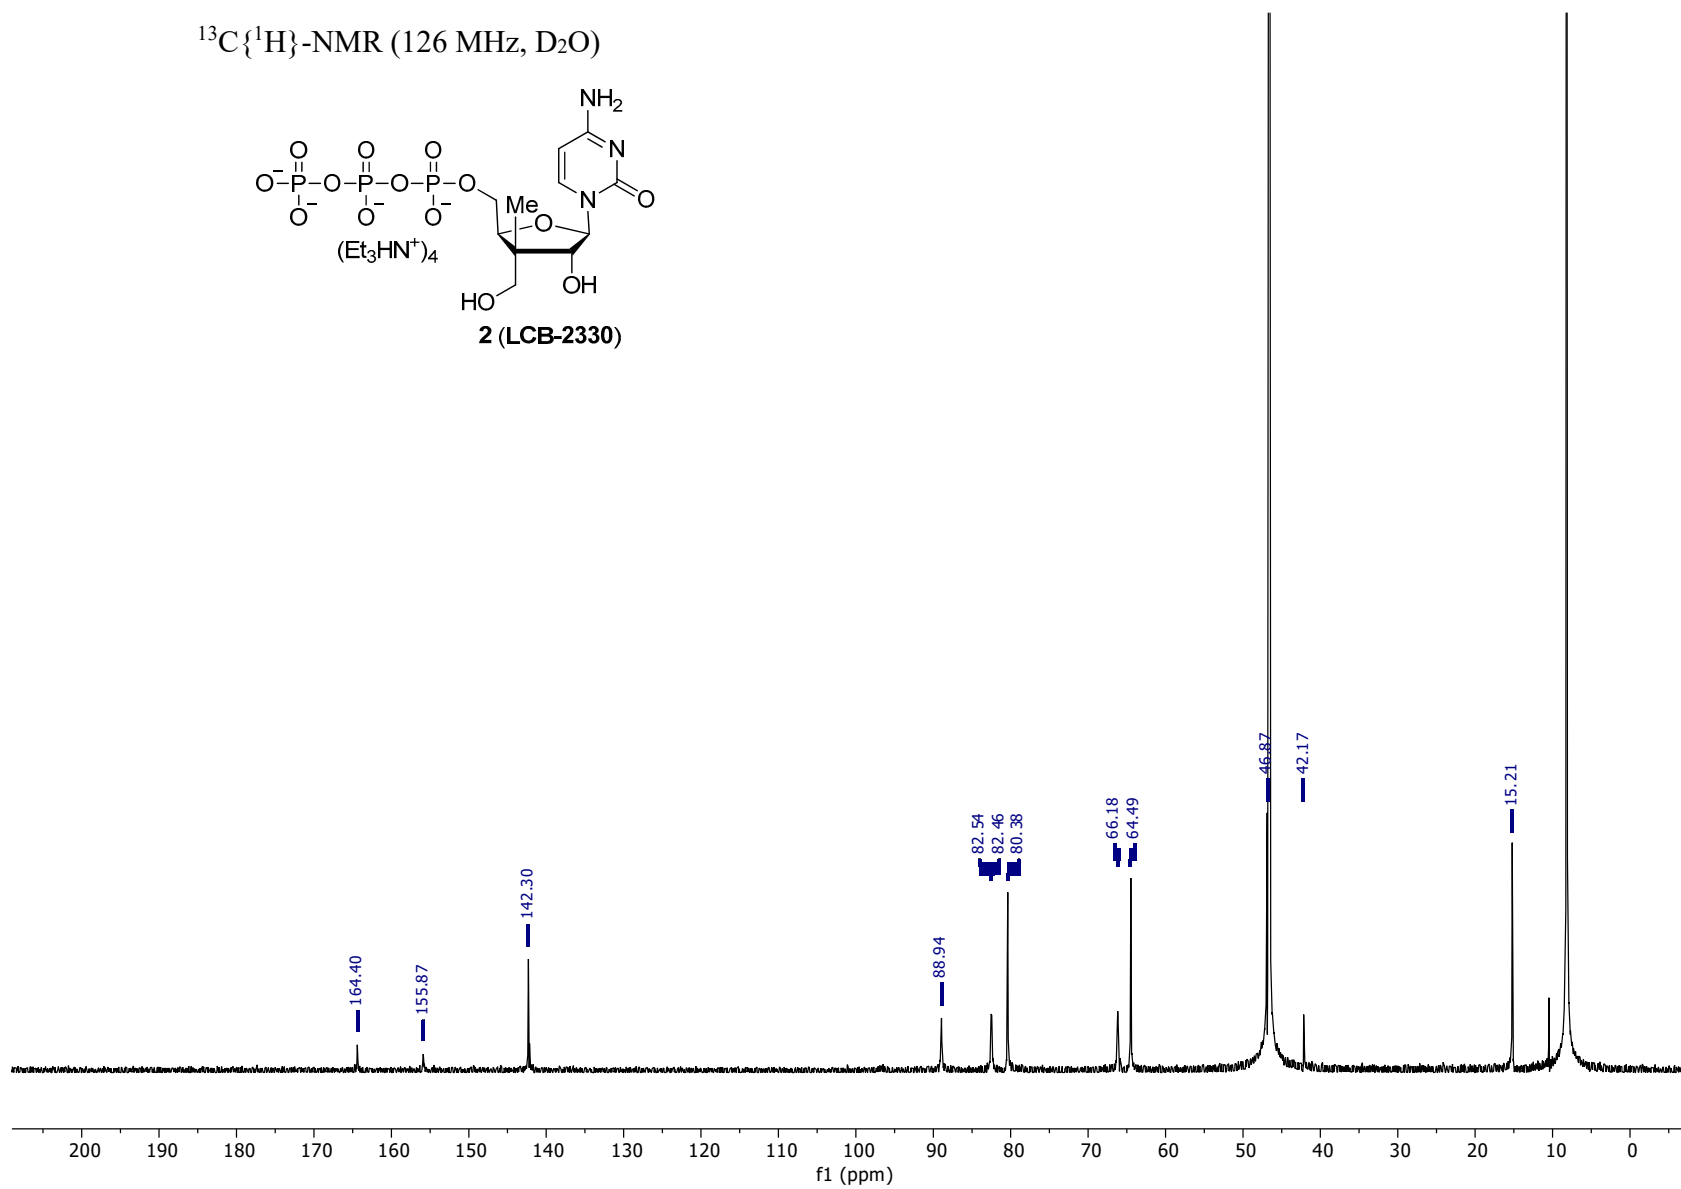

$^{31}\text{P}$ NMR (162 MHz,  $\text{D}_2\text{O}$ )

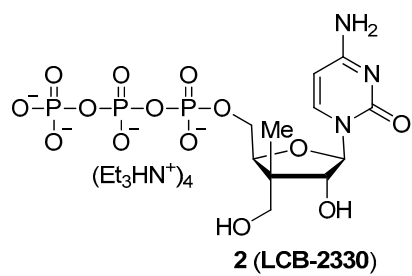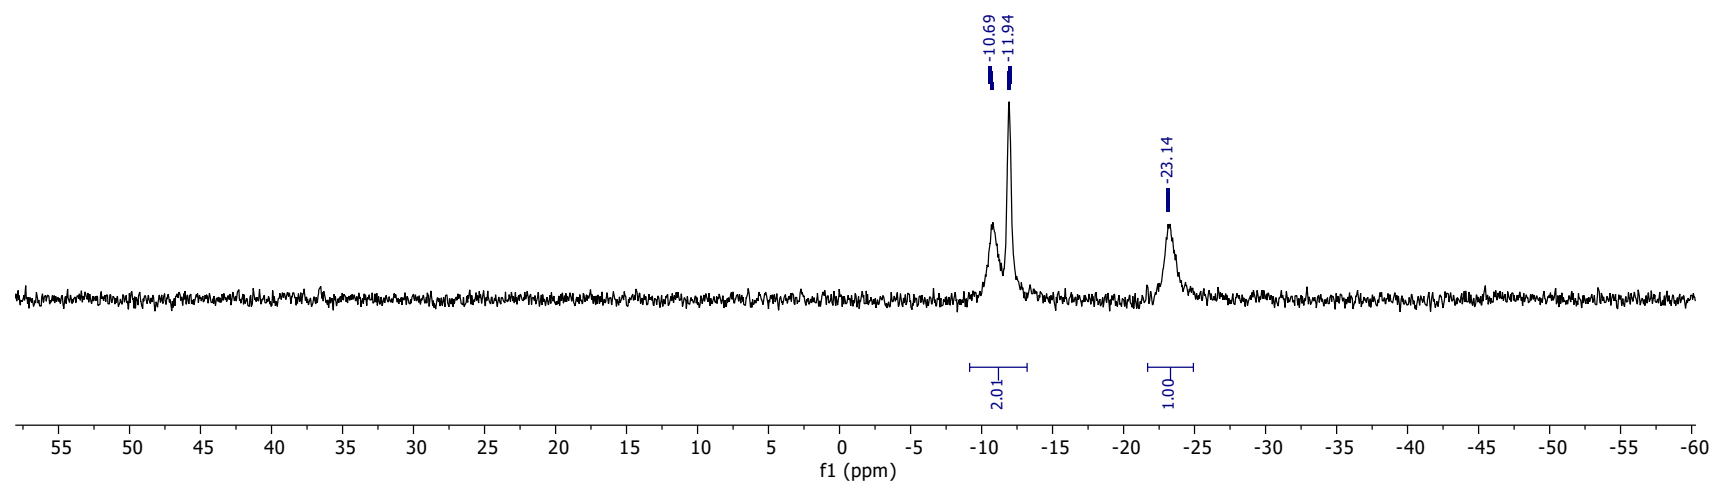

<sup>1</sup>H-NMR (500 MHz, D<sub>2</sub>O)

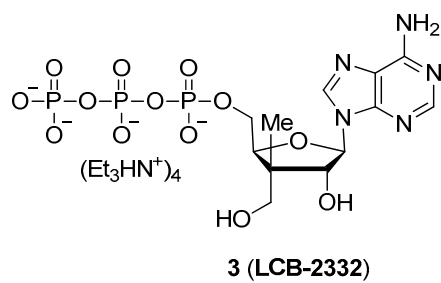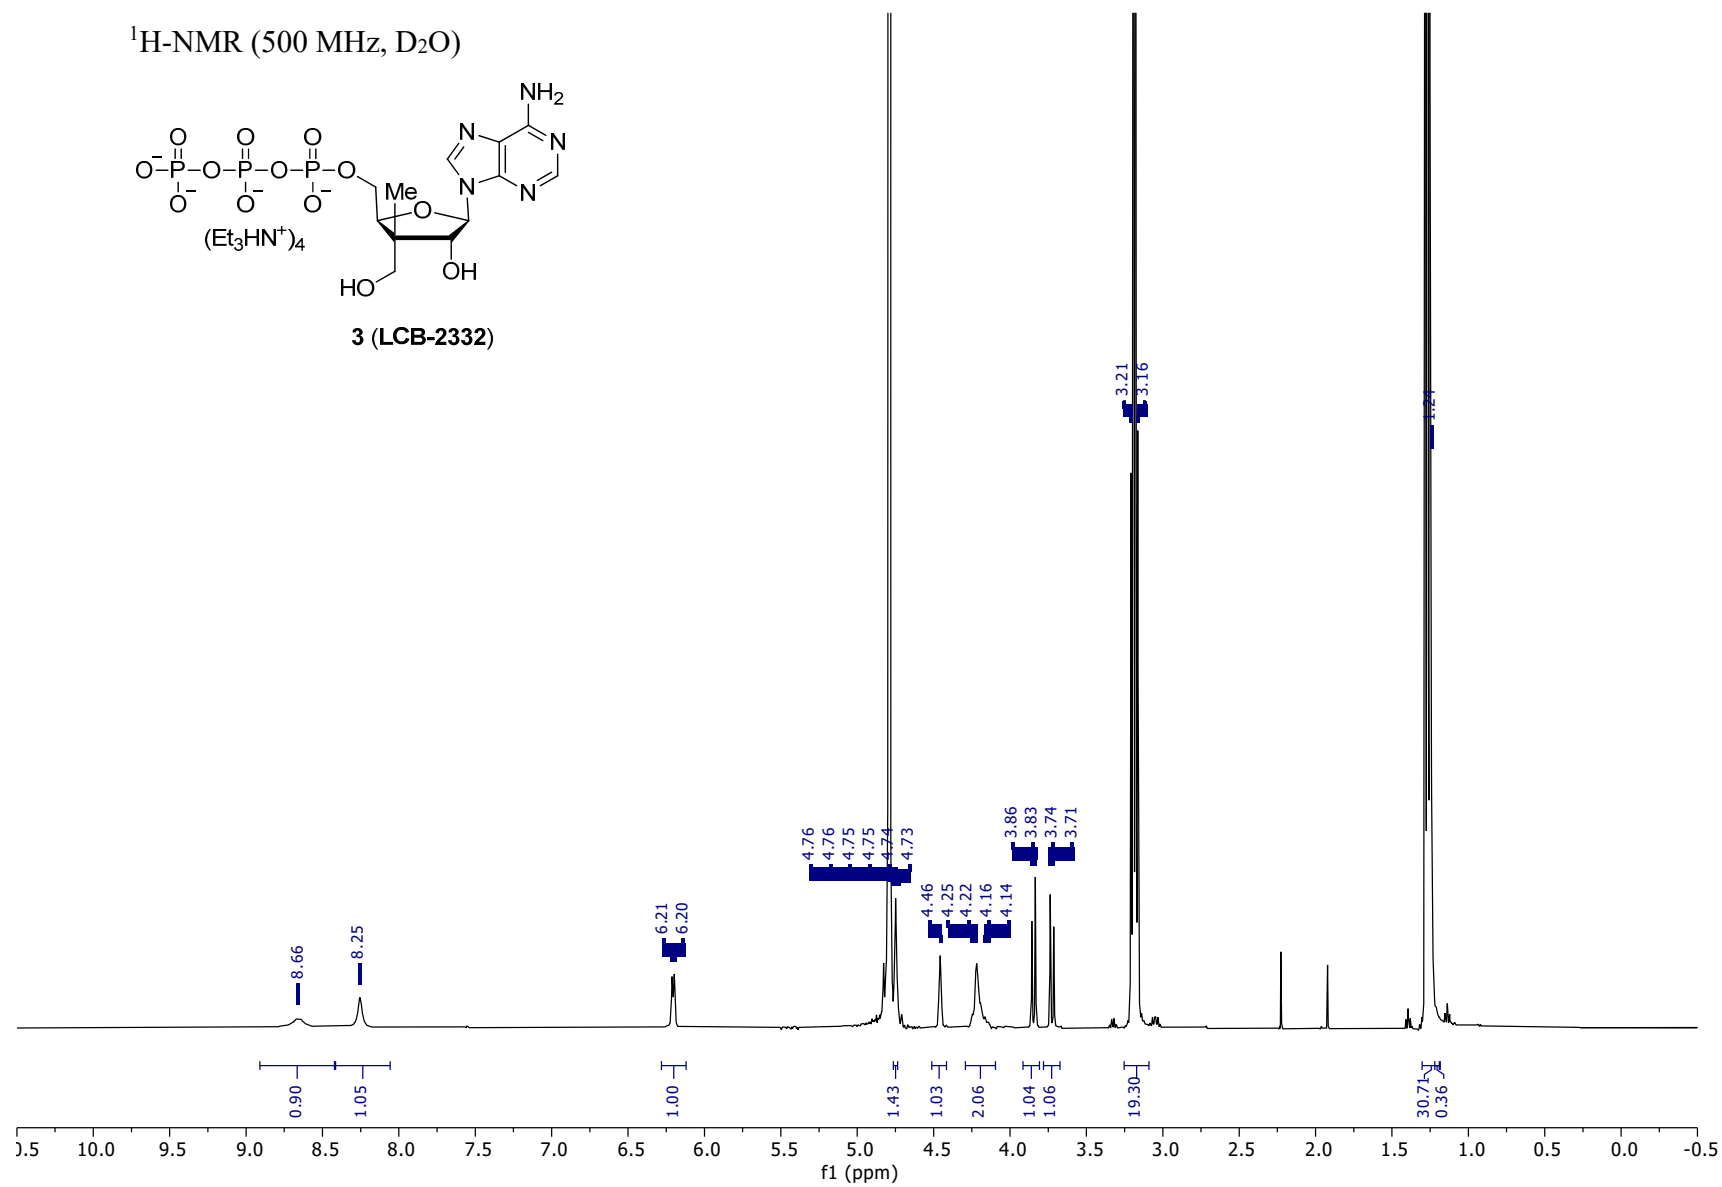

$^{13}\text{C}\{^1\text{H}\}$ -NMR (176 MHz,  $\text{D}_2\text{O}$ )

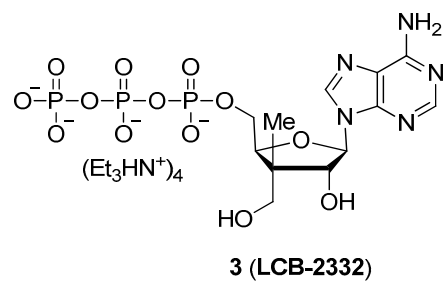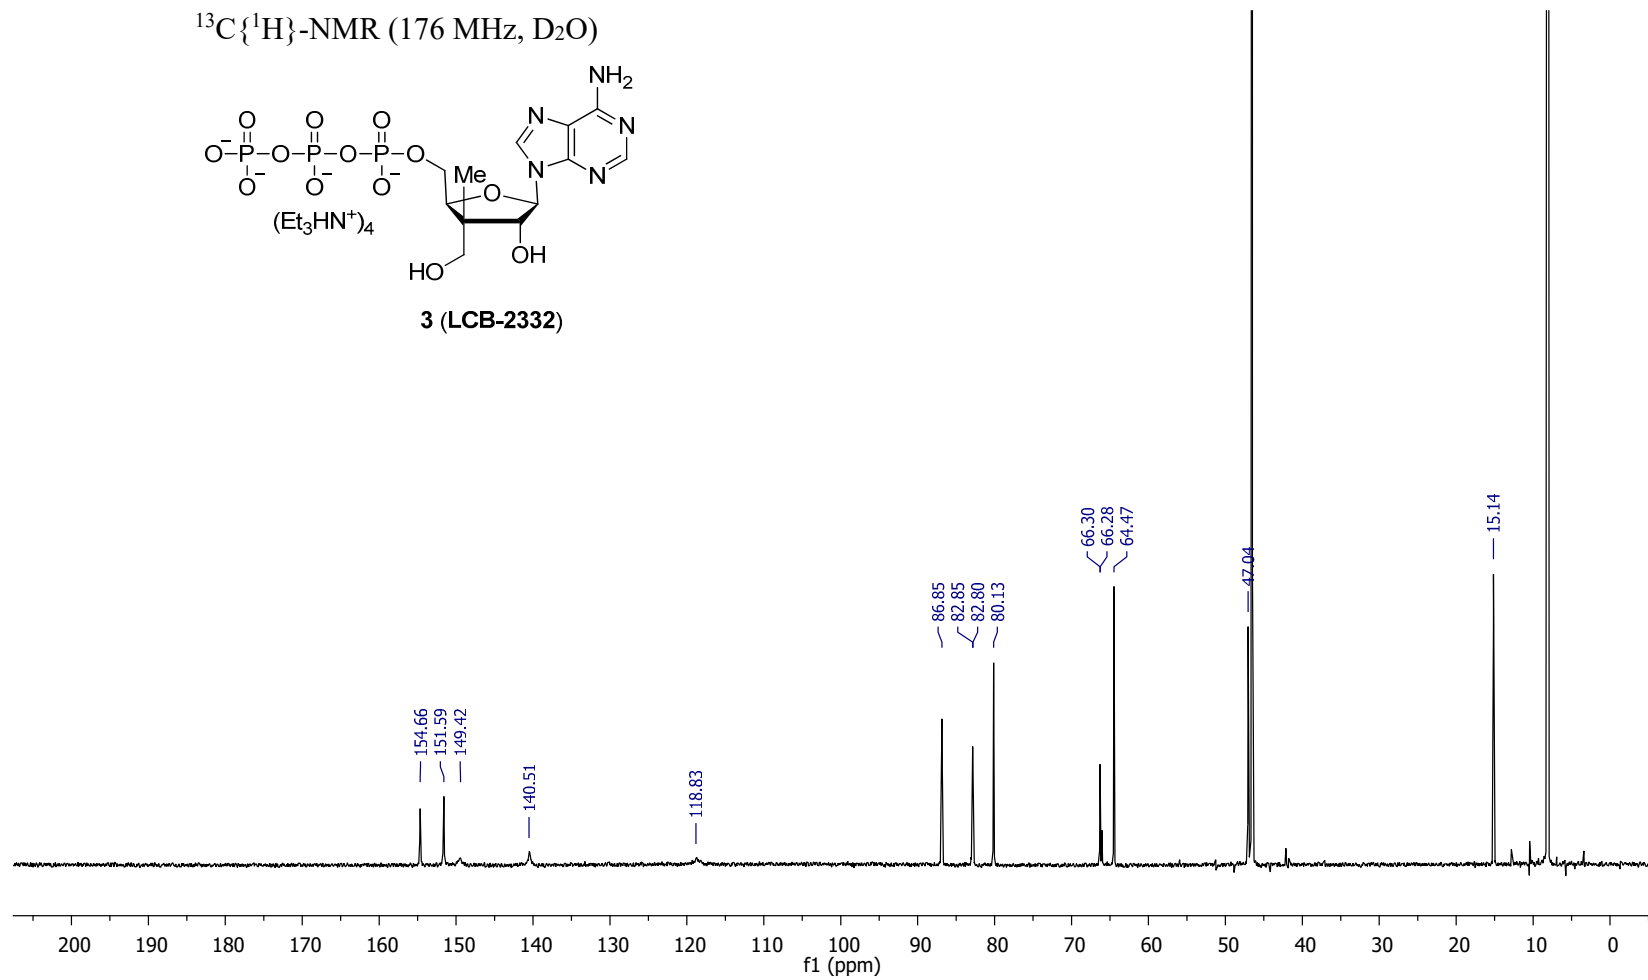

$^{31}\text{P}$  NMR (162 MHz,  $\text{D}_2\text{O}$ )

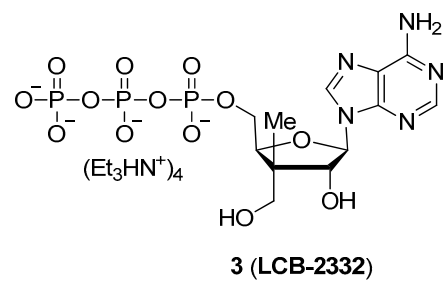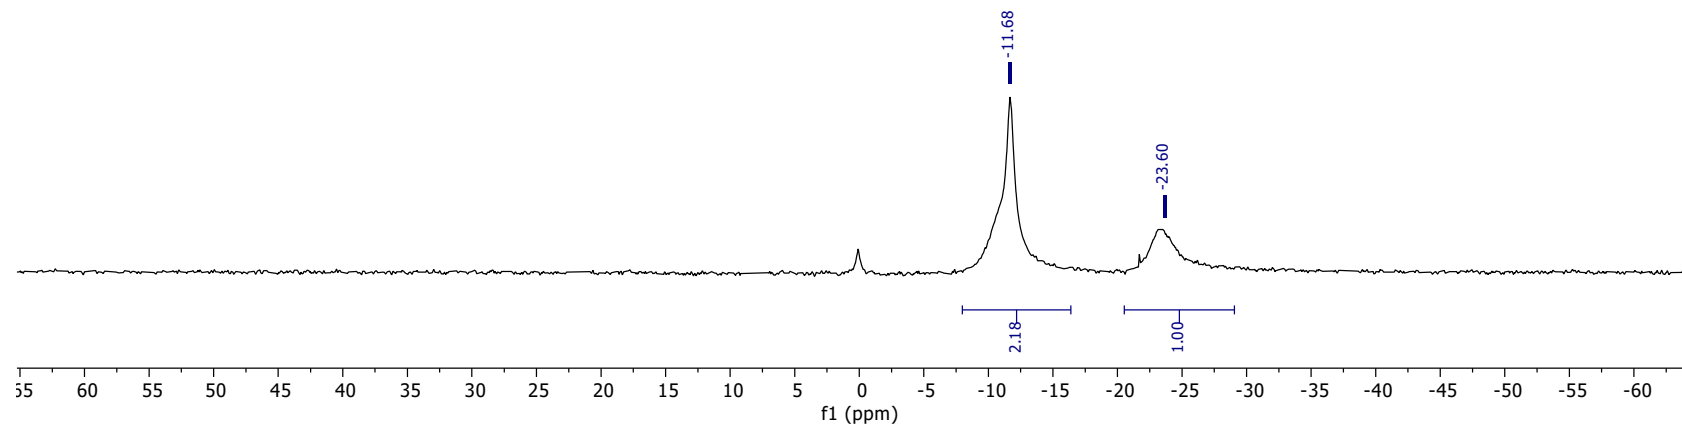



AM-ESP-765

 $^1\text{H}$ -NMR (500 MHz,  $\text{D}_2\text{O}$ )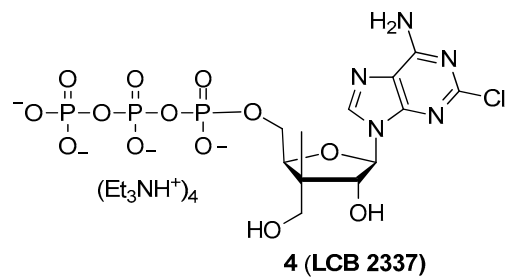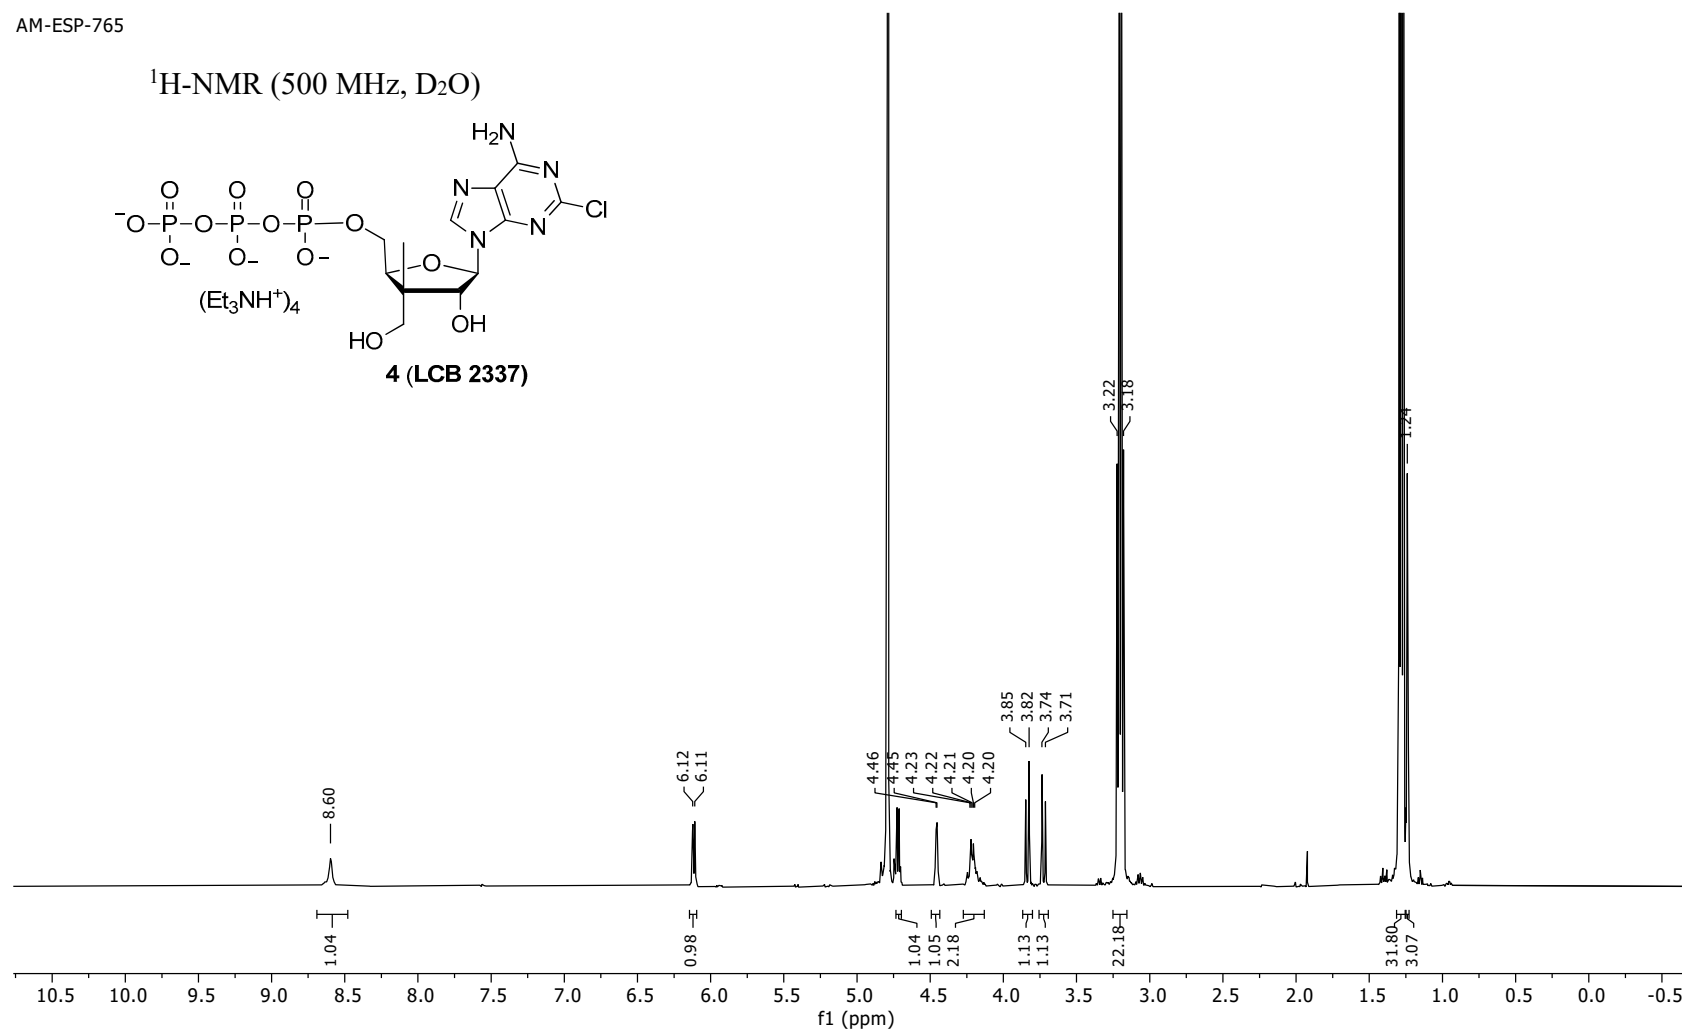

AM-ESP-765

 $^{13}\text{C}\{^1\text{H}\}$ -NMR (126 MHz,  $\text{D}_2\text{O}$ )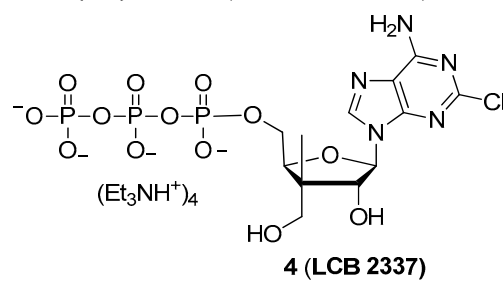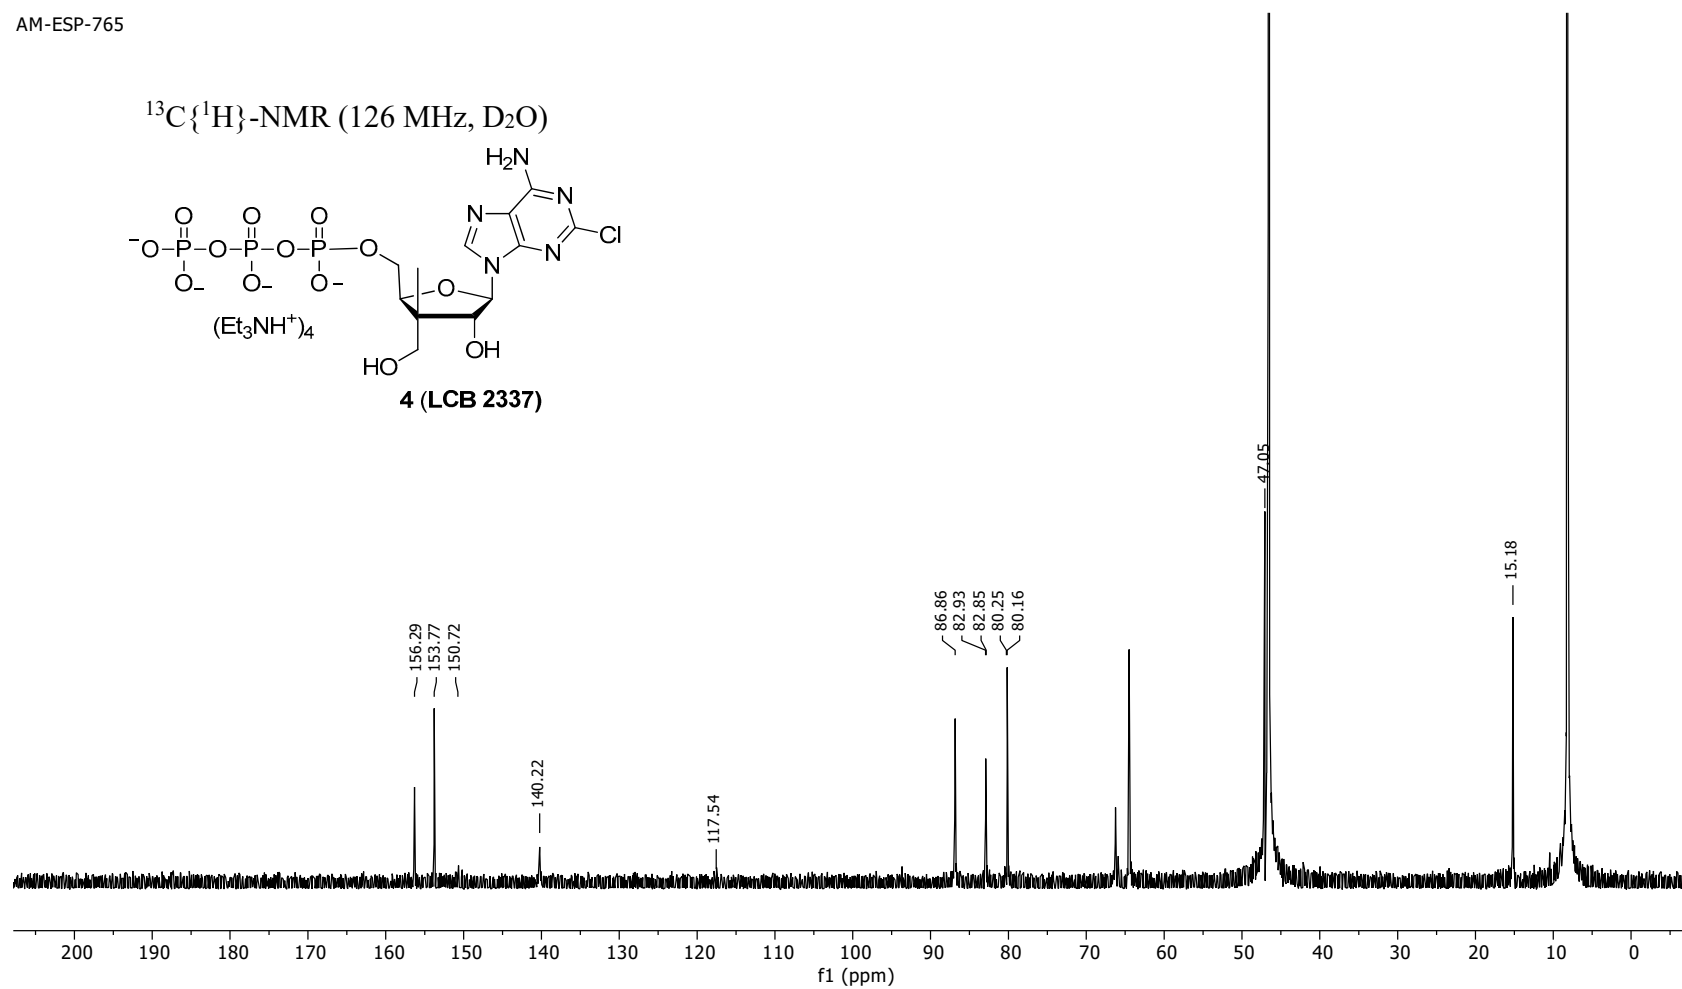

AM-E3P-765

 $^{31}\text{P}$ -NMR (162 MHz,  $\text{D}_2\text{O}$ )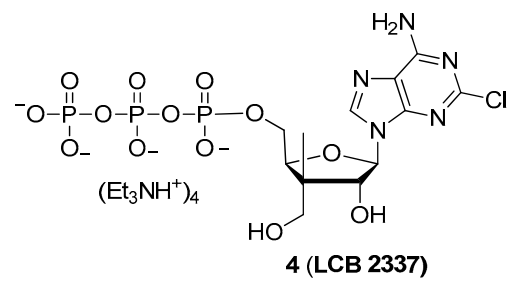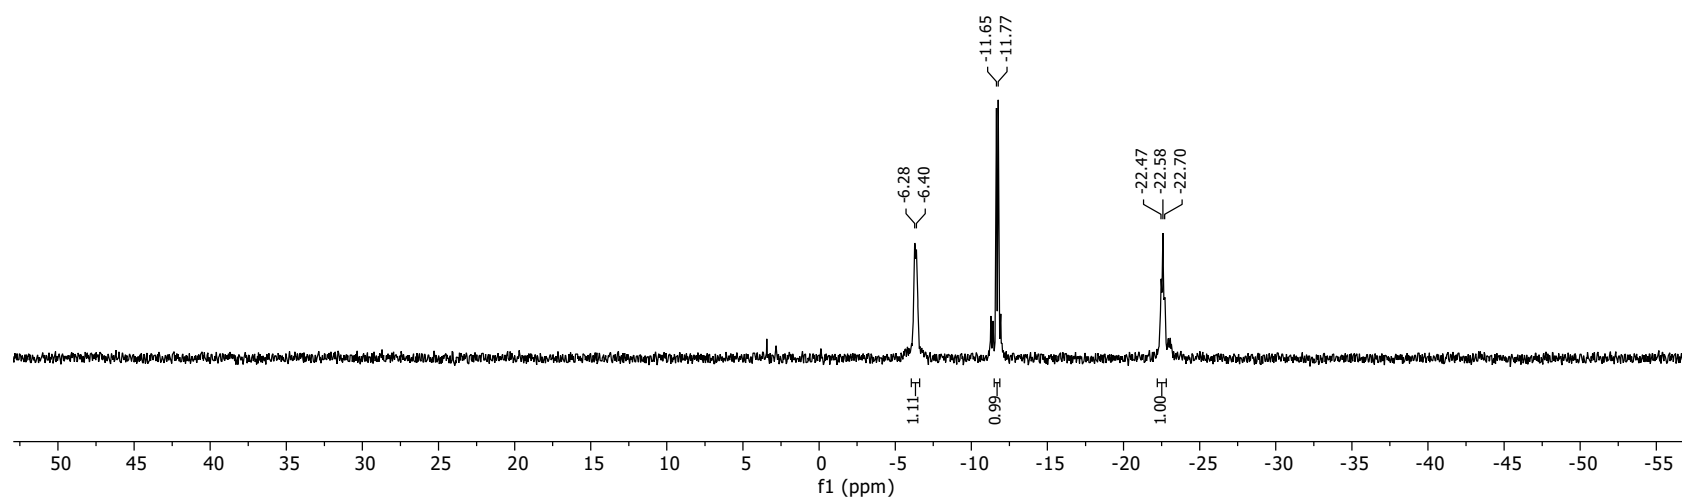

AM-ESP-327

 $^1\text{H}$ -NMR (700 MHz,  $\text{D}_2\text{O}$ )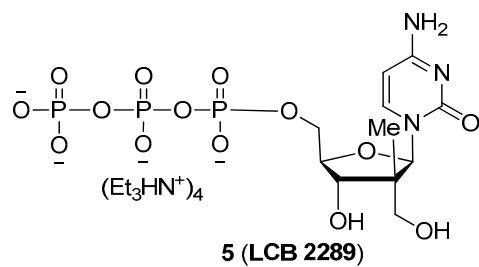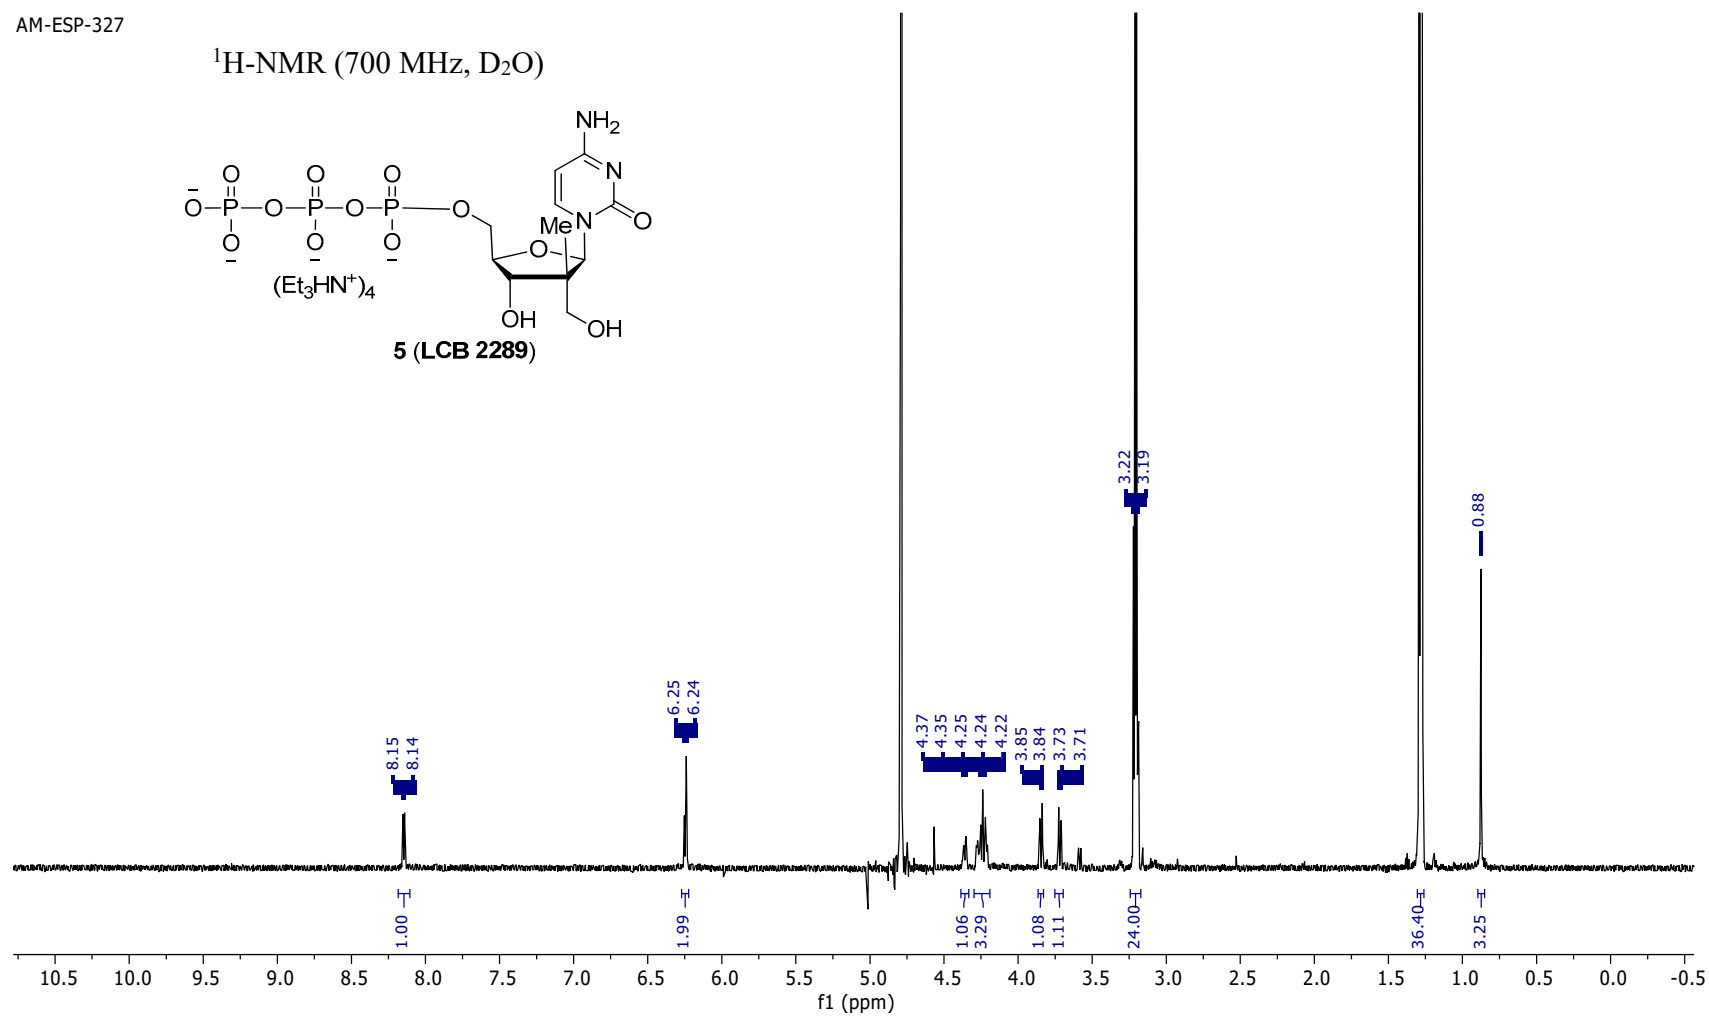

AM-ESP-327

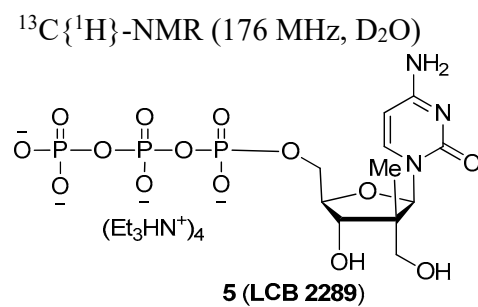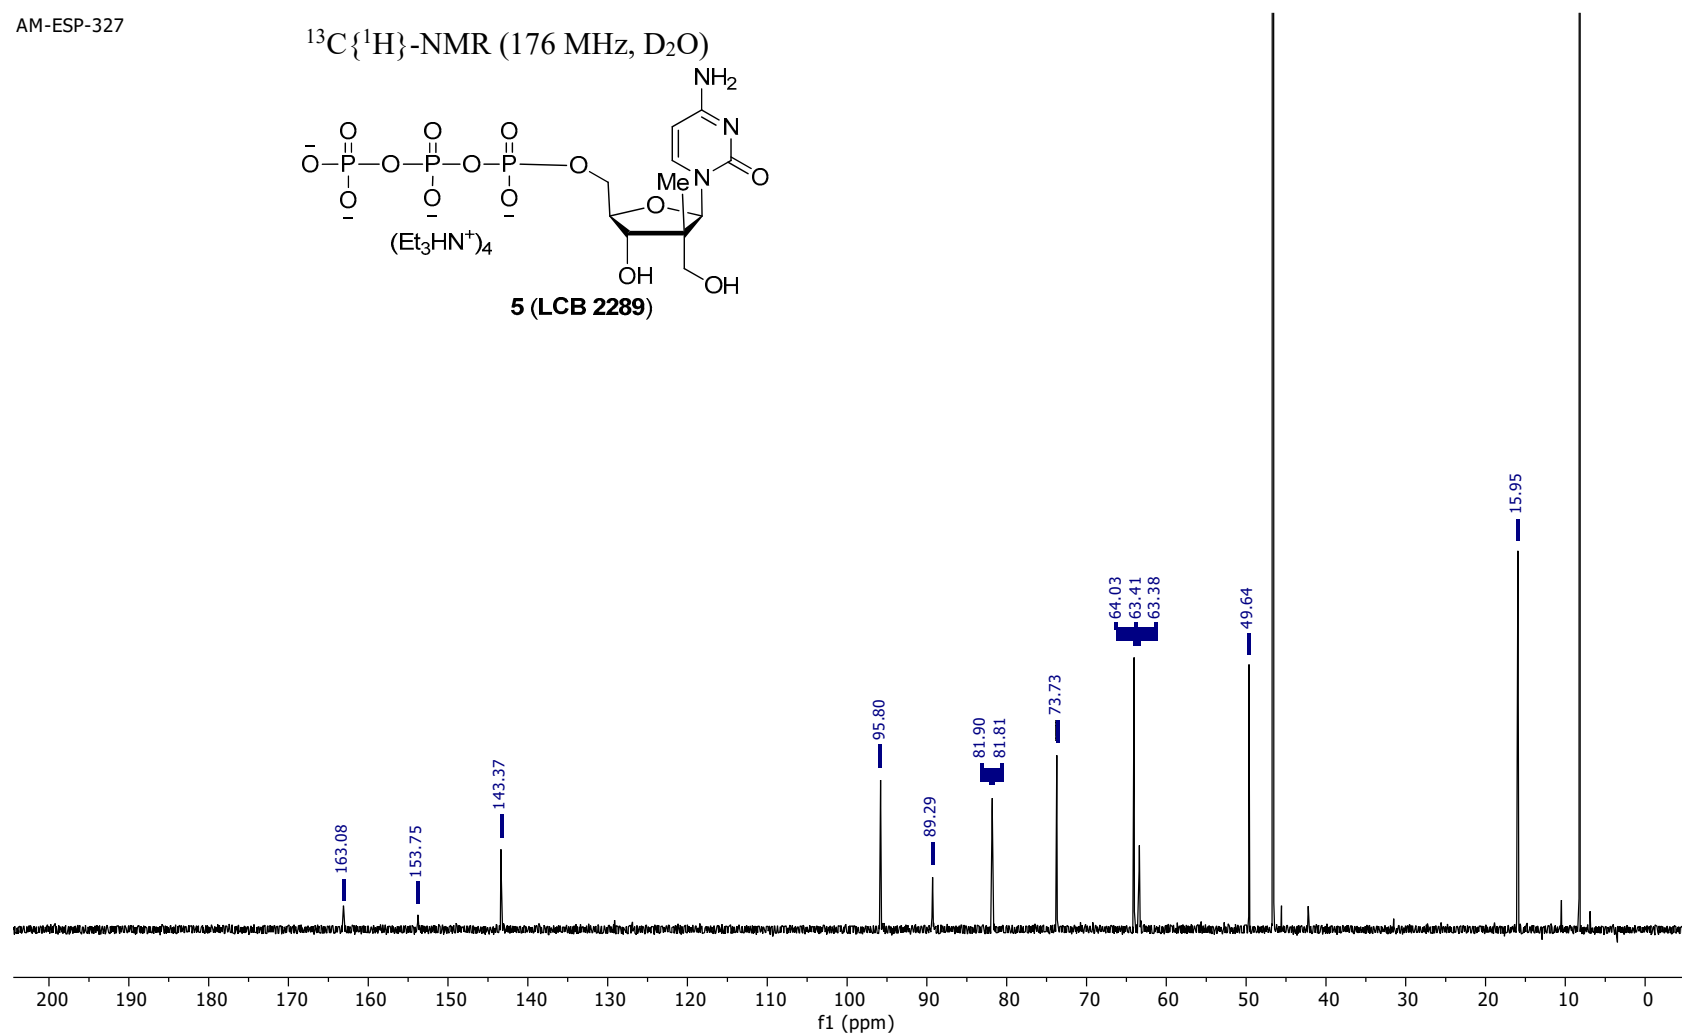

AM-ESP-327

 $^{31}\text{P}$ -NMR (162 MHz,  $\text{D}_2\text{O}$ )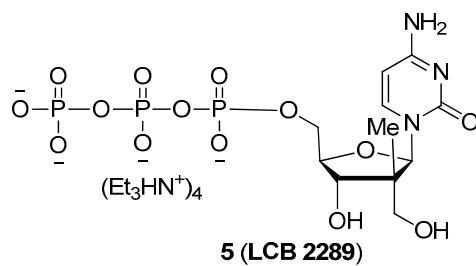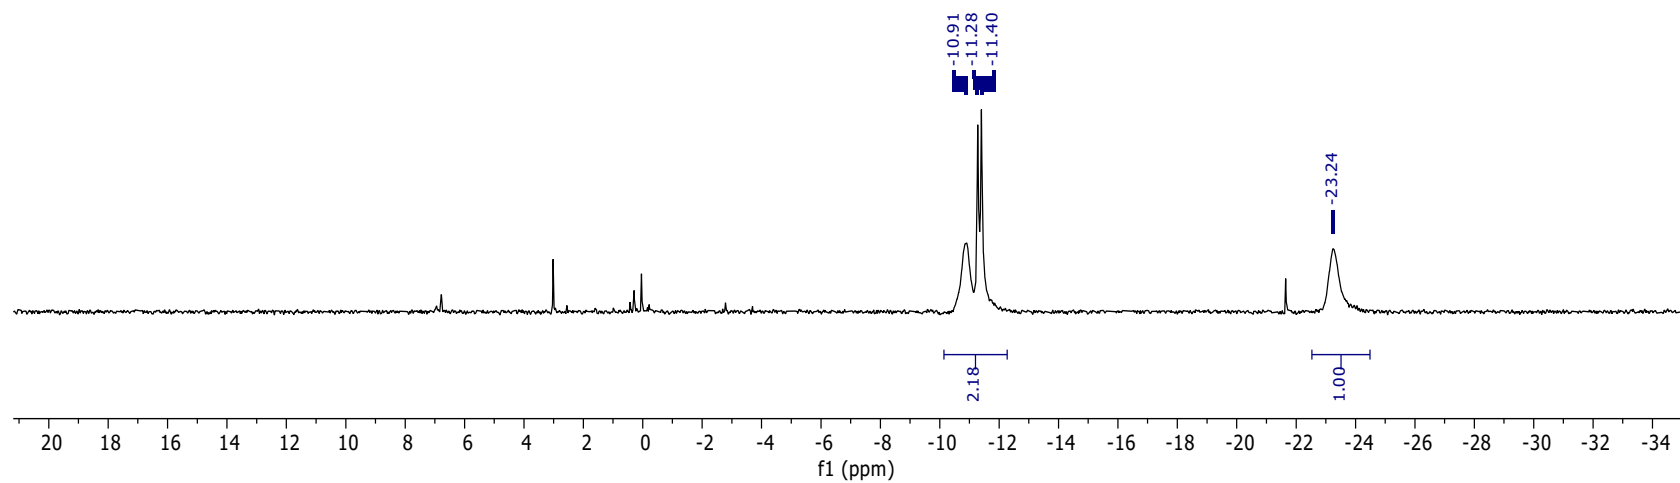

AM-ESP-1011

 $^1\text{H}$ -NMR (500 MHz,  $\text{D}_2\text{O}$ )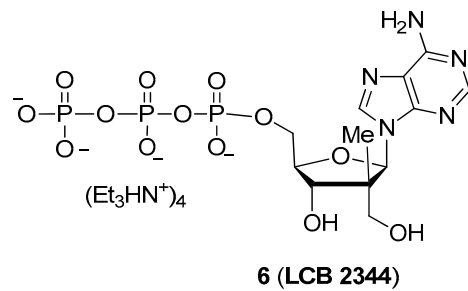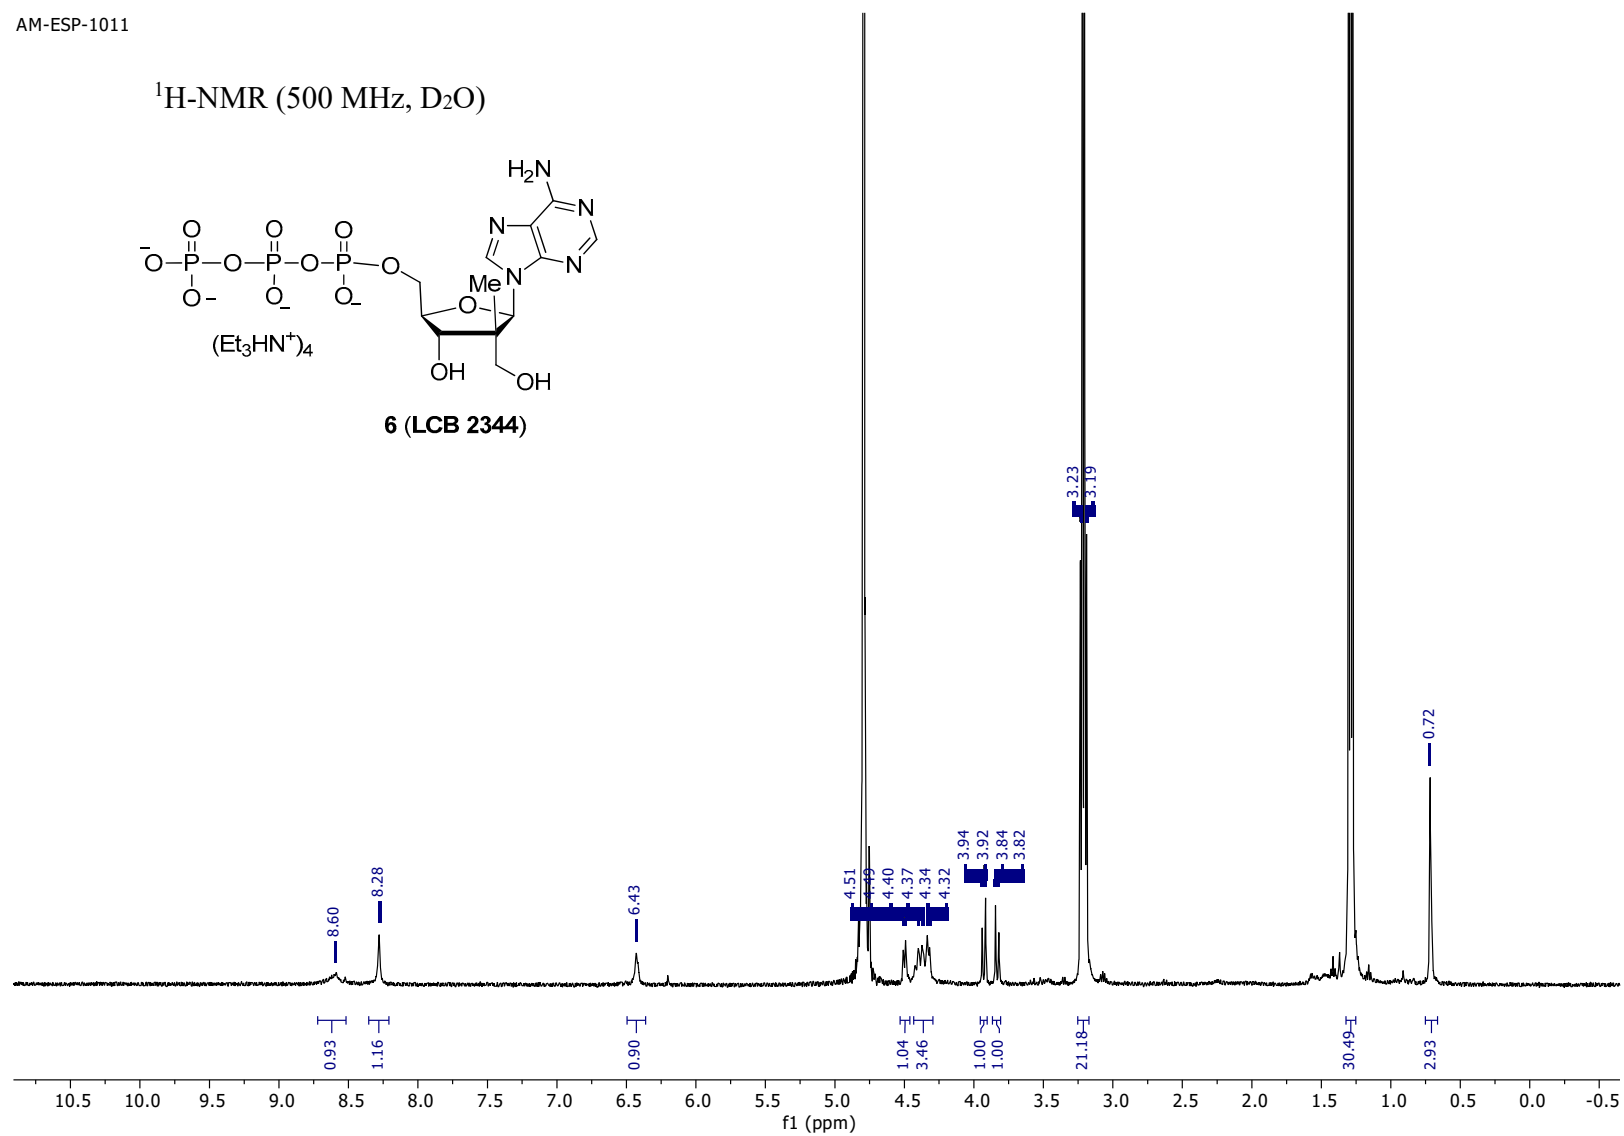

AM-ESP-875

 $^{13}\text{C}\{^1\text{H}\}$ -NMR (176 MHz,  $\text{D}_2\text{O}$ )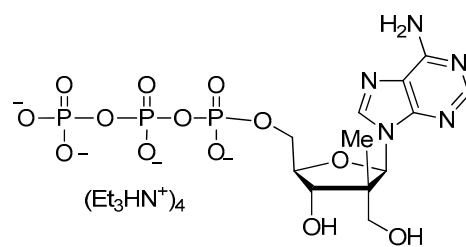**6 (LCB 2344)**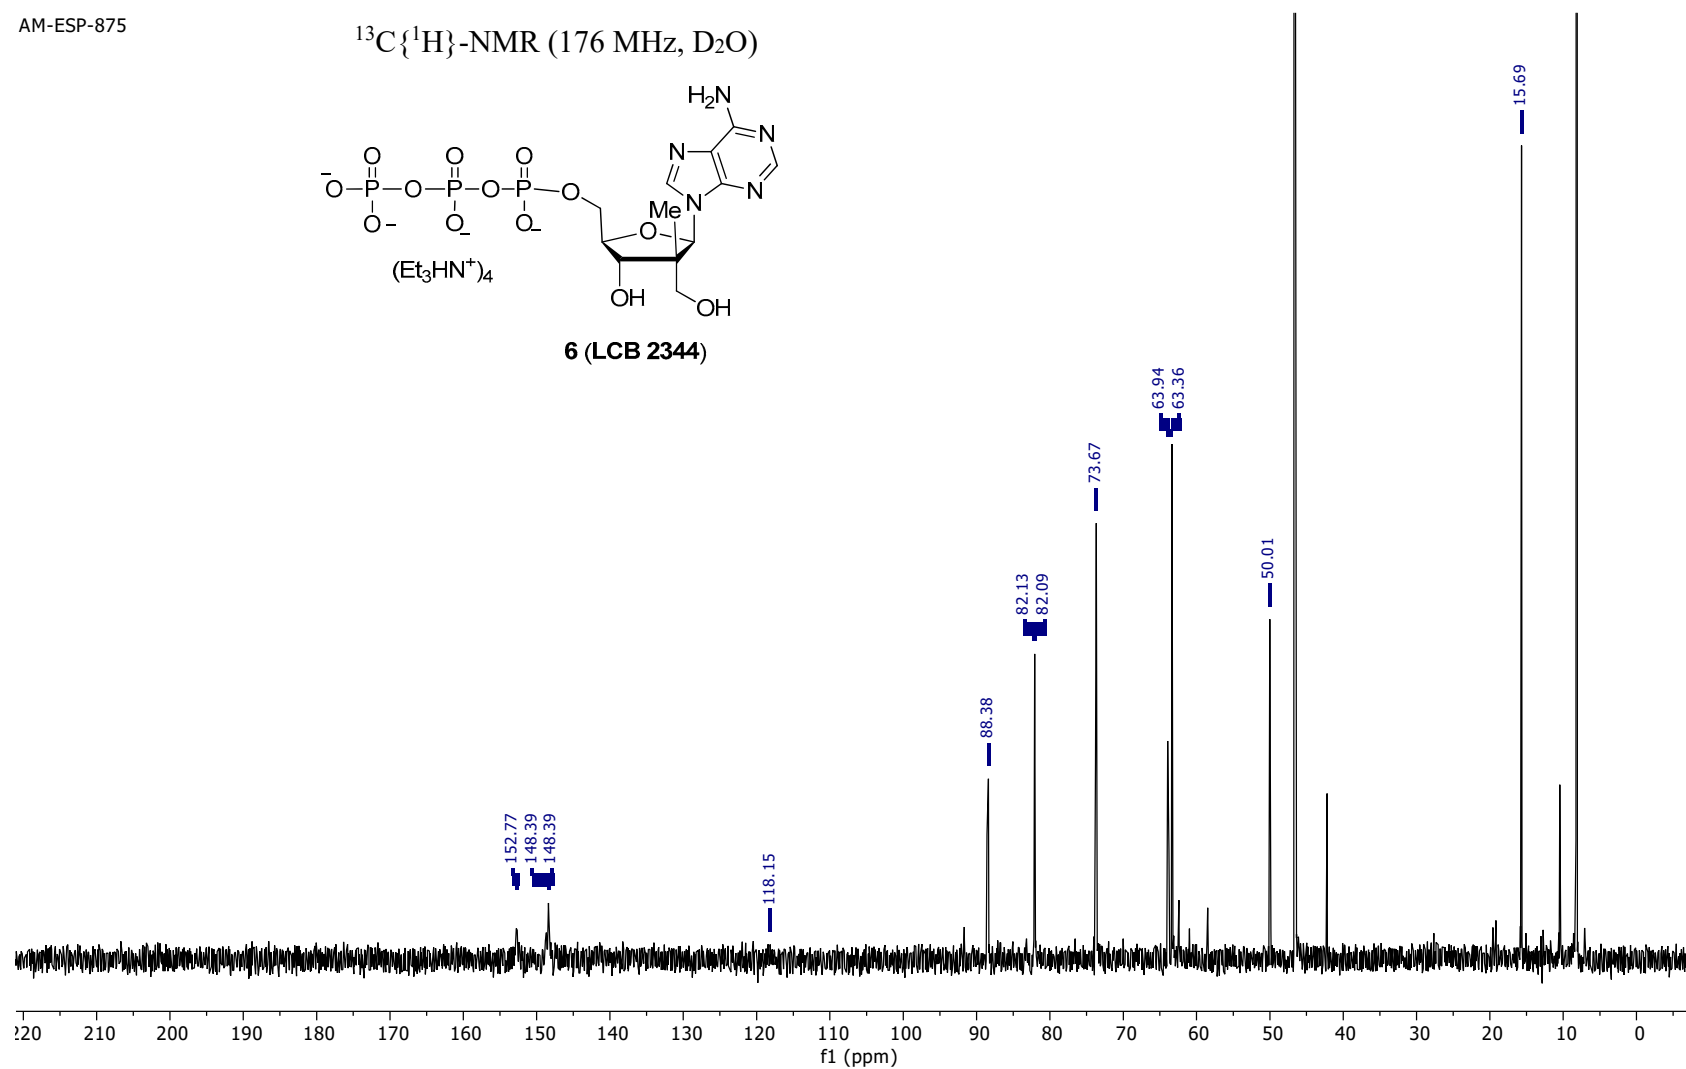



AM-ESP-878

 $^{31}\text{P}$ -NMR (162 MHz,  $\text{D}_2\text{O}$ )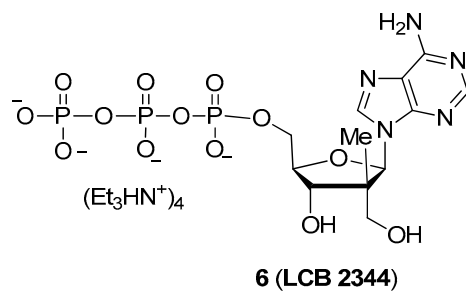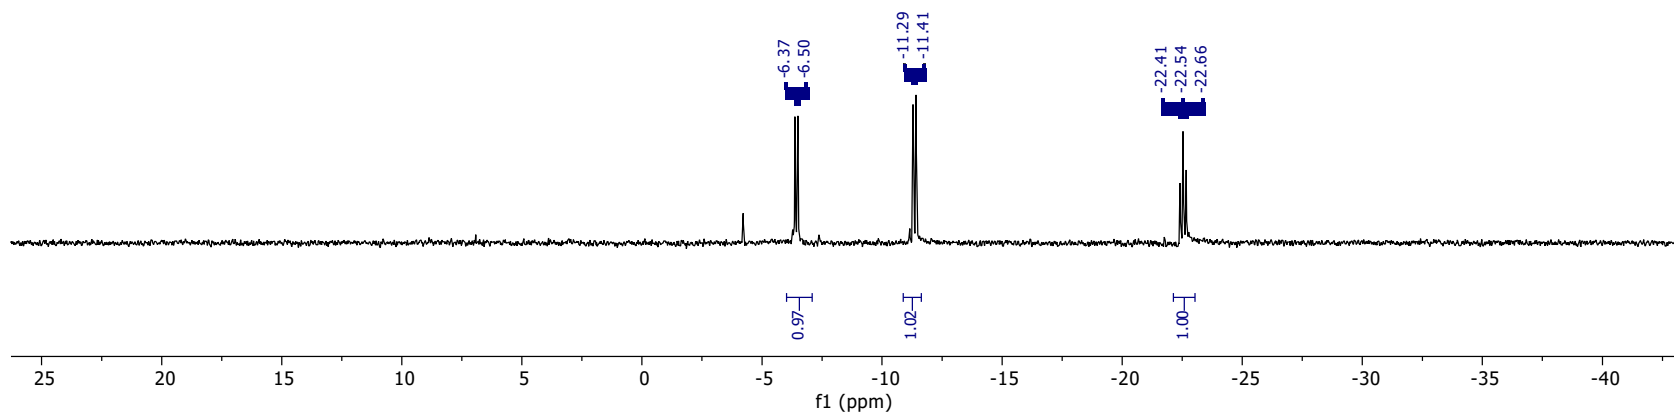

AM-ESP-854

 $^1\text{H}$ -NMR (700 MHz,  $\text{D}_2\text{O}$ )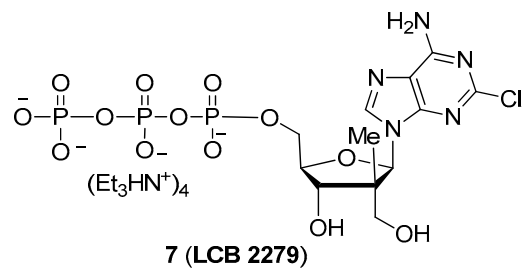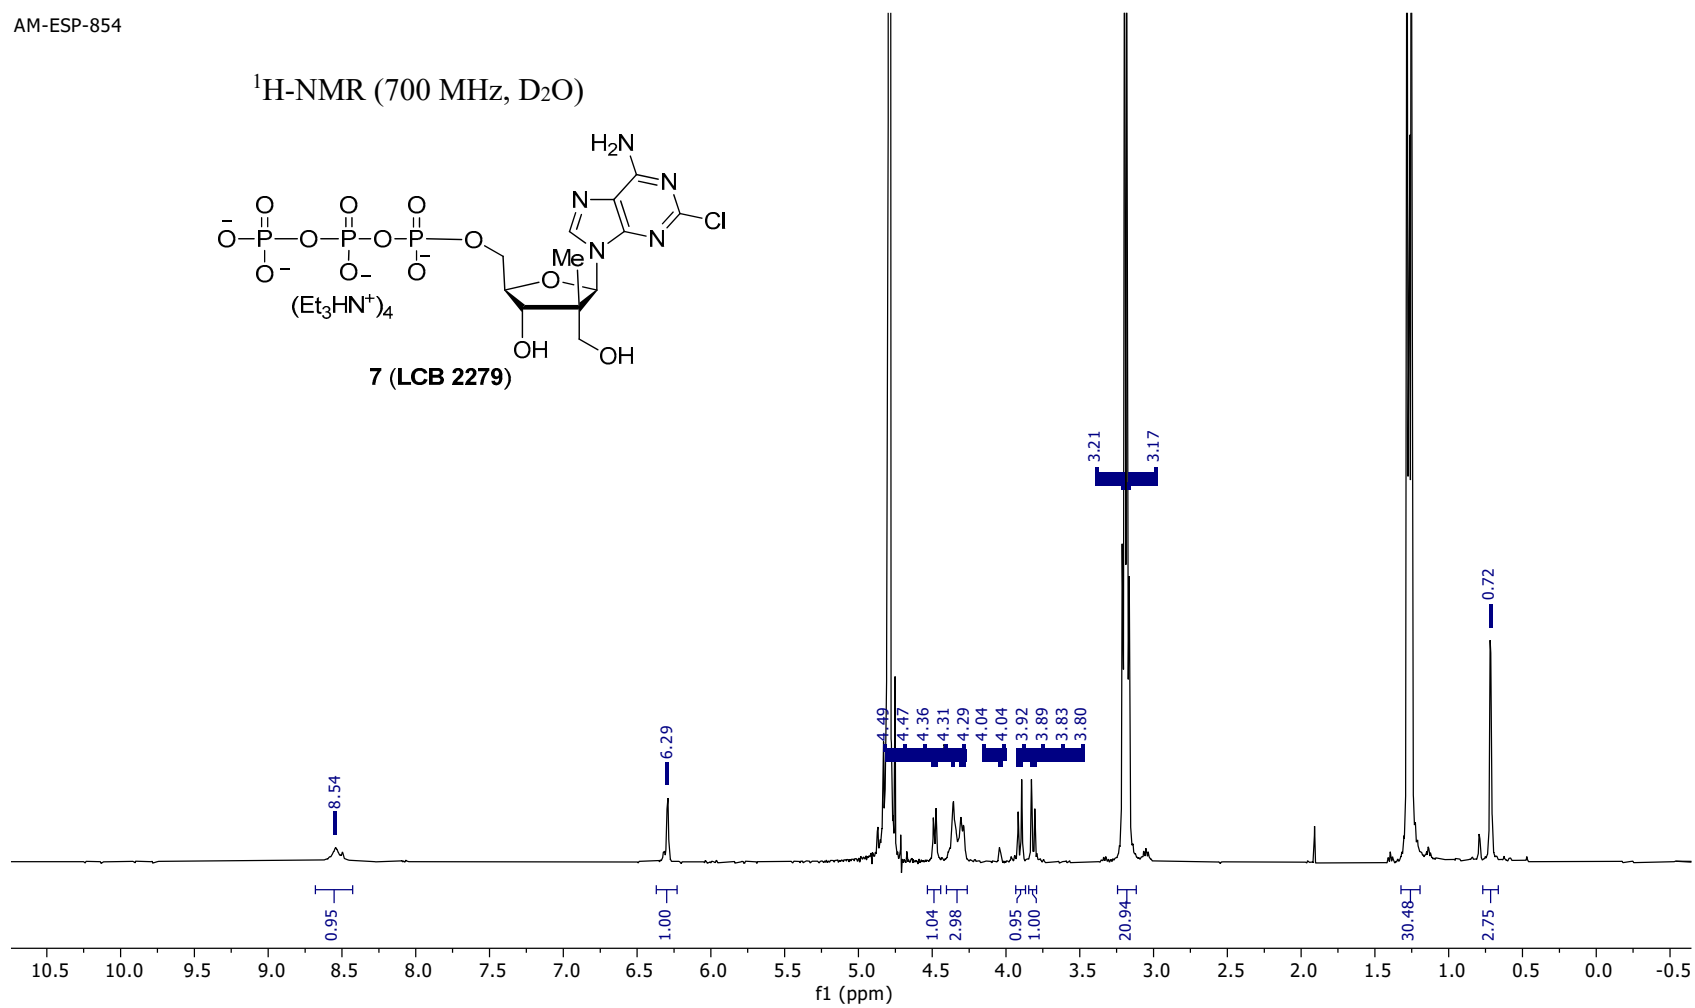

$^{13}\text{C}\{^1\text{H}\}$ -NMR (176 MHz,  $\text{D}_2\text{O}$ )

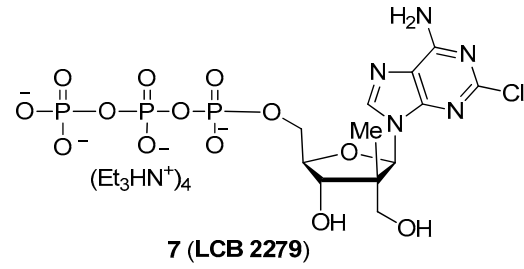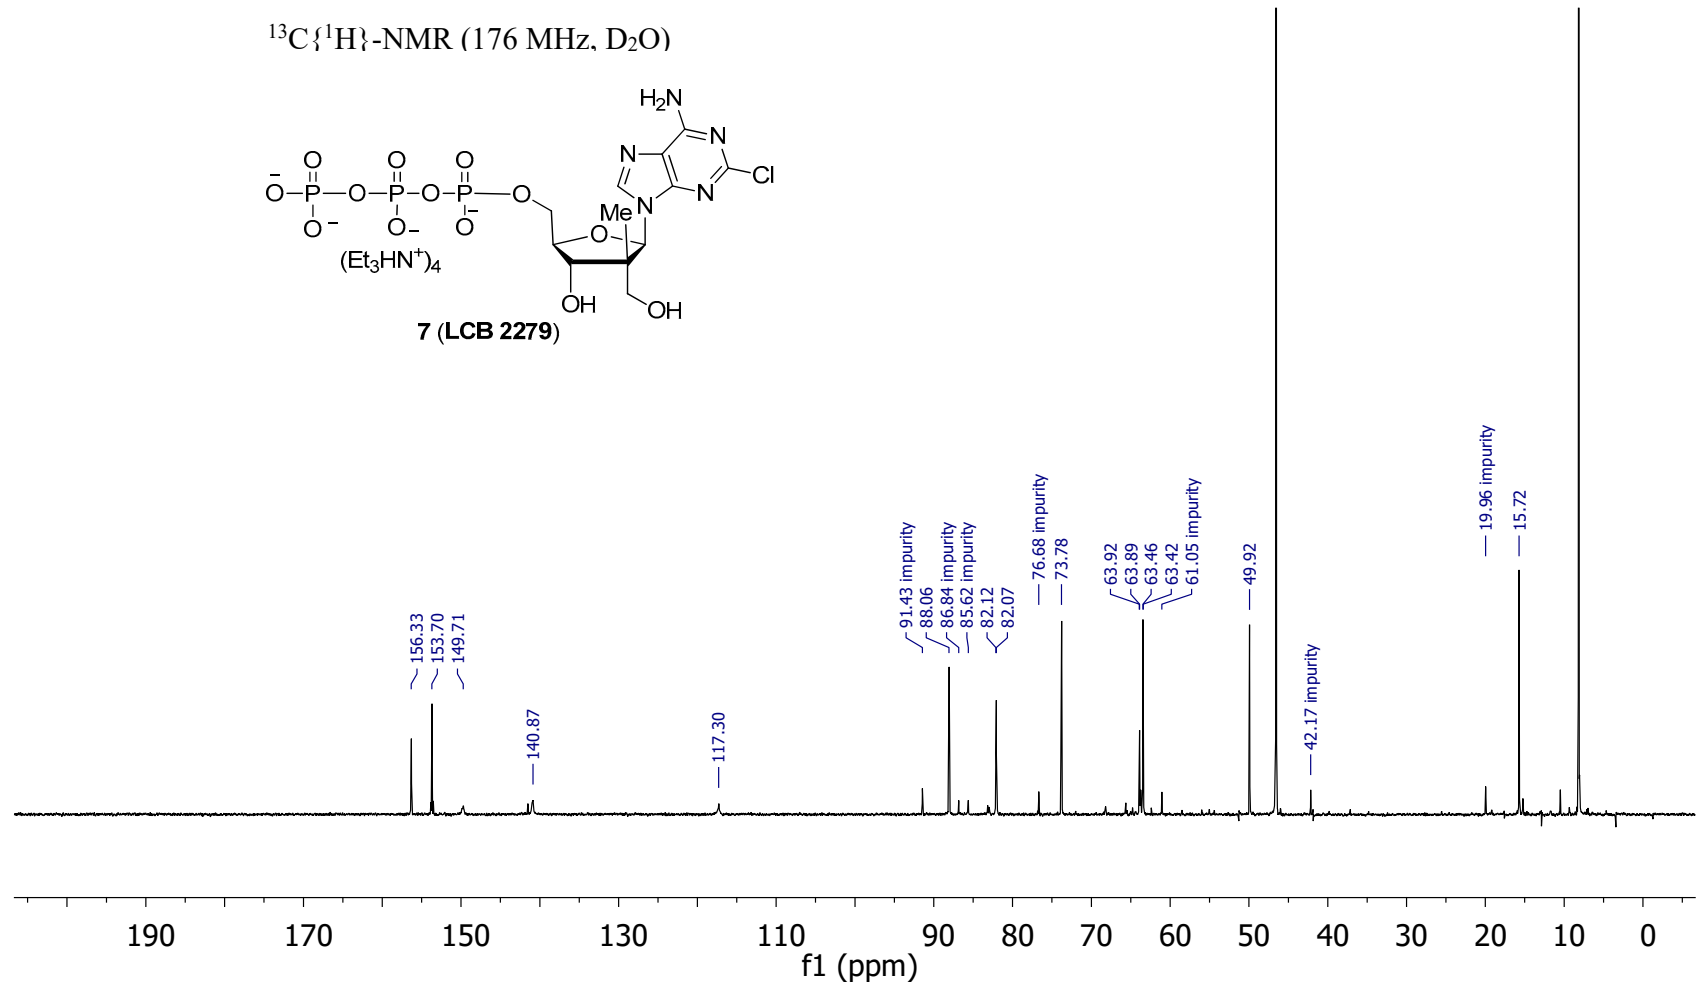

AM-ESP-854

 $^{31}\text{P}$ -NMR (162 MHz,  $\text{D}_2\text{O}$ )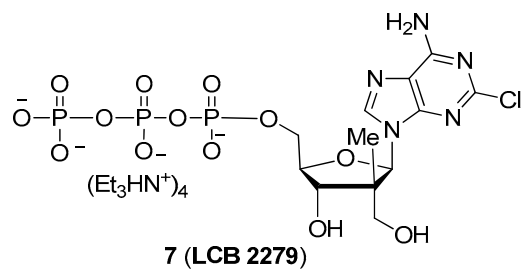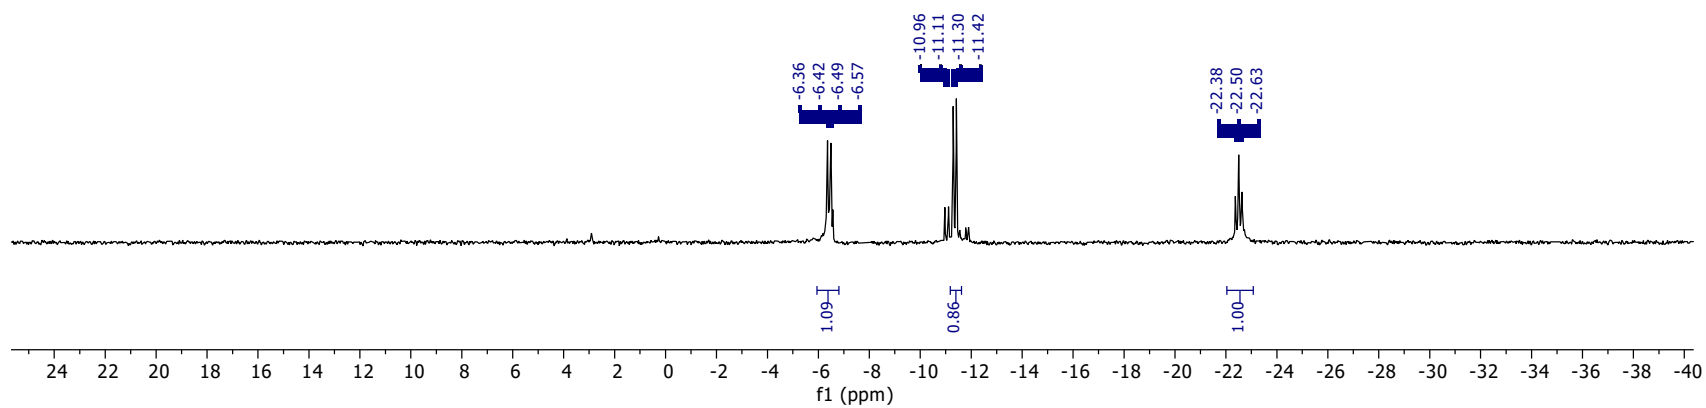

Supplement: s1 [file s1]
